1 **Gene-level alignment of single cell trajectories informs the progression of *in***  
2 ***vitro* T cell differentiation**

3  
4 **Authors:** Dinithi Sumanaweera<sup>1,†</sup>, Chenqu Suo<sup>1,2,†</sup>, Daniele Muraro<sup>1</sup>, Emma Dann<sup>1</sup>,  
5 Krzysztof Polanski<sup>1</sup>, Alexander S. Steemers<sup>1,3</sup>, Jong-Eun Park<sup>1,4</sup>, Bianca Dumitrascu<sup>5,6</sup>, Sarah  
6 A. Teichmann<sup>1,7\*</sup>

7  
8 **Affiliations:**

9 <sup>1</sup>Wellcome Sanger Institute; Wellcome Genome Campus, Hinxton, Cambridge, UK.

10 <sup>2</sup>Department of Paediatrics, Cambridge University Hospitals; Hills Road, Cambridge, UK.

11 <sup>3</sup>Princess Máxima Center for Pediatric Oncology; Utrecht, Netherlands

12 <sup>4</sup>Graduate School of Medical Science and Engineering, Korea Advanced Institute of Science  
13 and Technology (KAIST); Daejeon, Korea.

14 <sup>5</sup>Department of Statistics, Columbia University; New York, US

15 <sup>6</sup>Irving Institute for Cancer Dynamics, Columbia University; New York, US

16 <sup>7</sup>Theory of Condensed Matter, Cavendish Laboratory, Department of Physics, University of  
17 Cambridge; Cambridge, UK.

18 <sup>†</sup>These authors contributed equally to this work.

19 <sup>\*</sup>Corresponding authors. [st9@sanger.ac.uk](mailto:st9@sanger.ac.uk) (S.A.T.).

20 **Abstract:**

21 Single cell data analysis can infer dynamic changes in cell populations, for example across  
22 time, space or in response to perturbation. To compare these dynamics between two  
23 conditions, trajectory alignment via dynamic programming (DP) optimization is frequently  
24 used, but is limited by assumptions such as a definite existence of a match. Here we describe  
25 **Genes2Genes**, a Bayesian information-theoretic DP framework for aligning single-cell  
26 trajectories. **Genes2Genes** overcomes current limitations and is able to capture sequential  
27 matches and mismatches between a reference and a query at single gene resolution,  
28 highlighting distinct clusters of genes with varying patterns of gene expression dynamics.  
29 Across both real life and simulated datasets, **Genes2Genes** accurately captured different  
30 alignment patterns, and revealed that T cells differentiated *in vitro* matched to an immature *in*  
31 *vivo* state while lacking the final TNF $\alpha$  signaling. This use case demonstrates that precise  
32 trajectory alignment can pinpoint divergence from the *in vivo* system, thus providing an  
33 opportunity to optimize *in vitro* culture conditions.

## 34 Introduction

35 Recent advances in single-cell genomics, the mainstay of which is single-cell RNA  
36 sequencing (scRNA-seq), have revolutionized our understanding of biology and opened up  
37 new avenues of research<sup>1</sup>. With their single-cell resolution and ability to observe thousands of  
38 genes simultaneously, these new technologies enable the identification of transition cell states  
39 and the study of dynamic cellular processes (e.g. cell differentiation/development; cellular  
40 response to perturbations). The computational task of deriving a ‘timeline’ for each dynamic  
41 process (e.g. based on transcriptomic similarity) is referred to as ‘pseudotime trajectory  
42 inference’<sup>2</sup>. The next challenge is to then compare and align two (or more) trajectories, as  
43 when exploring similarities between *in vitro* cell differentiation and *in vivo* cell development,  
44 or the perturbation responses in control groups *versus* drug treatment groups (**Fig. 1a**). The  
45 benefit is obvious; for instance, identifying genes that differ between *in vitro* and *in vivo*  
46 systems can guide us to refine *in vitro* cell differentiation. Trajectory comparison poses a  
47 time series alignment problem which is dynamic programmable<sup>3</sup>. The goal is to find an  
48 optimal set of pairwise sequential correspondences between two trajectories.

49  
50 Currently, dynamic time warping (DTW) is often used to align two single-cell trajectories.  
51 Several notable attempts<sup>4-9</sup>, such as CellAlign<sup>5</sup>, employ DTW to identify correspondences  
52 between two different profiles, allowing the detection of timing differences in biologically  
53 similar processes<sup>10</sup>. Current practice is to interpolate the gene expression time series prior to  
54 DTW, and then minimize the Euclidean distance of expression vectors between the matched  
55 time points to find an optimal alignment. While DTW is a powerful approach with numerous  
56 uses, we are motivated to overcome its main limitations, i.e., (1) requiring every time point in  
57 each trajectory to match with at least one time point in the other (capturing time-warps only);  
58 (2) disregarding missing data or substantial differences between two series, occurring in the  
59 form of insertions or deletions (indels); and (3) using a distance metric which relies only on  
60 the difference of mean expression, without considering their distributions. We specifically  
61 address these by developing a new DP framework that formally handles matches and  
62 mismatches in a principled way. It overcomes the need to impose any ad hoc thresholds<sup>5</sup>  
63 and/or post hoc processing of a DTW output<sup>11</sup> to capture differential regions in gene  
64 expression.

65  
66 Warps and indels are fundamentally distinct (**Fig. 1b,c**). This is particularly highlighted in  
67 discussions about integrating DTW with the gap concept<sup>12,13</sup> (as in the area of biological  
68 sequence alignment<sup>14,15</sup>). Both matches and mismatches inform our understanding of  
69 temporal gene expression dynamics. A mismatch could either imply missing data or  
70 differential expression, which could be interesting to investigate further. For instance, a  
71 sudden rise or drop in expression of one system relative to the other might indicate that it is  
72 transitioning through a different cell state. A mismatch also occurs when a considerable  
73 fraction of cells in one system have a significantly different expression for some genes  
74 compared to that of the other, causing distributional differences. This is particularly clear  
75 when iPSC-derived organoid trajectories are compared to *in vivo* references, due to the  
76 upregulation of pluripotency markers in early stages of organoid development. On the other

77 hand, warps occur due to the differences in the relative speeds of cell maturation in diverse  
78 contexts. Matching and mismatching can also inform divergence and convergence patterns in  
79 expression (e.g. **Fig. 1d**), allowing their computational separation for further downstream  
80 analysis.

81  
82 Here we present Genes2Genes (G2G; **Fig. 2**), a novel framework for aligning single-cell  
83 transcriptomic trajectories of a reference and query system at single-gene resolution. G2G  
84 utilizes a DP alignment algorithm that accounts for matches, warps and indels by combining  
85 the classical Gotoh's biological sequence alignment algorithm<sup>15</sup> and DTW<sup>16</sup>. It is inspired by  
86 the concepts discussed in the related literature<sup>17-19</sup>, and employs a new Bayesian information-  
87 theoretic measure based on minimum message length inference<sup>20-22</sup> to quantify the distance  
88 between two gene expression distributions assumed to be Gaussian. G2G facilitates: (1)  
89 generating descriptive pairwise alignments at gene-level, (2) identifying gene clusters of  
90 similar alignment patterns, (3) identifying genes with differential dynamic expression  
91 profiles, (4) exploring associated biological pathways, and (5) deriving an aggregate  
92 alignment across all or a subset of genes.

93  
94 We first validate G2G's ability to accurately align and capture different patterns using  
95 simulated datasets. We further demonstrate how G2G captures mismatches and offers gene-  
96 level alignment, through benchmarking against related methods on a published real dataset<sup>23</sup>  
97 and a simulated negative control<sup>11</sup>. We next show how G2G quantitatively assesses the  
98 progression of *in vitro* human T-cell differentiation in an in house cultured artificial thymic  
99 organoid (ATO) compared to an *in vivo* reference of human T cell development. We find that  
100 the TNF $\alpha$  signaling pathway in the final stage of *in vivo* T cell maturation is not recapitulated  
101 *in vitro*, and identify potential transcription factors for optimizing *in vitro* cell engineering.

102

## 103 **Results**

### 104 **Genes2Genes (G2G) aligns single-cell trajectories with dynamic** 105 **programming, employing a Bayesian information-theoretic measure**

106 Dynamic programming (DP) remains central to many sequence alignment algorithms. G2G is  
107 a new DP framework to infer and analyze gene trajectory alignments between a single-cell  
108 reference and query. Given a reference sequence  $R$  (a time series with time points:  
109  $R_1, R_2, \dots R_j, \dots R_{|R|}$ ) and query sequence  $Q$  (a time series with time points:  
110  $Q_1, Q_2, \dots Q_j, \dots Q_{|Q|}$ ), a computational alignment between them can inform us of the one-to-  
111 one correspondences (matches), one-to-many/many-to-one correspondences  
112 (expansion/compression warps) and mismatches (insertions and deletions) between their time  
113 points in linear order (**Fig. 1b**). A general DP algorithm finds their optimal alignment by  
114 constructing a pairwise alignment cost matrix and generating the optimal path with the  
115 minimum cost (**Fig. 1c**). This relies on a scoring scheme to quantify correspondences  
116 between every pair of  $R$  and  $Q$  time points.

117

118 Unlike the current DP alignment approaches (i.e. DTW and DNA/protein alignment), G2G  
119 implements a DP algorithm that handles both matches (including warps) and mismatches  
120 jointly, and runs it between the reference and query for each gene. This algorithm extends  
121 Gotoh's three-state sequence alignment algorithm<sup>15</sup> to five-states (**Fig. 1b**) for  
122 accommodating warps. Our DP scoring scheme incorporates a Bayesian information-  
123 theoretic cost function based on the minimum message length (MML) inference<sup>20-22</sup> (top left  
124 of **Fig. 2, Supplementary Fig. 1**), and the state transition probabilities from a five-state  
125 probabilistic finite state machine (**Extended Data Fig. 1**). The MML criterion allows us to  
126 compute a cost for matching any reference time point  $R_j$  and query time point  $Q_i$  based on  
127 their corresponding gene expression distributions. It evaluates their distributional differences  
128 in terms of both mean and variance, acknowledging that one trajectory may be noisier than  
129 the other. The five-state machine allows us to compute a cost of assigning an alignment state  
130 for  $R_j$  and  $Q_i$  out of the five possible states of alignment.

131

## 132 **Overview of the G2G framework**

133 The G2G framework is composed of several components to support single-cell trajectory  
134 comparison, which include input preprocessing, DP alignment algorithm, alignment  
135 clustering and downstream analysis (**Fig. 2**). It takes the input as log1p normalized single-cell  
136 gene expression matrices of a reference system and a query system, and their pseudotime  
137 estimates. G2G then performs interpolation to smoothen each gene expression trajectory.  
138 This first min-max normalizes the pseudotime axis over which we take a predefined number  
139 of equispaced interpolation points, similar to CellAlign<sup>5</sup>. For each interpolation time point,  
140 we estimate a Gaussian distribution of gene expression, taking into account all cells, kernel-  
141 weighted<sup>5</sup> by their pseudotime distance to this interpolation time point. Compared to the  
142 existing methods, our approach fits the entire distribution instead of only estimating the mean  
143 expression level at each interpolation point. The interpolated gene trajectories of the  
144 reference and query are then aligned using our DP algorithm. This generates optimal  
145 trajectory alignments for all input genes, described by five-state alignment strings (**Fig. 1d**  
146 and top right matrix of **Fig. 2**). These strings are then binary encoded to compute their  
147 pairwise Hamming distances, and genes displaying similar alignment patterns are clustered  
148 together using agglomerative hierarchical clustering. Alignments and their cluster  
149 memberships together allow us to proceed with further downstream analysis such as gene set  
150 overrepresentation analysis. (See Methods for details). The algorithmic novelties, definitions  
151 and descriptive level of the generated alignments altogether fundamentally distinguishes G2G  
152 from the current alignment approaches.

153

## 154 **G2G accurately identifies different patterns of alignment with simulated 155 data experiments**

156 To benchmark how well G2G captures different alignment patterns, we performed two  
157 simulated data experiments on: (1) an artificial dataset (**Fig. 3a,e, Extended Data Fig. 2, and  
158 Supplementary Table 2-3**), and (2) a real biological dataset with artificial perturbations  
159 (**Fig. 3f,g, Extended Data Fig. 3, and Supplementary Table 4-17**). See Methods for details.

160

## 161 **Experiment 1**

162 We simulated 3500 trajectory pairs under three main classes of pattern: (1) *Matching* (500  
163 genes), (2) *Divergence* (1500 genes), and (3) *Convergence* (1500 genes), using Gaussian  
164 Processes and suitable kernels<sup>24,25</sup>, to test how well G2G aligns and captures them. Each  
165 trajectory consists of 300 data points spread across the pseudotime range [0,1]. In the  
166 *Divergence* and *Convergence* group, we have an equal number of pairs bifurcating at three  
167 time points (approximately at bifurcation time point  $t_b \in [0.25, 0.5, 0.75]$ , indicating early,  
168 mid, and late bifurcation, respectively). We first examined G2G performance on each of the  
169 seven classes of pattern, in identifying matched and mismatched regions accurately (with 50  
170 interpolated time points – shortest possible alignment length  $L_{min} = 50$  and longest possible  
171 alignment length  $L_{max} = 100$ ), followed by clustering of all alignments.

172  
173 **Statistics for expected match and mismatch regions:** For *Matching* pairs (**Fig. 3b**), 86.4%  
174 alignments give 100% alignment, while the rest show at least one false mismatch with an  
175 average length of 4.74 ( $\sim 9.4\% L_{min}$ ). The mean matching percentage (the percentage of total  
176 matching, including one-to-one matches and warps, in the alignment string output, which we  
177 term ‘alignment similarity’) is 98.8%. For *Divergence* (**Fig. 3c**), we expect to see a full match  
178 at the beginning (start-match) followed by a full mismatch at the end (end-mismatch), where  
179 the match/mismatch length depends on the approximate location of bifurcation. Thus we  
180 report the distributions of start-match lengths (that follows a false mismatch if there is any),  
181 end-mismatch lengths, and start-mismatch lengths (detecting false mismatches) in all  
182 alignments across the three bifurcating locations. We observed no end matches,  
183 demonstrating that G2G accurately mismatches the differentially expressed region. However,  
184 33.13% of the divergent alignments give at least one false start-mismatch (30.4% for  $t_b =$   
185 0.25, 33.2% for  $t_b = 0.5$ , and 35.8% for  $t_b = 0.75$ ). However, their median mismatch  
186 length is 1 (with mean 2.29 =  $\sim 4.6\% L_{min}$ ). All distributions fall within their expected ranges  
187 of length with a few outliers. As the bifurcation point moves towards the maximum  
188 pseudotime, the number of matches increases while the number of mismatches decreases as  
189 expected. In contrast, *Convergence* alignments (**Fig. 3d**) (where we expect start regions to  
190 fully mismatch while end regions fully match) show only a 3.5% of all convergent  
191 alignments with false end-mismatches (2.8% for  $t_b = 0.25$ , 5.3% for  $t_b = 0.5$ , and 2.4% for  
192  $t_b = 0.75$ ). Their median mismatch length is 4 (with mean 11.84 =  $\sim 23.7\% L_{min}$ , mainly  
193 due to just 4 outliers with complete mismatching alignments arising from  $t_b=0.75$  case).  
194 Again, the distributions of end-match lengths and start-mismatch lengths across all subgroups  
195 fall within the expected ranges. We also see no false start matches. Only one 0.5  
196 *Convergence* alignment (0.06%) showed a single mismatch within an expected match region.  
197 In conclusion, for *Matching*, *Convergence* and *Divergence* patterns, G2G is able to generate  
198 correct alignments with relatively high accuracy.

199  
200 **Clustering alignments:** **Fig. 3e** shows the pairwise alignment distance matrix, which  
201 demonstrates a clear separation of the seven pattern classes. Hierarchical agglomerative  
202 clustering of the alignments at 0.2 distance threshold results in 11 clusters, capturing all the  
203 distinct patterns with only 0.34% mis-clustering rate. 21 alignments of early *Divergence* and

204 late *Convergence* appear in 4 pure subclusters due to warps, confirming G2G’s ability to  
205 distinguish between usual and outlying patterns. (Further results in **Extended Data Fig. 4**).

206

207 Overall, G2G has a good detection accuracy of the expected matches and mismatches across  
208 all the seven classes of trajectory alignment patterns we evaluated. Clustering results of their  
209 five-state alignment strings also confirm the utility of such descriptive outputs.

210

## 211 ***Experiment 2***

212 To test the ability to detect matching patterns in real scRNA-seq data, we used a scRNA-seq  
213 dataset of E15.5 murine pancreatic development<sup>26</sup> and considered gene expression profiles of  
214 769 genes varying in expression during beta-cell differentiation. We randomly split cells into  
215 query and reference, and simulated the presence of a mismatch in the form of a deleted  
216 portion (perturbation scenario 1) or changed portion (perturbation scenario 2) of increasing  
217 size (pseudotime was equally divided into 50 bins with an increasing number of bins being  
218 perturbed) at the beginning of the trajectory (**Fig. 3f**). We then performed alignments with  
219 G2G (under 50 interpolation time points) and calculated the percentage of match calling, i.e.,  
220 alignment similarity (**Fig. 3g**). We found that on average, G2G recovered the matching region  
221 accurately across genes, with 91% mean alignment similarity when no perturbation was  
222 introduced, and 86% mean alignment similarity for mismatches smaller than 20% of  
223 pseudotime bins (10/50 bins) across the two different perturbation scenarios. For perturbation  
224 scenario 1, the alignment similarity decreases with increasing deletion sizes as expected  
225 across smaller perturbation sizes. However, the detected mismatch length is shorter than  
226 expected for deletions larger than 20%. This is due to the relative non-varying gene  
227 expression trends between pseudotime bin 10 to 20 (**Extended Data Fig. 3a**) and hence it  
228 causes warps instead of mismatches. For perturbation scenario 2, the alignment similarity has  
229 an expected maximum and minimum. For example, if the perturbation size = 5 in the query,  
230 the minimum mismatch segment to expect is: “I I I I I”, whereas the maximum mismatch  
231 segment to expect is: “I I I I I D D D D D” (illustrated in **Extended Data Fig. 3b**). Accordingly,  
232 the observed trend generally follows the expected trends, falling within the expected ranges  
233 for larger perturbations sizes.

234

235 In general, we observe that the alignment accuracy drops when the underlying assumption of  
236 a smooth trajectory breaks, and/or when there are significant inconsistencies in the cell  
237 densities across the trajectories. As apparent from this experiment, we also note that it is  
238 extremely challenging to simulate perturbations using real life datasets for trajectory  
239 benchmarking, as they may introduce warps instead of expected mismatches as shown in  
240 perturbation scenario 1. Consequently, it is difficult to guarantee a specific linear ordering of  
241 matches and mismatches. Overall, the results support that G2G has a good accuracy rate of  
242 match and mismatch detection.

243

## 244 **G2G captures mismatches and offers gene-level resolution alignment**

245 To benchmark our method against the widely-known DTW-based method, CellAlign<sup>5</sup>, we  
246 performed G2G alignment on the same dataset<sup>23</sup> used by CellAlign (**Fig. 4a**), which includes

247 time-course data of murine bone marrow-derived dendritic cells stimulated with PAM3CSK  
248 (PAM) or lipopolysaccharide (LPS) to simulate responses to different pathogenic  
249 components. The main difference between CellAlign and G2G is that, CellAlign only  
250 considers matches and warps through DTW, while G2G’s algorithm unifies matches and  
251 mismatches through a single DP algorithm by imposing the notion of gaps on top of DTW via  
252 a probabilistic framework and Gotoh’s algorithm<sup>15</sup>. Further conceptual differences between  
253 G2G and CellAlign are summarized in **Supplementary Table 1**. Of note, G2G outputs both  
254 individual gene-level alignments and an aggregate (average) alignment path over all gene-  
255 level alignments, unlike CellAlign which outputs only a single, high-dimensional alignment  
256 across all genes. This is particularly useful when there is heterogeneity in alignment patterns  
257 among different genes.

258  
259 G2G’s ability to capture mismatches is revealed in aligning genes from the “core antiviral  
260 module” of the PAM/LPS dataset (**Supplementary Table 18-22**). CellAlign demonstrated a  
261 ‘lag’ in expression in PAM stimulation compared to LPS<sup>5</sup>. This is also captured by the G2G  
262 aggregate alignment whereby later PAM pseudotime points were mapped to earlier LPS  
263 pseudotime points (**Fig. 4b**). In addition, G2G identified mismatches in the early and late  
264 pseudotime points.

265  
266 In the early pseudotime points, the gene expression was consistently low in the PAM  
267 condition, whereas some of the cells stimulated by LPS were already showing elevated  
268 expression at early time points (**Fig. 4c**). These have also been noticed in the original paper  
269 and were described as “precocious expressers”<sup>23</sup>. The mismatch in the late pseudotime points  
270 of LPS stimulation was caused by the peaked expression, while the expression of the PAM-  
271 stimulated cells was still on the rise and had not reached a peak yet (**Fig. 4c**).

272  
273 In the case of aligning genes from the “peaked inflammatory module” (**Supplementary**  
274 **Table 23-30**), **Fig. 4d** shows the main average path of alignment generated by G2G. In  
275 addition, genes were clustered based on their alignment patterns (method illustrated in **Fig. 2**;  
276 results in **Extended Data Fig. 5-6**), and the aggregate alignment path for each cluster was  
277 different from the main average path (**Fig. 4d**). Representative genes from different clusters  
278 are shown in **Fig. 4e**. Although they all had matches for some pseudotime points, there are  
279 subtle differences in the length and position of the time points that are matched.

280  
281 In addition, genes can be examined via the similarity between their expression profiles along  
282 the query and reference pseudotime trajectories. This can be computed through their  
283 percentage of alignment similarity. We identified genes with low alignment similarity and  
284 high log fold change between query and reference data, such as *CCRL2* and *C5ARI*. *CCRL2*  
285 expression started at a much higher level and peaked early in the LPS condition, whereas  
286 following PAM stimulation it grew as a slow incline. This stark difference suggests that  
287 *CCRL2* is a more LPS-specific response gene, consistent with previous reports in murine  
288 dendritic cells, macrophages, glial cells, astrocytes and microglia stimulated with LPS<sup>27,28</sup>.  
289 On the other hand, these data suggest that *C5ARI* is a PAM-specific response gene. In the  
290 case of the *TNF* gene, although the differential expression log fold change is almost



291 negligible, the low alignment similarity revealed different expression dynamics. This  
292 difference would not be picked up by differential gene expression, hence highlighting the  
293 importance of such an alignment. For the genes that have high alignment similarity such as  
294 *CD44*, the log fold change should be small due to consistent matching across the pseudotime.  
295

296 The above results showcase the benefit of G2G alignments over DTW alignments, i.e., to  
297 capture mismatched regions in gene expression trajectories. While the DP matrix of DTW  
298 may reflect the time points of relative differences and similarities in gene expression between  
299 two trajectories, we need extra effort subjected to thresholding to perform local DTW  
300 alignment and extract mismatches. TrAGEDy<sup>11</sup>, the most recent extension on CellAlign<sup>5,11</sup>,  
301 performs such ad hoc processing of DTW outputs (See feature comparison in  
302 **Supplementary Table 1**). We next compared G2G with CellAlign and TrAGEDy on a  
303 simulated dataset containing two trajectories with no shared process<sup>11</sup>(referred to as a  
304 negative control dataset). G2G successfully quantifies that they are very dissimilar, with a  
305 low average of 34.5% alignment similarity across all the genes (**Supplementary Fig. 2a**,  
306 **Supplementary Table 52**). G2G also generates an aggregate alignment solely with insertions  
307 and deletions, which agrees with the expectation (**Supplementary Fig. 2b**). CellAlign is  
308 unable to produce a meaningful output for this dataset due to its DTW assumption of no  
309 mismatch. The alignment from TrAGEDy includes segments of one-to-one matches. This  
310 could be caused by the assumption of a definite match in between, in TrAGEDy post hoc  
311 thresholding. It is further validated by testing on three simulated genes with completely  
312 mismatched trajectories (**Supplementary Fig. 2c**). While TrAGEDy falsely generates  
313 matched subregions, G2G gives accurate outputs of 100% mismatch.  
314

315 Overall, the above results over a real biological dataset and a negative control validate that  
316 G2G can accurately detect mismatches.  
317

### 318 ***In vivo, in vitro* human T cell development comparison using G2G reveals** 319 **differences in TNF $\alpha$ signaling**

320 We next applied G2G to compare *in vitro* and *in vivo* human T cell development. Thymus is  
321 the key site for T cell development in humans, where lymphoid progenitors differentiate  
322 through stages of double negative (DN) and double positive (DP) T cells to acquire T cell  
323 receptor (TCR) (illustrated in **Fig. 5a**). If the TCR recognizes self antigen presented on MHC  
324 via the process of positive selection, the developing T cells further differentiate through  
325 abT(entry) cells and finally mature into single positive (SP) T cells. There are different  
326 subsets of SP T cells, including CD4<sup>+</sup>T, CD8<sup>+</sup>T and regulatory T (Treg) cells, as well as the  
327 newly recognized unconventional type 1 and type 3 innate T cells and CD8AA<sup>29,30</sup>. To  
328 investigate human T cell development in a model system, we differentiated induced  
329 pluripotent stem cells (iPSCs) into mature T cells using the artificial thymic organoid (ATO)  
330 system<sup>31</sup>. We previously harvested differentiated cells from week 3, 5, and 7 and reported  
331 that the mature T cells in ATO were most similar to the *in vivo* type 1 innate T cells. To  
332 explore this further, we performed scRNA-seq analysis of differentiated cells harvested at  
333 regular intervals throughout the differentiation, i.e., including the early time points as well

334 (Fig. 5b). Cell types were annotated (low-level annotation in Fig. 5c with more refined  
335 annotation in Extended Data Fig. 7a) using a combination of the logistic regression based  
336 predictions with CellTypist<sup>32</sup> (Extended Data Fig. 7b) and marker gene analysis (Extended  
337 Data Fig. 8). The ATO system captures the differentiation from stem cells, through  
338 mesodermal progenitors, endothelium, to haematopoietic lineage, and then further down to T  
339 cell lineage (Fig. 5b).

340

341 We then combined the *in vitro* ATO data with the relevant *in vivo* cell types from our  
342 developing human immune atlas<sup>30</sup> (hereafter referred to as the pan fetal reference) and  
343 integrated using scVI<sup>33</sup> onto a common latent embedding (Fig. 5d,e). For ATO data, the  
344 pseudotime was estimated using a Gaussian Process Latent Variable Model (GPLVM)<sup>34</sup> with  
345 sampling times as priors (Fig. 5f). GPLVM has previously been successfully applied in  
346 single-cell trajectory inference to incorporate useful priors<sup>35–39</sup>. The pan fetal reference cells'  
347 pseudotime was computed similarly by estimating their time priors from the nearby ATO  
348 cells (see Methods).

349

350 Alignment between *in vitro* ATO data and *in vivo* pan fetal reference was performed with  
351 G2G (under 15 equispaced time points in [0,1] pseudotime range) using all transcription  
352 factor (TF) genes<sup>40</sup> (Supplementary Table 31), as many TFs function as 'master regulators'  
353 of cell states and have been used to induce cell differentiation. The aggregate alignment result  
354 for all TFs showed a mismatch at the beginning and a mismatch at the end (Fig. 6a). We  
355 explored this further by performing gene set overrepresentation among the most mismatched  
356 genes (alignment similarity < 40%, Fig. 6b, Supplementary Table 32), and found that  
357 pluripotency and TNF $\alpha$  signaling pathways were the two most significant gene sets. Many of  
358 the genes in the pluripotency signaling pathway, such as the well-known pluripotent genes  
359 *POU5F1*, *NANOG* and *SOX2*<sup>41</sup>, were expressed at the beginning of ATO development but  
360 missing from the reference (Fig. 6c). This is expected given that the *in vitro* differentiation  
361 started from iPSCs, whereas the earliest cells from the *in vivo* reference were haematopoietic  
362 stem cells (HSCs). On the other hand, *HHEX*, which is known to be expressed in HSC<sup>42,43</sup>  
363 and early DN T cells<sup>44</sup> demonstrates another pattern: matching between *in vivo* and *in vitro*  
364 HSC and DN T cells as expected although the maximum *HHEX* expression in *in vitro* cells  
365 was lower than that of *in vivo* cells (Fig. 6c).

366

367 With regard to the TNF $\alpha$  signaling via NF $\kappa$ B pathway, many of the genes such as *FOSB*,  
368 *JUNB* and *NR4A2* show an increasing trend at the last stage of *in vivo* T cell development,  
369 and this increase is missing in the *in vitro* T cells (Fig. 6d). TNF $\alpha$  activation of NF $\kappa$ B  
370 pathway has been implicated in the final functional maturation of murine T cells within the  
371 thymus<sup>45,46</sup> and indicates that, while the ATO system captures the single positive T cell  
372 development through positive selection, other *in vivo* signaling necessary for maturation,  
373 such as TNF $\alpha$  pathway, might be missing. By systematically comparing the *in vivo* data to *in*  
374 *vitro* data with G2G, it gives us potential targets for further *in vitro* optimization. There are  
375 exceptions to this overall pattern, such as *KLF2*, whose expression is higher in *in vitro* T cells  
376 than that in *in vivo* (Fig. 6d). This might be the result of each gene being regulated by more  
377 than one signaling pathway. We remark that although it is possible to recover the difference

378 between TNF $\alpha$  signaling by doing direct differential gene expression between cell subsets,  
379 e.g., end products of ATO vs *in vivo* T cells, a key advantage of using the trajectory  
380 alignment is that we could pinpoint where along the differentiation did the mismatch occur.  
381 This would in turn inform us when to introduce the TNF $\alpha$  in *in vitro* optimization.  
382

383 Using G2G, genes are also clustered based on their alignment patterns (**Extended Data Fig.**  
384 **9, Supplementary Table 31,33-45**). Cluster 4 captures the pluripotent genes, and the  
385 majority show a complete mismatch alignment pattern. Cluster 10 genes are enriched in the  
386 Hippo signaling pathway, and many of its genes show insertions at the beginning of the  
387 pseudotime. Hippo signaling has been implicated in stem cell biology and pluripotency  
388 regulation<sup>47</sup>, and the observed mismatch might again be explained by the stem cell stage  
389 present in the organoid but absent from the *in vivo* reference. Interestingly, cluster 0 genes  
390 show mismatches in the middle time points. This might represent a missing cell state, e.g.,  
391 *BATF2* is expressed sparsely in endothelial cells which are present in the *in vitro* but not in  
392 the *in vivo* system (**Extended Data Fig. 10**).

393  
394 We further repeated the analysis restricting to T cell lineages, i.e., DN T cells onwards  
395 (**Extended Data Fig. 11a-d, Supplementary Table 46-47**). TNF $\alpha$  signaling via NF $\kappa$ B  
396 pathway remains the most significantly enriched gene set among the mismatched genes.  
397

398 The above alignments were performed using *in vivo* type 1 innate T cells and the relevant  
399 precursors, as we previously found that the *in vitro* mature T cells were most similar to the *in*  
400 *in vivo* type 1 innate T cells<sup>30</sup>. However, *in vitro* cell differentiation to conventional CD8+T  
401 cells might also provide promising routes for cell therapies. We therefore performed another  
402 G2G alignment using *in vivo* conventional CD8+T cells and the relevant T lineage precursors  
403 (DN T cells onwards), with the results shown in **Extended Data Fig. 11e-h** (and  
404 **Supplementary Table 48-49**). The most significantly enriched gene set among the  
405 mismatched genes is also TNF $\alpha$  signaling pathway. To further explore the differences in the  
406 two alignment results, we focused on genes that showed the most dissimilar alignment results  
407 (genes that had alignment similarity differences  $> 0.5$  or  $< -0.5$ ) (**Fig. 6e**). Three of the genes,  
408 *SOX4*, *FOXP1* and *ARID5B* had large log<sub>2</sub> fold change differences (absolute log<sub>2</sub> fold change  
409  $> 1$ ) between type 1 innate T cells and CD8+T cells. For these three genes, the expression  
410 dynamics of *in vitro* T cell development are more similar to those of *in vivo* type 1 innate T  
411 cells, whereas *in vivo* CD8+T cells had higher *SOX4*, *FOXP1* and lower *ARID5B* expression  
412 in the last stages of development (**Fig. 6e**). While the role of *SOX4* in CD8+T cell  
413 development is unclear, *FOXP1* has been shown to maintain a quiescent profile in naive  
414 CD8+T cells<sup>48,49</sup>, and our results are in keeping with a more activated profile in type 1 innate  
415 T cells. *ARID5B* has been reported to regulate metabolic programming and promote IFN $\gamma$   
416 production in NK cells<sup>50</sup>. The higher expression in type 1 innate T cells might explain some  
417 of their NK-like features<sup>29,30</sup>. On the other hand, for *BHLHE40*, which is downstream of  
418 TNF $\alpha$  signaling and other pro-inflammatory cytokines<sup>51</sup>, its expression dynamic in *in vitro* T  
419 cell development is more similar to that in CD8+T cells, while the *in vivo* type 1 innate T  
420 cells have increased expression at the end.  
421

422 Overall, G2G alignment between *in vivo* and *in vitro* human T cell development revealed  
423 potential targets for further optimization of *in vitro* T cell differentiation (illustrated in **Fig.**  
424 **6f**).

425

## 426 **Discussion**

427 Genes2Genes offers a structured alignment framework to compare single-cell pseudotime  
428 trajectories at single-gene resolution. We validated G2G's accuracy in identifying  
429 mismatches and different alignment patterns through extensive simulation studies. We have  
430 also benchmarked against current state-of-art methods in trajectory alignment using a real-life  
431 dataset and a simulated negative control dataset from the literature. In addition, we  
432 demonstrated G2G's potential in identifying genes and pathways that can guide the  
433 refinement of T cell differentiation in an organoid protocol.

434

435 Given cell-by-gene matrices of reference and query systems along with their corresponding  
436 pseudotime estimates, G2G generates a five-state alignment string for each gene of interest  
437 by running a DP algorithm that handles both matches and mismatches. The gene sets to  
438 compare can be all expressed genes against each other, or restricted to gene sets of interest  
439 such as e.g. TFs, regulons, highly variable genes or genes associated with certain  
440 biological/signaling pathways of interest. Compared to existing alignment approaches, G2G  
441 outputs more descriptive and direct results highlighting both matched (including warps) and  
442 mismatched regions of a gene over time. G2G provides a powerful addition to the current  
443 repertoire of comparative analysis toolboxes for any pseudotime alignment task, e.g., *in*  
444 *vivo/in vitro*, treatment/control, cross-species etc.

445

446 An important feature of G2G are the gene-specific alignments. Most existing methodologies  
447 produce a single alignment for all genes by computing high-dimensional Euclidean distances  
448 over their mean gene expression vectors. Such metrics suffer from 'the curse of  
449 dimensionality' by losing accuracy as the number of genes increases<sup>52</sup>. Importantly, in many  
450 contexts, an overall alignment across all genes masks gene heterogeneity along trajectories in  
451 the reference and query systems. Alpert et al (2018)<sup>5</sup> discuss choosing the right alignment  
452 resolution, recommending alignment of the largest gene set that shows significant differential  
453 expression (DE genes) over time. This is to remove stably expressed genes which may add  
454 noise and skew the alignment results. Our method goes further and fully resolves all gene  
455 groups with distinct matching and mismatching patterns at different stages along trajectories  
456 (**Fig. 4d, Extended Data Fig. 4-6**).

457

458 The gene-specific alignment of G2G also allows users to cluster genes based on their  
459 matching patterns to form groups with broadly similar alignments. We show that pathway  
460 overrepresentation analysis on each gene cluster can reveal specific biological signaling  
461 pathways that are driving the differences in pseudotime trajectories at different stages. These  
462 pathways and gene sets can be a starting point for protocol intervention strategies in the case  
463 of *in vivo/in vitro* alignments, and for mechanistic molecular interpretation of differences  
464 between trajectories in other cases.

465

466 The reliability of a trajectory alignment depends on how trustworthy the given pseudotime  
467 estimates are<sup>2</sup>. Different pseudotime estimates can produce different alignment distributions.  
468 While our initial G2G framework provides proof-of-concept by demonstrating the power of  
469 gene-level DP alignment to discover differential genes along pseudotime trajectories, future  
470 work is needed to develop suitable methods to calibrate its input (i.e. pseudotime estimates  
471 and interpolation), and better parameter optimization strategies to ensure more reliable  
472 alignment distributions. For instance, an adaptive window size for the Gaussian kernel-based  
473 interpolation may optimize the method's sensitivity to the variance of expression in the  
474 nearby cells. Furthermore, the current G2G version can only compare two linear trajectories  
475 without considering branching processes. We are aware of other efforts in aligning branched  
476 processes with DTW based tree alignment<sup>8</sup>. The output from such alignments, i.e., identified  
477 pairs of correspondences, could be further inputted into G2G for a comprehensive pairwise  
478 lineage alignment to capture mismatches.

479

480 In summary, G2G provides a formal trajectory alignment for single-cell transcriptomic data  
481 and is able to capture matches and mismatches at single-gene level. It enables a deeper  
482 understanding of the diversity of gene-level trajectory alignments across single-cell datasets.  
483 The G2G package is easy-to-use and freely available online at  
484 <https://github.com/Teichlab/Genes2Genes> with a tutorial. We have demonstrated that  
485 regenerative medicine can specifically benefit from such trajectory comparisons by extracting  
486 cues to guide refinement of *in vitro* cell engineering to recapitulate *in vivo* development. We  
487 envision that the software will be useful to the community for exploring other biological  
488 scenarios such as cell activation/stimulation responses in control and disease, generating new  
489 insights to advance our understanding of cell development and function in health and disease.



512 their pseudotime ( $x$ -axis) for the gene *SERTAD2* in the PAM/LPS dataset from Shalek et al  
513 (2014)<sup>23</sup>. The bold lines represent mean expression trends, while the faded data points are 50  
514 random samples from the estimated expression distribution at each time point. The black  
515 dashed lines visualize matches and warps between time points. The boxed alignment string  
516 describes matches and mismatches for the gene (stars represent time points, and ^ represent a  
517 repeated time point from the left due to a warp).

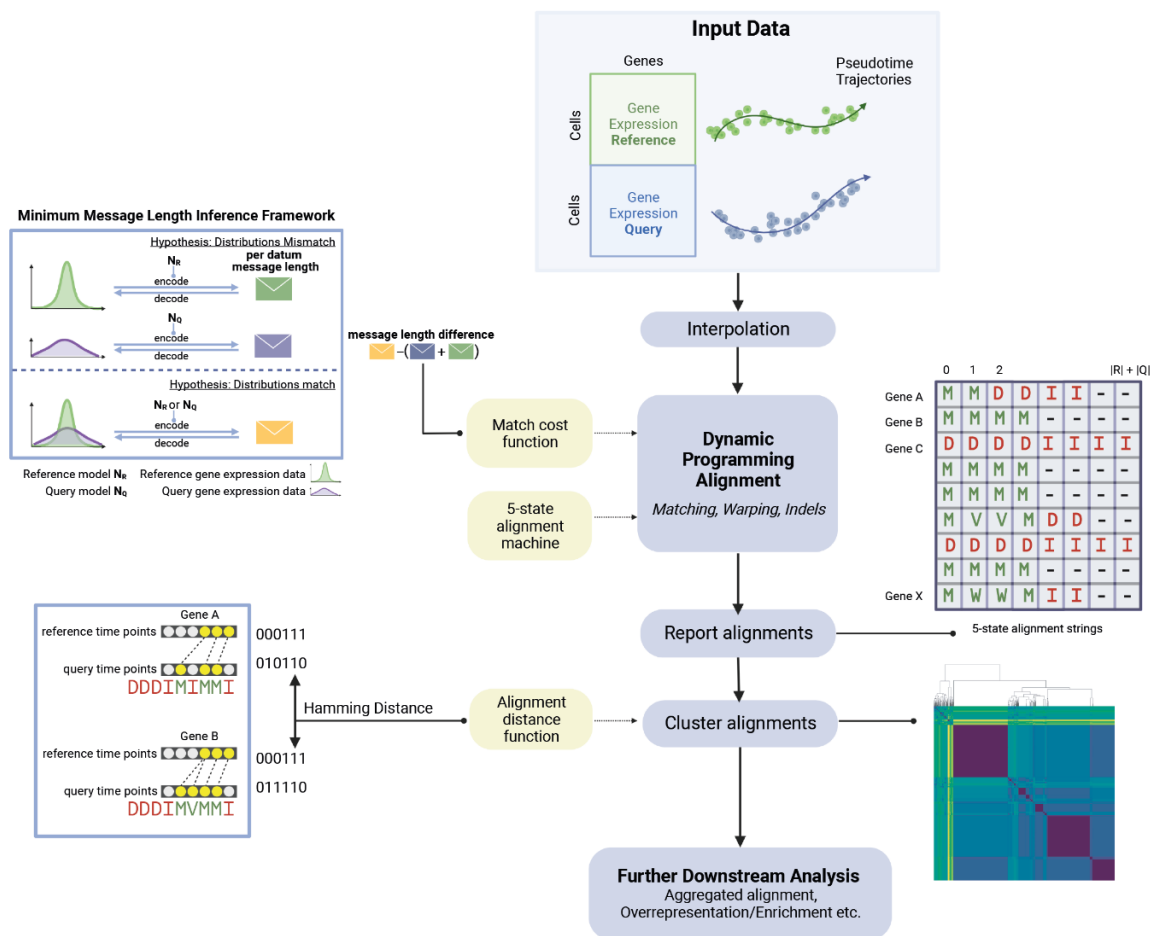

518

519 **Fig. 2 | Overview of the Genes2Genes (G2G) alignment framework for comparing**  
520 **single-cell transcriptomic trajectories.** Schematic illustration of G2G workflow. Given  
521 log<sub>1p</sub> normalized cell by gene expression matrices of a reference (R) and query (Q) system  
522 and their pseudotime estimates, G2G infers individual alignments for a list of genes of  
523 interest. It first interpolates data by extending mean based interpolation in Alpert et al (2018)<sup>5</sup>  
524 to distributional interpolation, and then runs Gotoh's dynamic programming (DP) algorithm<sup>15</sup>  
525 adapted for a five-state alignment machine (**Extended Data Fig. 1a**) defining a match (M),  
526 compression warp (W), expansion warp (V), insertion (I) and deletion (D). All reported  
527 alignments are then clustered and used to deliver statistics on the overall degree of alignment  
528 between R and Q, supporting further downstream analyses. Top left, the DP recurrence  
529 relations utilize a match cost function defined under minimum message length (MML)<sup>21</sup>  
530 statistical inductive inference. Given a hypothesis (a distribution model) and data, MML can  
531 define the total message length of encoding them for lossless compression along an  
532 imaginary message transmission. G2G defines two hypotheses: (1)  $\Phi$ :  $R_j$  and  $Q_i$  time points  
533 mismatch, and (2) A:  $R_j$  and  $Q_i$  time points match. Under  $\Phi$ , the message length is the sum of  
534 independent encoding lengths of their corresponding interpolated expression data and  
535 distributions. Under A, the message length is their joint encoding length of the corresponding  
536 interpolated expression data with a single Gaussian distribution (either of  $R_j$  or  $Q_i$ ). The  
537 match cost is taken as the difference of A and  $\Phi$  per datum encoding lengths. Bottom left,  
538 G2G encodes the five-state alignment strings using a binary scheme and computes a pairwise  
539 Hamming distance matrix to cluster all gene-level alignments. Top right: example output of



540 five-state alignment strings for each gene. Bottom right, example clustermap showcasing the  
541 clustering result of alignment strings. The color represents the pairwise Hamming distance,  
542 and the clustering is performed using Agglomerative hierarchical clustering.

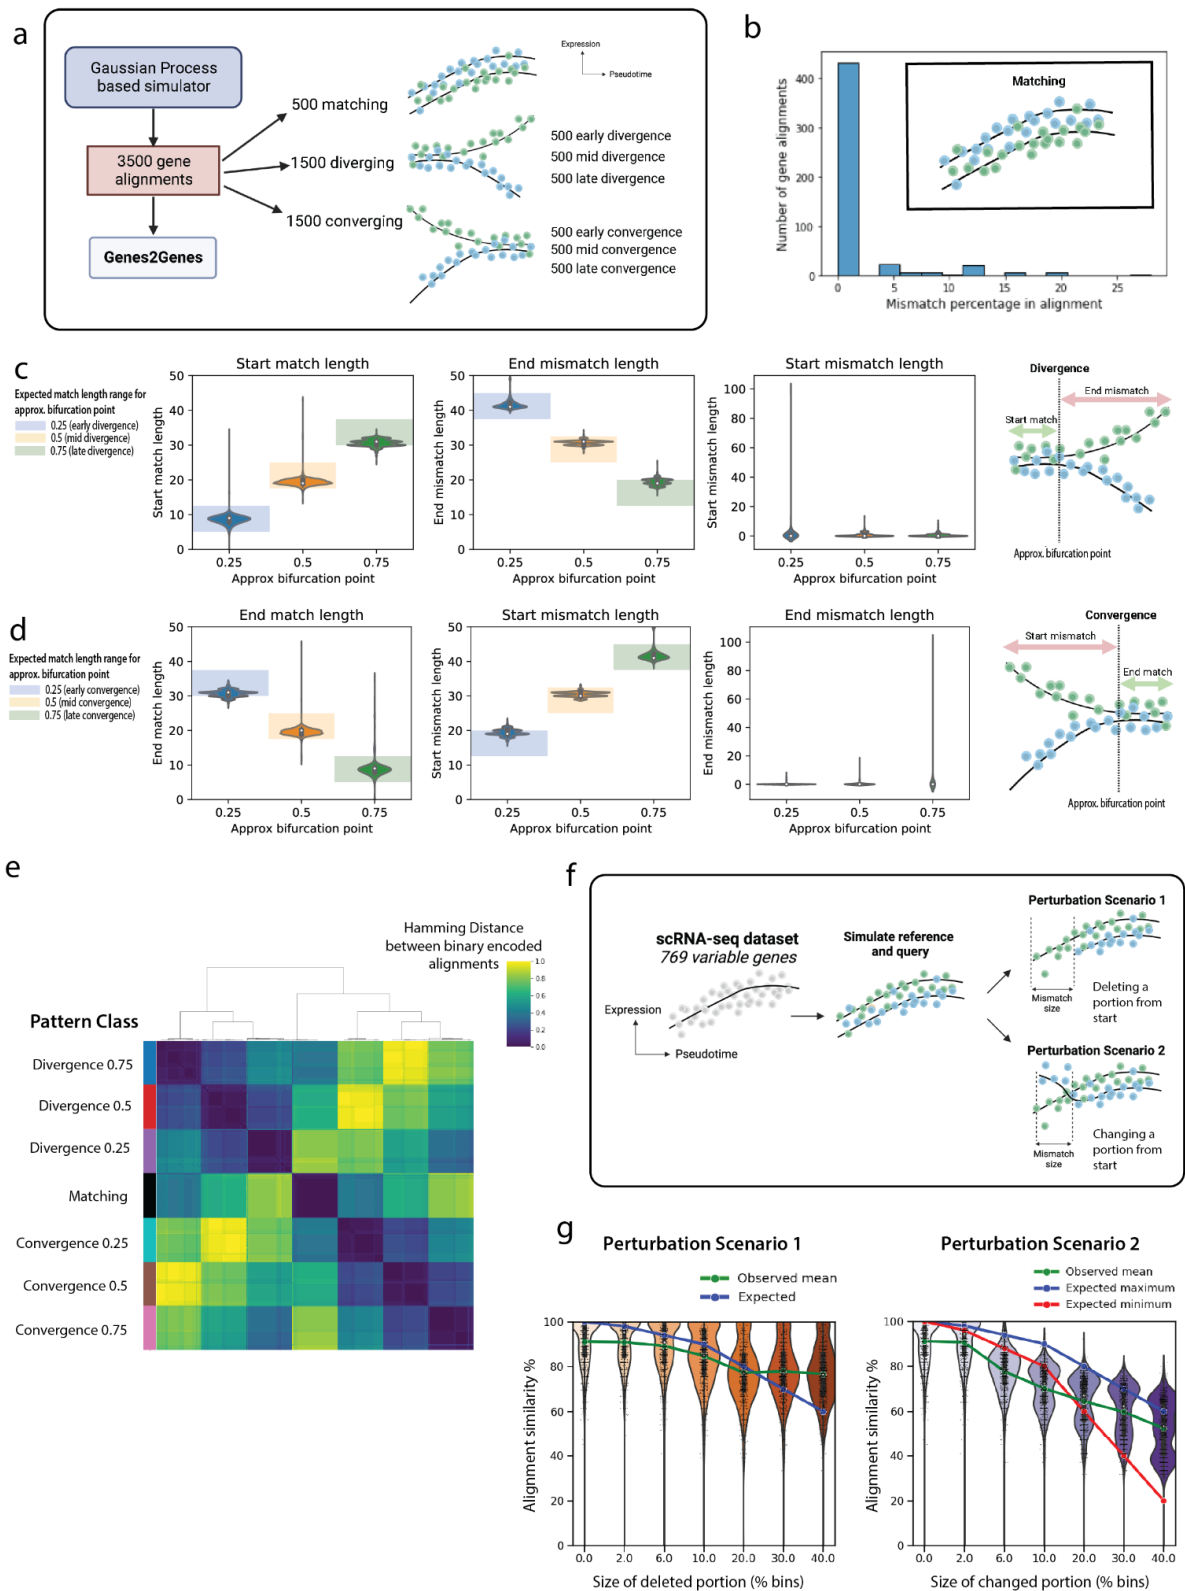

543

544

**Fig. 3 | G2G accurately identifies different patterns of alignment with simulated data**

545

**experiments. a**, Experiment 1 uses a Gaussian Process based simulator to generate 3500

546

simulated pairs of reference and query gene trajectories to test G2G on. These include three

547

main classes of alignment pattern: (1) *Matching*, (2) *Divergence* and (3) *Convergence*. The

548

*Divergence* and *Convergence* groups further sub-categorised based on their approximate

549 location of bifurcation (0.25, 0.5, and 0.75 within [0,1] pseudotime range), resulting in seven  
550 pattern classes (each with 500 alignments). **b**, Alignment frequency histogram of mismatch  
551 percentages observed in the 500 alignments for the simulated *Matching* class. **c**, Distributions  
552 of start match lengths (following a false mismatch if there is any), end mismatch lengths  
553 (prior to a false match if there is any), and start mismatch lengths (number of mismatches  
554 starting from time point 0) in the 1500 *Divergence* alignments across the three bifurcation  
555 subgroups. 50 equispaced time points on pseudotime [0,1] were used for distribution  
556 interpolation and alignment. In the case of early divergence, i.e., bifurcation at 0.25, there are  
557 2 cases showing complete mismatch, i.e., mismatch length of 100. **d**, Distributions of end  
558 match lengths (prior to a false mismatch if there is any), start mismatch lengths (following a  
559 false match if there is any), and end mismatch lengths (number of mismatches before time  
560 point 1) in the 1500 *Convergence* alignments across the three bifurcation subgroups. 50  
561 equispaced time points on pseudotime [0,1] were used for distribution interpolation and  
562 alignment. In the case of late convergence, i.e., bifurcation at 0.75, there are 4 cases showing  
563 complete mismatch, i.e., mismatch length of 100. **e**, The clustergram of the pairwise  
564 Hamming distance matrix across all alignments, which clearly shows the separate classes of  
565 pattern. **f**, Experiment 2 uses the mouse pancreas development dataset (Beta lineage) scRNA-  
566 seq dataset <sup>26</sup> to generate perturbed pairs of alignment from the expected *Matching*  
567 alignments. Perturbation scenario 1 deletes the start region from the reference trajectory,  
568 whereas perturbation scenario 2 changes the start region from the reference trajectory. **g**, The  
569 alignment similarity distributions for varying sizes (percentage of 50 pseudotime bins) of  
570 perturbation under perturbation scenario 1 (left) and perturbation scenario 2 (right). Each  
571 point represents a gene (total number of genes  $n = 769$ ). In each plot, the observed average  
572 alignment similarity across different perturbation sizes is shown by the green line. For  
573 perturbation scenario 1 (left), the blue line shows the expected alignment similarity across  
574 different perturbation sizes. For perturbation scenario 2 (right), there are two expected lines:  
575 maximum (in blue) and minimum (in red). The maximum mismatch length is expected when  
576 both reference and query time points form insertions and deletions, making the maximum  
577 expected length  $size*2$ . The minimum mismatch length is expected when only the changed  
578 reference time points are mismatched as insertions, while the corresponding query time  
579 points are matched to the non-perturbed reference time points (illustrated in **Extended Data**  
580 **Fig. 3b**).

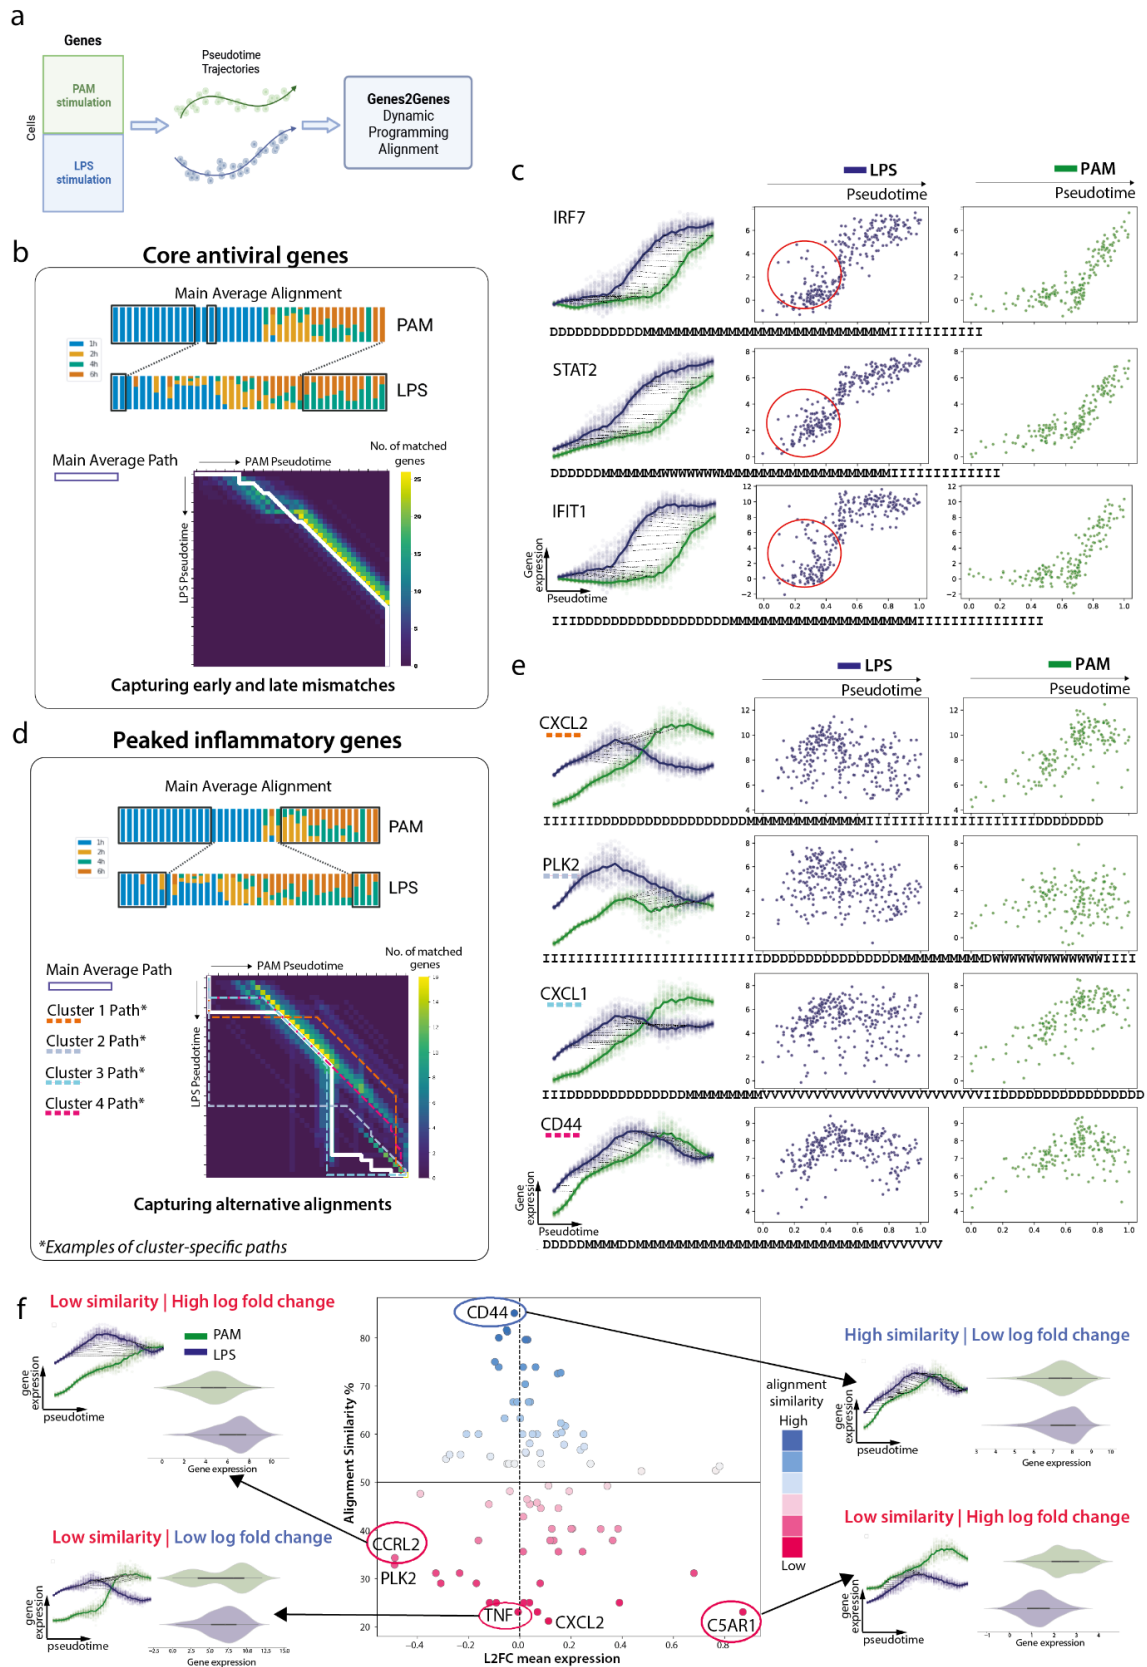

582 **Fig. 4 | G2G captures mismatches and offers gene-level resolution alignment.** **a**, G2G  
583 alignment was performed on a time-course data<sup>23</sup> of murine bone marrow-derived dendritic  
584 cells stimulated with PAM or LPS. Both the gene expression data and the inferred  
585 pseudotime were taken from Alpert et al. 2018<sup>5</sup>. **b**, Top: schematic illustration of the  
586 aggregate alignment result for all the genes in the “core antiviral module”. The stacked bar  
587 plots represent the cell compositions at each time point (50 equispaced time points on  
588 pseudotime [0,1]), colored by the time of sampling post stimulation. Boxed segments  
589 represent mismatched time points. The black dashed lines represent matches and warps  
590 between time points. Bottom: pairwise time point matrix between PAM and LPS pseudotime.  
591 The color represents the number of genes showing match or warp for the given pair of a PAM  
592 time point and an LPS time point. The white line represents the main average alignment path.  
593 **c**, Gene expression plots for three representative genes (*IRF7*, *STAT2* and *IFIT1*) from the  
594 “core antiviral module” in LPS-stimulated (blue) and PAM-stimulated (green) data along  
595 their pseudotime. Left column: the interpolated log<sub>1p</sub> normalized expression (*y*-axis) against  
596 pseudotime (*x*-axis). The bold lines represent mean expression trends, while the faded data  
597 points are 50 random samples from the estimated expression distribution at each time point.  
598 The black dashed lines represent matches and warps between time points. Right two columns:  
599 the actual log<sub>1p</sub> normalized expression (*y*-axis) against pseudotime (*x*-axis). Each point  
600 represents a cell. The five-state alignment string for each gene is shown below the expression  
601 plots. Red circles highlight the cells with high expression values at early time points, which  
602 are referred to as ‘precocious expressers’. **d**, The same plots as in **b** for genes in the “peaked  
603 inflammatory module”. In the pairwise time point matrix, the white line represents the main  
604 average alignment path. The genes are also clustered based on their alignment results  
605 (**Extended Data Fig. 5**), and dashed lines with different colors represent examples of cluster-  
606 specific alignment paths. **e**, The same plots as in **c** for a representative gene from each cluster  
607 shown in **d**. **f**, Plot of alignment similarity (*y*-axis) against log<sub>2</sub> fold change of mean  
608 expression (*x*-axis) for all genes in the “peaked inflammatory module” (middle). The color  
609 also represents the alignment similarity. The surrounding plots show the interpolated log<sub>1p</sub>  
610 normalized expression (*y*-axis) against pseudotime (*x*-axis) on the left, and the violin plot of  
611 total gene expression on the right for four selected genes (*CD44*, *CCRL2*, *TNF*, *C5AR1*).

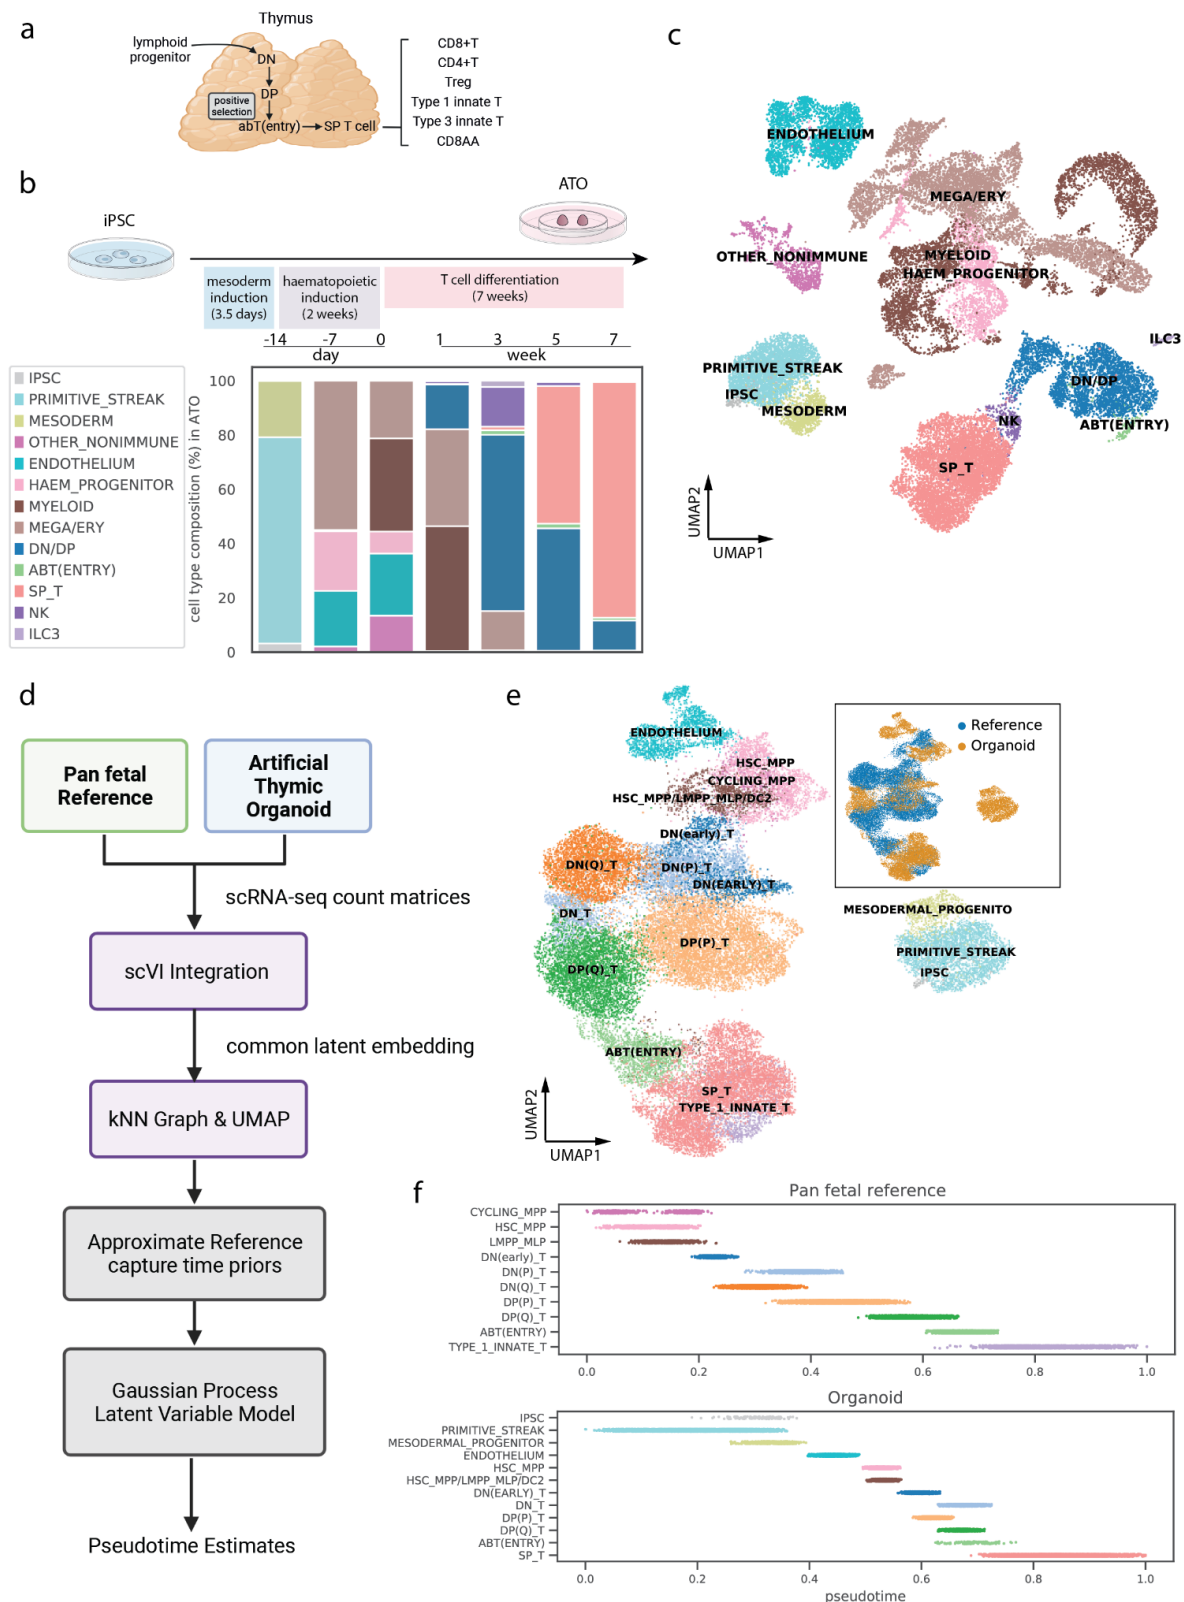

612

613 **Fig. 5 | *in vivo, in vitro* human T cell development data integration and pseudotime**  
 614 **inference.** **a**, Schematic illustration of T cell development in the human thymus. **b**, Top:  
 615 schematic showing the experimental set-up of T cell differentiation from iPSCs in ATOs.  
 616 Bottom: barplot of cell type composition in ATO at different time points during  
 617 differentiation. **c**, UMAP visualization of different cell types in the ATO dataset (low-level

618 annotation, number of cells  $n = 31,483$ ), with more refined annotation in **Extended Data Fig.**  
619 **7a. d**, Workflow of integrating *in vitro* (i.e. ATO) and *in vivo* (i.e. pan fetal reference from  
620 Suo et al. 2022<sup>30</sup>) human T cell development data and pseudotime inference using GPLVM.  
621 **e**, Main: UMAP visualization of integrated *in vivo* and *in vitro* human T cell development  
622 data, colored by the cell types. Right insert: the same UMAP visualization colored by the data  
623 source. **f**, Stripplot of the inferred pseudotime ( $x$ -axis) against different cell types ( $y$ -axis),  
624 colored by the cell types, of *in vivo* pan fetal reference data (top) and *in vitro* organoid data  
625 (bottom).

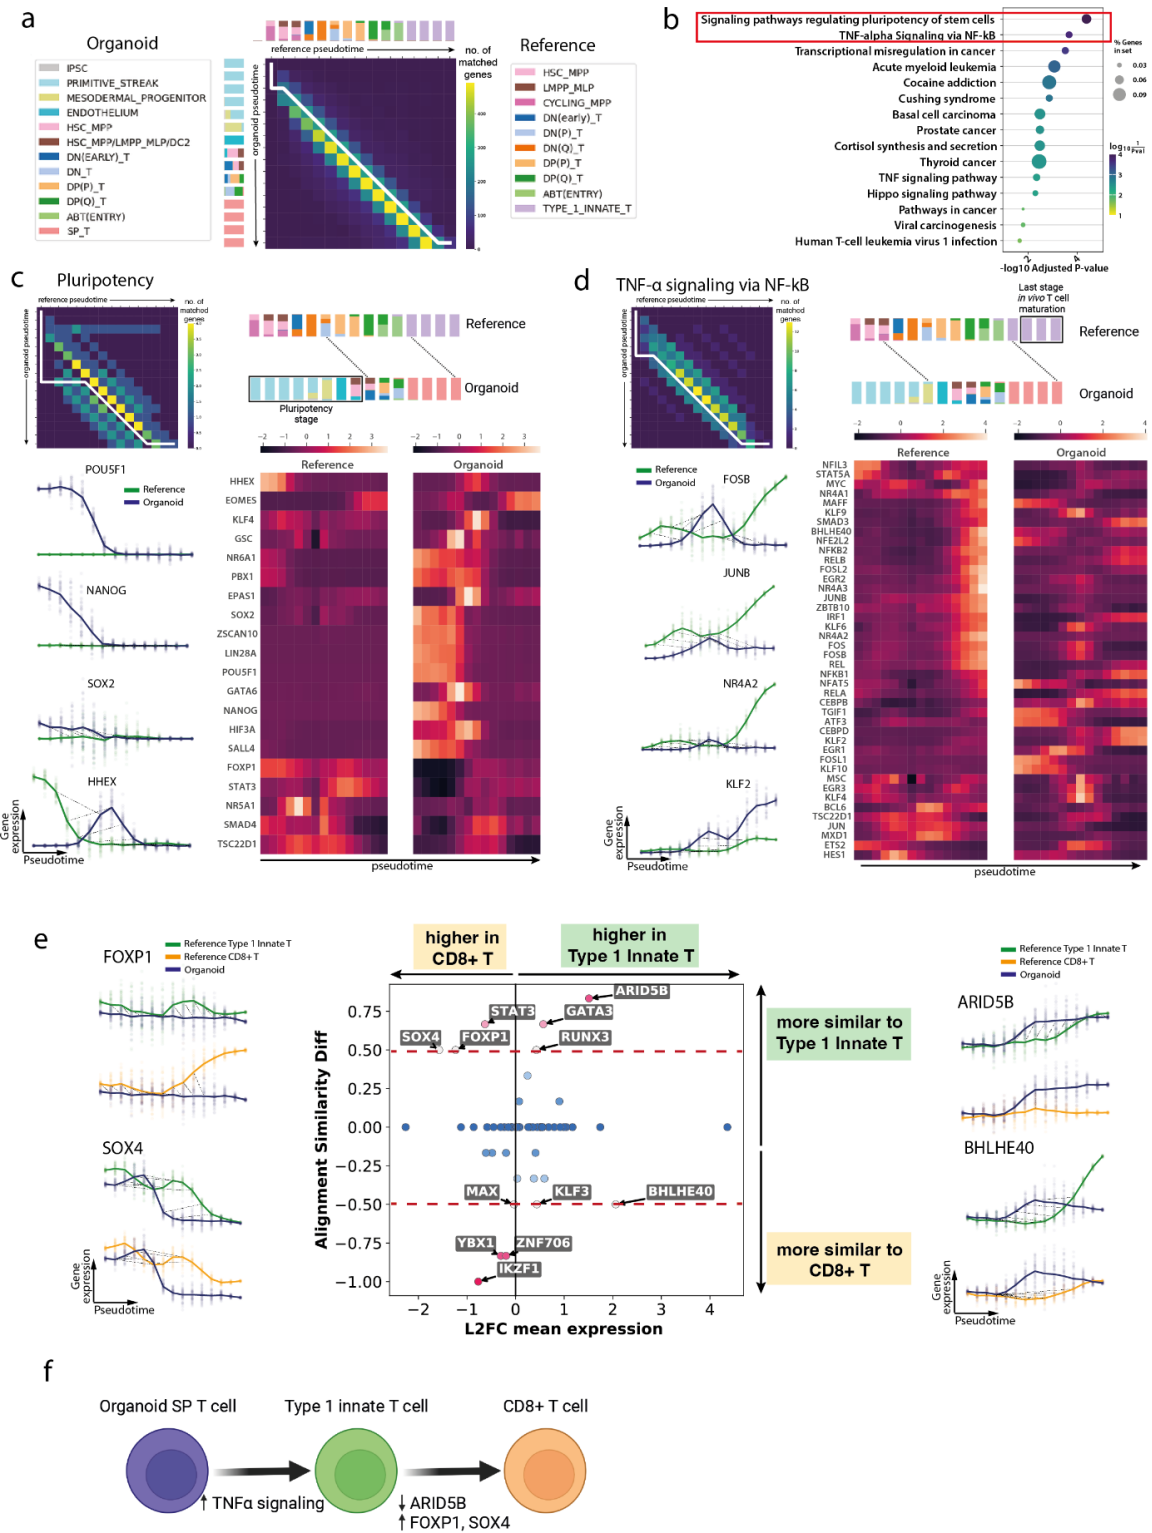



627 **Fig. 6 | *in vivo, in vitro* human T cell development alignment with G2G.** **a**, Aggregate  
628 alignment result for all TFs between *in vitro* organoid (i.e. ATO) and *in vivo* reference (i.e.  
629 pan fetal reference from Suo et al. 2022<sup>30</sup>) human T cell development data shown in the  
630 pairwise time point matrix between organoid and reference pseudotime. The color represents  
631 the number of genes showing match or warp for the given pair of an organoid time point and  
632 a reference time point. The white line represents the main average alignment path. The  
633 stacked bar plots represent the cell compositions at each time point (15 equispaced time  
634 points on pseudotime [0,1]), colored by the cell types, for reference (top) and organoid (left)  
635 separately. **b**, Gene set overrepresentation results of the most mismatched genes from  
636 alignment in **a**, with the gene set names in *y*-axis, and  $-\log_{10}(\text{adjusted P-value})$  in *x*-axis. The  
637 size of the point represents the percentage of genes from that gene set being within the list of  
638 most mismatched genes. The color represents the  $-\log_{10}(\text{adjusted P-value})$ . Two most  
639 significant gene sets were boxed in red. **c**, Alignment results for all genes in the pluripotency  
640 signaling pathway. Top left: pairwise time point matrix between organoid and reference  
641 pseudotime. The color represents the number of genes showing match or warp for the given  
642 pair of an organoid time point and a reference time point. The white line represents the main  
643 average alignment path. Top right: schematic illustration of the aggregate alignment result.  
644 The stacked bar plots represent the cell compositions at each time point, colored by the cell  
645 types. The black dashed lines represent matches and warps between time points. Boxed  
646 segment represents the mismatched pluripotency stage in the organoid. Bottom left: the  
647 interpolated  $\log_{1p}$  normalized expression (*y*-axis) against pseudotime (*x*-axis) for selected  
648 genes. Bottom right: heatmap of the smoothed (interpolated) and *z*-normalized mean gene  
649 expression along the pseudotime. **d**, The same plots as in **c** for all genes in the TNF $\alpha$   
650 signaling via NF $\kappa$ B pathway. The boxed segment in the right top plot represents the  
651 mismatched last stage *in vivo* T cell maturation. **e**, Plots showing the alignment differences  
652 between *in vivo* conventional CD8<sup>+</sup>T lineage *versus in vitro* organoid, and *in vivo* type 1  
653 innate T cell lineage *versus in vitro* organoid. Middle: plot of alignment similarity difference  
654 (*y*-axis) against  $\log_2$  fold change of mean expression between CD8<sup>+</sup>T and type 1 innate T  
655 cells (*x*-axis). The color reflects the absolute value of alignment similarity difference.  
656 Surrounding plots: the interpolated  $\log_{1p}$  normalized expression (*y*-axis) against pseudotime  
657 (*x*-axis) showing the alignment between *in vivo* type 1 innate T cell lineage (green) and *in*  
658 *vitro* organoid (blue) (top), and the alignment between *in vivo* CD8<sup>+</sup>T lineage (orange) and *in*  
659 *vitro* organoid (blue) (bottom), for four selected genes. **f**, Schematic illustration of potential  
660 targets for further optimization of *in vitro* T cell differentiation towards either type 1 innate T  
661 cells or conventional CD8<sup>+</sup>T cells.

## 662 **References**

- 663 1. Schier, A. F. Single-cell biology: beyond the sum of its parts. *Nat. Methods* **17**, 17–20 (2020).
- 664 2. Saelens, W., Cannoodt, R., Todorov, H. & Saeys, Y. A comparison of single-cell trajectory  
665 inference methods. *Nat. Biotechnol.* **37**, 547–554 (2019).
- 666 3. Bellman, R. The theory of dynamic programming. *Bulletin of the American Mathematical*  
667 *Society* vol. 60 503–515 Preprint at <https://doi.org/10.1090/s0002-9904-1954-09848-8> (1954).
- 668 4. Aach, J. & Church, G. M. Aligning gene expression time series with time warping algorithms.  
669 *Bioinformatics* **17**, 495–508 (2001).
- 670 5. Alpert, A., Moore, L. S., Dubovik, T. & Shen-Orr, S. S. Alignment of single-cell trajectories to  
671 compare cellular expression dynamics. *Nat. Methods* **15**, 267–270 (2018).
- 672 6. Alpert, A. *et al.* Alignment of single-cell trajectories by tuMap enables high-resolution  
673 quantitative comparison of cancer samples. *Cell Syst* **13**, 71–82.e8 (2022).
- 674 7. Do, V. H. *et al.* Dynamic pseudo-time warping of complex single-cell trajectories. Preprint at  
675 <https://doi.org/10.1101/522672>.
- 676 8. Sugihara, R., Kato, Y., Mori, T. & Kawahara, Y. Alignment of single-cell trajectory trees with  
677 CAPITAL. *Nat. Commun.* **13**, 5972 (2022).
- 678 9. Cacchiarelli, D. *et al.* Aligning Single-Cell Developmental and Reprogramming Trajectories  
679 Identifies Molecular Determinants of Myogenic Reprogramming Outcome. *Cell Systems* vol. 7  
680 258–268.e3 Preprint at <https://doi.org/10.1016/j.cels.2018.07.006> (2018).
- 681 10. Tritschler, S. *et al.* Concepts and limitations for learning developmental trajectories from single  
682 cell genomics. *Development* **146**, (2019).
- 683 11. Laidlaw, R. F., Briggs, E. M., Matthews, K. R., McCulloch, R. & Otto, T. D. TrAGEDy:  
684 Trajectory Alignment of Gene Expression Dynamics. Preprint at  
685 <https://doi.org/10.1101/2022.12.21.521424>.
- 686 12. Sankoff, D. & Kruskal, J. B. *Time Warps, String Edits, and Macromolecules: The Theory and*  
687 *Practice of Sequence Comparison*. (Addison-Wesley, 1983).
- 688 13. Chen, L. Similarity search over time series and trajectory data.

- 689 <https://www.academia.edu/download/30803148/thesis-leichen.pdf>.
- 690 14. Needleman, S. B. & Wunsch, C. D. A General Method Applicable to the Search for Similarities  
691 in the Amino Acid Sequence of Two Proteins. *Molecular Biology* 453–463 Preprint at  
692 <https://doi.org/10.1016/b978-0-12-131200-8.50031-9> (1989).
- 693 15. Gotoh, O. An improved algorithm for matching biological sequences. *Journal of Molecular*  
694 *Biology* vol. 162 705–708 Preprint at [https://doi.org/10.1016/0022-2836\(82\)90398-9](https://doi.org/10.1016/0022-2836(82)90398-9) (1982).
- 695 16. Vintsyuk, T. K. Speech discrimination by dynamic programming. *Cybernetics* vol. 4 52–57  
696 Preprint at <https://doi.org/10.1007/bf01074755> (1972).
- 697 17. Allison, L., Wallace, C. S. & Yee, C. N. Finite-state models in the alignment of macromolecules.  
698 *J. Mol. Evol.* **35**, 77–89 (1992).
- 699 18. Durbin, R. *et al. Biological Sequence Analysis: Probabilistic Models of Proteins and Nucleic*  
700 *Acids*. (Cambridge University Press, 1998).
- 701 19. Sumanaweera, D., Allison, L. & Konagurthu, A. S. Statistical compression of protein sequences  
702 and inference of marginal probability landscapes over competing alignments using finite state  
703 models and Dirichlet priors. *Bioinformatics* **35**, i360–i369 (2019).
- 704 20. Wallace, C. S. & Boulton, D. M. An Information Measure for Classification. *The Computer*  
705 *Journal* vol. 11 185–194 Preprint at <https://doi.org/10.1093/comjnl/11.2.185> (1968).
- 706 21. Wallace, C. S. & Freeman, P. R. Estimation and Inference by Compact Coding. *Journal of the*  
707 *Royal Statistical Society: Series B (Methodological)* vol. 49 240–252 Preprint at  
708 <https://doi.org/10.1111/j.2517-6161.1987.tb01695.x> (1987).
- 709 22. Wallace, C. S. *Statistical and Inductive Inference by Minimum Message Length*. (Springer  
710 Science & Business Media, 2005).
- 711 23. Shalek, A. K. *et al.* Single-cell RNA-seq reveals dynamic paracrine control of cellular variation.  
712 *Nature* **510**, 363–369 (2014).
- 713 24. Penfold, C. A. *et al.* Branch-recombinant Gaussian processes for analysis of perturbations in  
714 biological time series. *Bioinformatics* vol. 34 i1005–i1013 Preprint at  
715 <https://doi.org/10.1093/bioinformatics/bty603> (2018).
- 716 25. Website. Wilson, Andrew Gordon. n.d. ‘The Change Point Kernel.’ Accessed February 7, 2023.

- 717 <http://www.cs.cmu.edu/~andrewgw/changepoints.pdf>.
- 718 26. Bastidas-Ponce, A. *et al.* Comprehensive single cell mRNA profiling reveals a detailed roadmap  
719 for pancreatic endocrinogenesis. *Development* **146**, (2019).
- 720 27. Otero, K. *et al.* Nonredundant role of CCRL2 in lung dendritic cell trafficking. *Blood* **116**, 2942–  
721 2949 (2010).
- 722 28. Schioppa, T. *et al.* Molecular Basis for CCRL2 Regulation of Leukocyte Migration. *Front Cell*  
723 *Dev Biol* **8**, 615031 (2020).
- 724 29. Park, J.-E. *et al.* A cell atlas of human thymic development defines T cell repertoire formation.  
725 *Science* **367**, (2020).
- 726 30. Suo, C. *et al.* Mapping the developing human immune system across organs. *Science* **376**,  
727 eabo0510 (2022).
- 728 31. Montel-Hagen, A. *et al.* Organoid-Induced Differentiation of Conventional T Cells from Human  
729 Pluripotent Stem Cells. *Cell Stem Cell* **24**, 376–389.e8 (2019).
- 730 32. Domínguez Conde, C. *et al.* Cross-tissue immune cell analysis reveals tissue-specific features in  
731 humans. *Science* **376**, eabl5197 (2022).
- 732 33. Lopez, R., Regier, J., Cole, M. B., Jordan, M. I. & Yosef, N. Deep generative modeling for  
733 single-cell transcriptomics. *Nat. Methods* **15**, 1053–1058 (2018).
- 734 34. Titsias, M. & Lawrence, N. D. Bayesian Gaussian Process Latent Variable Model. in  
735 *Proceedings of the Thirteenth International Conference on Artificial Intelligence and Statistics*  
736 844–851 (PMLR, 13--15 May 2010).
- 737 35. Kumasaka, N. *et al.* Mapping interindividual dynamics of innate immune response at single-cell  
738 resolution. Preprint at <https://doi.org/10.1101/2021.09.01.457774>.
- 739 36. Lalchand, V. *et al.* Modelling Technical and Biological Effects in scRNA-seq data with Scalable  
740 GPLVMs. in *Proceedings of the 17th Machine Learning in Computational Biology meeting*  
741 (2022).
- 742 37. Ahmed, S., Rattray, M. & Boukouvalas, A. GrandPrix: Scaling up the Bayesian GPLVM for  
743 single-cell data. *Bioinformatics* **35**, (2018).
- 744 38. Verma, A. & Engelhardt, B. E. A robust nonlinear low-dimensional manifold for single cell

- 745 RNA-seq data. Preprint at <https://doi.org/10.1101/443044>.
- 746 39. Lönnberg, T. *et al.* Single-cell RNA-seq and computational analysis using temporal mixture  
747 modelling resolves Th1/Tfh fate bifurcation in malaria. *Sci Immunol* **2**, (2017).
- 748 40. Lambert, S. A. *et al.* The Human Transcription Factors. *Cell* **175**, 598–599 (2018).
- 749 41. Niwa, H. How is pluripotency determined and maintained? *Development* **134**, 635–646 (2007).
- 750 42. Bedford, F. K., Ashworth, A., Enver, T. & Wiedemann, L. M. HEX: a novel homeobox gene  
751 expressed during haematopoiesis and conserved between mouse and human. *Nucleic Acids Res.*  
752 **21**, 1245–1249 (1993).
- 753 43. Jackson, J. T. *et al.* Hhex Regulates Hematopoietic Stem Cell Self-Renewal and Stress  
754 Hematopoiesis via Repression of Cdkn2a. *Stem Cells* **35**, 1948–1957 (2017).
- 755 44. Hosokawa, H. & Rothenberg, E. V. How transcription factors drive choice of the T cell fate. *Nat.*  
756 *Rev. Immunol.* **21**, 162–176 (2021).
- 757 45. Webb, L. V., Ley, S. C. & Seddon, B. TNF activation of NF- $\kappa$ B is essential for development of  
758 single-positive thymocytes. *J. Exp. Med.* **213**, 1399–1407 (2016).
- 759 46. Xing, Y., Wang, X., Jameson, S. C. & Hogquist, K. A. Late stages of T cell maturation in the  
760 thymus involve NF- $\kappa$ B and tonic type I interferon signaling. *Nat. Immunol.* **17**, 565–573 (2016).
- 761 47. Mo, J.-S., Park, H. W. & Guan, K.-L. The Hippo signaling pathway in stem cell biology and  
762 cancer. *EMBO Rep.* **15**, 642–656 (2014).
- 763 48. Feng, X. *et al.* Foxp1 is an essential transcriptional regulator for the generation of quiescent  
764 naive T cells during thymocyte development. *Blood* **115**, 510–518 (2010).
- 765 49. Kaminskiy, Y., Kuznetsova, V., Kudriaeva, A., Zmievskaia, E. & Bulatov, E. Neglected, yet  
766 significant role of FOXP1 in T-cell quiescence, differentiation and exhaustion. *Front. Immunol.*  
767 **13**, 971045 (2022).
- 768 50. Cichocki, F. *et al.* ARID5B regulates metabolic programming in human adaptive NK cells. *J.*  
769 *Exp. Med.* **215**, 2379–2395 (2018).
- 770 51. Cook, M. E., Jarjour, N. N., Lin, C.-C. & Edelson, B. T. Transcription Factor Bhlhe40 in  
771 Immunity and Autoimmunity. *Trends Immunol.* **41**, 1023–1036 (2020).
- 772 52. Verleysen, M. & François, D. The Curse of Dimensionality in Data Mining and Time Series

- 773 Prediction. *Computational Intelligence and Bioinspired Systems* 758–770 Preprint at  
774 [https://doi.org/10.1007/11494669\\_93](https://doi.org/10.1007/11494669_93) (2005).
- 775 53. Garfinkel, A., Shevtsov, J. & Guo, Y. *Modeling Life: The Mathematics of Biological Systems*.  
776 (Springer, 2017).
- 777 54. Shannon, C. E. A Mathematical Theory of Communication. *Bell System Technical Journal* vol.  
778 27 623–656 Preprint at <https://doi.org/10.1002/j.1538-7305.1948.tb00917.x> (1948).
- 779 55. Allison, L. Coding Ockham’s Razor. Springer Preprint at [https://doi.org/10.1007/978-3-319-](https://doi.org/10.1007/978-3-319-76433-7)  
780 76433-7 (2018).
- 781 56. Collier, J. H. Statistical inductive inference of protein structural alignments. (Monash University,  
782 2016).
- 783 57. Conway, J. H. & Sloane, N. J. A. On the Voronoi Regions of Certain Lattices. *SIAM Journal on*  
784 *Algebraic Discrete Methods* vol. 5 294–305 Preprint at <https://doi.org/10.1137/0605031> (1984).
- 785 58. Rajapaksa, S. *et al.* On the reliability and the limits of inference of amino acid sequence  
786 alignments. *Bioinformatics* **38**, i255–i263 (2022).
- 787 59. Chen, E. Y. *et al.* Enrichr: interactive and collaborative HTML5 gene list enrichment analysis  
788 tool. *BMC Bioinformatics* vol. 14 Preprint at <https://doi.org/10.1186/1471-2105-14-128> (2013).
- 789 60. Fang, Z., Liu, X. & Peltz, G. GSEAPy: a comprehensive package for performing gene set  
790 enrichment analysis in Python. *Bioinformatics* **39**, (2023).
- 791 61. Liberzon, A. *et al.* The Molecular Signatures Database (MSigDB) hallmark gene set collection.  
792 *Cell Syst* **1**, 417–425 (2015).
- 793 62. Kanehisa, M., Furumichi, M., Sato, Y., Ishiguro-Watanabe, M. & Tanabe, M. KEGG: integrating  
794 viruses and cellular organisms. *Nucleic Acids Research* vol. 49 D545–D551 Preprint at  
795 <https://doi.org/10.1093/nar/gkaa970> (2021).
- 796 63. Lange, M. *et al.* CellRank for directed single-cell fate mapping. *Nat. Methods* **19**, 159–170  
797 (2022).
- 798 64. Cannoodt, R., Saelens, W., Deconinck, L. & Saeys, Y. Spearheading future omics analyses using  
799 dynngen, a multi-modal simulator of single cells. *Nat. Commun.* **12**, 1–9 (2021).
- 800 65. Wolock, S. L., Lopez, R. & Klein, A. M. Scrublet: Computational Identification of Cell Doublets

- 801 in Single-Cell Transcriptomic Data. *Cell Syst* **8**, 281–291.e9 (2019).
- 802 66. Heaton, H. *et al.* Souporecell: robust clustering of single-cell RNA-seq data by genotype without  
803 reference genotypes. *Nat. Methods* **17**, 615–620 (2020).
- 804 67. Tirosh, I. *et al.* Dissecting the multicellular ecosystem of metastatic melanoma by single-cell  
805 RNA-seq. *Science* **352**, 189–196 (2016).
- 806 68. Wolf, F. A., Angerer, P. & Theis, F. J. SCANPY: large-scale single-cell gene expression data  
807 analysis. *Genome Biol.* **19**, 15 (2018).
- 808 69. Website. Bingham, Eli, Jonathan P. Chen, Martin Jankowiak, Fritz Obermeyer, Rohit Singh,  
809 Paul Szerlip, Paul Horsfall, Noah D. Goodman, Neeraj Pradhan, and Theofanis Karaletsos. 2019.  
810 ‘Pyro: Deep Universal Probabilistic Programming.’ *Journal of Machine Learning Research:*  
811 *JMLR.* <https://www.jmlr.org/papers/volume20/18-403/18-403.pdf>.
- 812 70. Polański, K. *et al.* BBKNN: fast batch alignment of single cell transcriptomes. *Bioinformatics*  
813 **36**, 964–965 (2020).

## 814 **Methods**

815

### 816 **Genes2Genes (G2G): A new alignment framework for single-cell trajectories**

817 As described in the main text, Genes2Genes performs dynamic programming (DP) alignment  
818 independently for all genes of interest, between a reference trajectory  $R$  and a query trajectory  
819  $Q$ . In other words, each gene-level (i.e. gene-specific) trajectory alignment is an independent  
820 DP task of pairwise time series alignment. The aim is to generate an optimal sequence of  
821 matched time point pairs and mismatched time point pairs between  $R$  and  $Q$  for each gene. As  
822 illustrated in **Fig. 1b**, there are five different alignment states which denote these matches and  
823 mismatches between two time points. For each time point in any gene trajectory, there is a  
824 respective expression distribution, as explained by an observed dataset of single-cell (scRNA-  
825 seq) measurements. G2G evaluates the similarities of these reference and query expression  
826 distributions over time, to determine a match or mismatch between their time points.

827

828 The following sections introduce the problem of pairwise time series alignment, and describe  
829 the main components of our G2G framework (**Fig. 2**) which operate together to produce  
830 optimal gene-specific alignments.

831

### 832 **Pairwise time series alignment for trajectory comparison**

833 A trajectory is a continuous path of change through some feature space, along some axis of  
834 progression (such as time)<sup>53</sup>. In single-cell transcriptomics, this feature space is usually  
835 defined by genes, and a trajectory through a high-dimensional gene space can describe the  
836 transcriptomic state of a cell as a function of time. A temporal (e.g. pseudotime) ordering of a  
837 set of single cells represents a discretization of the respective cell state trajectory, and their  
838 entire gene expression dataset forms a multivariate time series. On the other hand, their  
839 expression of a single gene forms a univariate time series. In this work, we consider a  
840 pairwise alignment of univariate time series, which allows us to perform gene-specific  
841 trajectory alignment.

842

843 Given two time series (sequences), reference  $R$  and query  $Q$  of length (i.e. a finite number of  
844 time points)  $|R|$  and  $|Q|$ , their pairwise alignment describes sequential correspondences  
845 between their time points. As an optimization problem, computational alignment has two key  
846 properties: (1) an optimal substructure, and (2) overlapping set of subproblems, which make  
847 it dynamic programmable (DP)<sup>3</sup>. Property (1) means, the optimal alignment of any two  
848 prefixes  $R_{1..j}$  and  $Q_{1..i}$  depends on the optimality of three sub-alignments: (i)  $R_{1..j-1}$  and  
849  $Q_{1..i-1}$ , (ii)  $R_{1..j-1}$  and  $Q_{1..i}$ , and (iii)  $R_{1..j}$  and  $Q_{1..i-1}$ . Property (2) means, there exists  
850 subproblems (prefix alignments) that are overlapping. DP begins optimizing the alignment of  
851 prefixes, starting from null ( $\Phi$ ) sequences until it completes an alignment of the entire two  
852 sequences. During this process, it computes overlapping subproblems only once and reuses  
853 them through a memoization (history) matrix  $H$ . In the standard DP alignment algorithm, any  
854 cell  $(i, j)$  in  $H$  stores the optimal alignment cost of the two prefix sequences:  $R_{1..j}$  and  $Q_{1..i}$ , by  
855 optimizing an objective function which quantifies the alignment through a set of recurrence  
856 relations. Once all  $H$  matrix cells are computed, the optimal alignment can be retrieved by



857 backtracking, starting from the right-most bottom cell ( $|Q| + 1, |R| + 1$ ) until reaching the  
 858 matrix cell  $(0,0)$ . The time complexity of this algorithm depends on how its alignment  
 859 scoring scheme is designed. (The standard scheme has a quadratic complexity to find the best  
 860 alignment out of the factorially growing all possible number of alignments).

861

## 862 **Preprocessing a trajectory time series by distributional interpolation**

863 Interpolation is a necessary preprocessing step that a time series has to undergo prior to  
 864 taking part in an alignment. This is to ensure smoothly changing and uniformly distributed  
 865 data that are in phase (i.e. having the same rate of sampling) at least approximately; otherwise  
 866 a reliable alignment cannot be guaranteed<sup>5,12</sup>. Here we chose to extend the mean gene  
 867 expression based interpolation method used by CellAlign<sup>5</sup> to a distributional interpolation, for  
 868 preprocessing a reference and query time series of gene expression before their alignment.

869

870 Given a pseudotime series  $t$  of (log1p normalized) expression in some gene  $g_j$  of a single-  
 871 cell dataset, our distributional interpolation method first min-max-normalizes the pseudotime  
 872 of  $t$  as to be in the range of  $[0,1]$ . Then,  $m$  equally spaced artificial (interpolated) time points  
 873 are determined within  $[0,1]$ , where for each artificial time point  $t'$ , we estimate a Gaussian  
 874 distribution (of mean  $g_j(t')_{mean}$  and standard deviation  $g_j(t')_{std}$ ) by using the Gaussian  
 875 kernel-based weighted approach. For each cell  $i$  annotated with pseudotime  $t_i$ , an associated  
 876 weight is computed w.r.t each artificial time point  $t'$  as:

$$877 \quad w_i = \exp\left(-\frac{(t_i - t')^2}{window\_size^2}\right)$$

878 , where default  $window\_size = 0.1$ . The below equations are then used to compute the  
 879 Gaussian distribution parameters  $g_j(t')_{mean}$  and  $g_j(t')_{std}$  :

$$880 \quad g_j(t')_{mean} = \frac{1}{\sum w_i} \sum_{i=1}^n w_i g_j(t_i)$$

$$881 \quad g_j(t')_{std} = c_{t'} \sqrt{n \frac{\sum_{i=1}^n w_i [g_j_{mean} - g_j(t_i)]^2}{(n-1)\sum w_i}}$$

$$882 \quad \text{where } g_j_{mean} = \frac{\sum_{i=1}^n g_j(t_i)}{n},$$

883

884 ,  $n$  is the total number of cells, and  $c_{t'}$  is the weighted cell density (abundance of cells) at the  
 885 interpolated time point  $t'$ . The weighted cell density computed as:

$$886 \quad c_{t'} = \frac{\sum_{i=1}^n w_i}{n},$$

887 is the expected weight of a cell at  $t'$ . A higher expected weight is indicative of a higher cell  
 888 density. This way, we account for cell abundance when deciding the variance for the  
 889 interpolated point (otherwise with a very low number of cells, we may get a very high  
 890 variance). Next, we generate  $k = 50$  random data points from the Gaussian distribution  
 891  $N(g_j(t')_{mean}, g_j(t')_{std})$  for each interpolated time  $t'$ , representing the interpolated  
 892 distribution of single-cell gene expression. Note: In this work, we use a fixed number of  
 893 interpolated time points  $m$  for both reference and query. As  $m$  controls the resolution of the

894 alignment, it should suffice to represent the entire trajectory. This interpolation also adds an  
895  $O(nm)$  time complexity due to taking a weighted contribution from all cells at each  $t'$ . To  
896 overcome this, a general solution is to subsample datasets before the analysis and/or to reduce  
897 the number of contributing cells by considering only the nearest neighborhood.

898

899 The reference pseudotime series and query pseudotime series of each gene is preprocessed  
900 using the above described distributional interpolation method. The interpolated time series  
901 are then input to our G2G dynamic programming algorithm as detailed in the next section.

902

### 903 **A new dynamic programming algorithm for time series alignment of a single** 904 **gene**

905 Here we describe a new dynamic programming (DP) algorithm to generate an alignment  
906 between a reference time series  $R$  and query time series  $Q$  of log-normalized expression of a  
907 specified gene. This algorithm jointly adapts Gotoh's sequence alignment<sup>15</sup> with classical  
908 dynamic time warping (DTW)<sup>16</sup> to accommodate five states of alignment (**Fig. 1b**), i.e., one-  
909 to-one match (m), many-to-one warp ( $w_d$ ), one-to-many warp ( $w_i$ ), insertion (i), and deletion  
910 (d) between time points in the two time series. We denote the five-state space as  $\Omega = [m, w_d,$   
911  $w_i, d, i]$ . Our approach unifies matches and mismatches within a single DP algorithm unlike  
912 DTW which only handles matches (including warps).

913

914 The DTW algorithm originated from the speech recognition domain<sup>16</sup> under the family of  
915 dynamic programming algorithms for optimization<sup>3</sup>. It has been extensively used to align  
916 time series with shifts (warps). Sankoff and Kruskal (1983)<sup>12</sup> had previously discussed how  
917 to capture warps and indels both from a single alignment algorithm. They provided a DP  
918 recurrence relation involving evaluations of the five alignment states to decide the optimal  
919 state for each pair of  $R$  and  $Q$  time points when aligning two time series. Extending this idea  
920 further, we implemented the Gotoh's  $O(|R||Q|)$  DP algorithm to generate an optimal five-  
921 state alignment hypothesis for  $R$  and  $Q$  time series by:

922

- 923 • Defining a Bayesian information-theoretic measure of distance between two gene  
924 expression distributions using the minimum message length statistical inductive  
925 inference framework<sup>12,21</sup>.
- 926 • Defining a five-state machine that models state transitions in the alignment hypothesis  
927 across the five different matching and mismatching states, defining one-to-one  
928 matches, warps (i.e. many-to-one compression matches and one-to-many expansion  
929 matches), and insertions-deletions (indels).

929

930 The scoring scheme of the DP algorithm evaluates every pair of reference time point  $j$  and  
931 query time point  $i$  to generate an optimal alignment across all time points. This involves  
932 computing two types of cost: (1) the cost of matching the two time points,  $j$  and  $i$  (denoted by  
933  $Cost_{match}(i, j)$ ) based on their respective (interpolated) gene expression distributions, and  
934 (2) the cost of assigning an alignment state  $x \in \Omega$  for the two time points  $j$  and  $i$ . The  
935 following sections first detail on how we compute these costs, and then describe how our DP  
936 optimization works using this scoring scheme.

937

938 Note: The reference time point  $j$  and query time point  $i$  are also denoted by  $R_j$  and  $Q_i$  in the  
939 main text.

940

## 941 **The DP scoring scheme**

942

### 943 **The cost of match between the reference time point $j$ and query time point $i$**

944 We expect a match between the reference time point  $j$  and query time point  $i$  if they have  
945 similar distributions of gene expression. Thus, to score the likelihood of a match, we define a  
946 distance measure between the two gene expression distributions corresponding to the  $j$  and  $i$   
947 time points, respectively. To compute this distance, we first take the interpolated single-cell  
948 expression datasets at time point  $j$  of  $R$  (denoted by  $R(j)$ ) and time point  $i$  of  $Q$  (denoted by  
949  $Q(i)$ ). We already know the mean ( $\mu$ ) and standard deviation ( $\sigma$ ) statistics for  $R(j)$  and  $Q(i)$   
950 separately, as they were estimated during the time series interpolation step. Thus we define  
951 the Gaussian distribution  $N(\mu_{R(j)}, \sigma_{R(j)})$  for  $R(j)$ , and the Gaussian distribution  
952  $N(\mu_{Q(i)}, \sigma_{Q(i)})$  for  $Q(i)$  using their respective  $\mu$  and  $\sigma$  statistics. Accordingly, if  $D_{R(j)} =$   
953  $[d_1, d_2, \dots, d_{|R(j)|}]$  and  $D_{Q(i)} = [d_1, d_2, \dots, d_{|Q(i)|}]$  are the expression data vectors of the  $R(j)$   
954 and  $Q(i)$  datasets, respectively, then:

$$955 \quad d_k \sim N(\mu_{R(j)}, \sigma_{R(j)}) \quad \forall d_k \in D_{R(j)}$$

$$956 \quad d_k \sim N(\mu_{Q(i)}, \sigma_{Q(i)}) \quad \forall d_k \in D_{Q(i)}$$

957 To be brief, we denote  $N(\mu_{R(j)}, \sigma_{R(j)})$  distribution by  $N_{R(j)}$ , and  $N(\mu_{Q(i)}, \sigma_{Q(i)})$  by  $N_{Q(i)}$ .

958

959 Next, we implement the cost function,  $Cost_{match}(i, j)$ , to consider both:

- 960 1. **Data:**  $D_{R(j)}$  and  $D_{Q(i)}$  expression vectors of the  $R(j)$  and  $Q(i)$  datasets, respectively,
- 961 2. **Models:** Gaussian distributions,  $N_{R(j)}$  and  $N_{Q(i)}$ ,

962 when computing the distance between  $R(j)$  and  $Q(i)$ . To do so, we use the minimum  
963 message length (MML) criterion<sup>21,22</sup> and define a Bayesian information-theoretic distance  
964 measure. **Fig. 2** (top left) illustrates an abstract overview of our MML framework and its  
965 place in the overall G2G alignment framework. **Supplementary Fig. 1a** further expands this  
966 illustration to explain how the  $Cost_{match}(i, j)$  computation works for a pair of reference time  
967 point  $j$  and query time point  $i$ , as detailed by the following sections.

968

### 969 **Primer on minimum message length inference (MML)**

970 MML<sup>20-22</sup> is an inductive inference paradigm for model comparison and selection, grounded  
971 on Bayesian statistics, information and coding theory. It facilitates designing hypothesis test  
972 schemes specific to a problem domain. Given a hypothesis (model)  $H$  and some data  $D$ , it  
973 lays an imaginary message transmission from a sender who jointly encodes  $H$  and  $D$ , aiming  
974 for their lossless decoding at a recipients' side. Bayes theorem defines their joint probability  
975 as:

$$976 \quad Pr(H, D) = Pr(H) \cdot Pr(D|H) = Pr(D) \cdot Pr(H|D).$$

977 Separately, Shannon information defines the optimal length of a message that encodes some  
978 event  $E$  with a probability  $Pr(E)$  as:

979  $I(E) = -\log_e(Pr(E))$   
980 measured in nits, where  $I$  denotes information. By applying the Shannon information<sup>54</sup> to  
981 Bayes theorem, we can map the respective probability elements in  $Pr(H, D) = Pr(H) \cdot$   
982  $Pr(D|H)$  onto the information space, describing the amount of Shannon information needed  
983 to encode  $H$  and  $D$  jointly as:

$$984 \quad I(H, D) = I(H) + I(D|H) \quad - \text{Equation (1)}$$

985 This gives a two-part total message length of encoding  $H$  and  $D$  jointly. The first part  $I(H)$   
986 refers to the message length of encoding the hypothesis  $H$  itself, whereas the second part  
987  $I(D|H)$  refers to the message length of encoding the data points in  $D$  using  $H$ .

988  
989 When there are two hypotheses,  $H_1$  and  $H_2$ , that describe the same data  $D$ , MML enables us  
990 to select the best hypothesis that gives a model-complexity vs. model-fit tradeoff, by  
991 evaluating a compression statistic  $\Delta = I(H_1, D) - I(H_2, D)$ . Here,  $\Delta$  is also the log odds  
992 posterior ratio between the two hypotheses.

$$993 \quad \Delta = \log\left(\frac{Pr(H_2, D)}{Pr(H_1, D)}\right) = \log\left(\frac{Pr(D)Pr(H_2|D)}{Pr(D)Pr(H_1|D)}\right) = \log\left(\frac{Pr(H_2|D)}{Pr(H_1|D)}\right) - \text{Equation (2)}$$

994 If  $\Delta > 0$ , this implies that the hypothesis  $H_2$  is  $e^\Delta$  times more likely than  $H_1$ , and vice versa.

995  
996 ***Casting the cost of matching between reference time point  $j$  and query time point  $i$  under***  
997 ***MML***

998 Given the expression data  $D$  (containing both  $D_{R(j)}$  and  $D_{Q(i)}$ ) and their estimated Gaussian  
999 distributions ( $N(\mu_{R(j)}, \sigma_{R(j)})$  and  $N(\mu_{Q(i)}, \sigma_{Q(i)})$  denoted by  $N_{R(j)}$  and  $N_{Q(i)}$ , respectively),  
1000 we formulate two different hypotheses:

- 1001 1. **Hypothesis A:** assumes that the two time points match, and thus explains data  $D$  with  
1002 a single, representative Gaussian distribution  $N(\mu_*, \sigma_*)$  denoted by  $N_*$  (which is either  
1003  $N_{R(j)}$  or  $N_{Q(i)}$ ).
- 1004 2. **Hypothesis  $\Phi$ :** assumes that the two time points mismatch, and thus explains data  
1005  $D_{R(j)}$  with  $N_{R(j)}$ , and data  $D_{Q(i)}$  with  $N_{Q(i)}$ , independently.

1006 We then compute the two message lengths:  $I(A, D)$  and  $I(\Phi, D)$  according to **Equation 1** in  
1007 the above described MML formulation:

$$1008 \quad I(A, D) = I(A) + I(D|A) - \text{Equation (3)}$$

$$1009 \quad I(\Phi, D) = I(\Phi) + I(D|\Phi) - \text{Equation (4)}$$

1010 where,  $A = [N_*]$  and  $\Phi = [N_{R(j)}, N_{Q(i)}]$ .  $I(A, D)$  is the total message length of encoding  $A$   
1011 and  $D$  jointly, where  $I(A)$  refers to the encoding length of the parameters  $\mu_*, \sigma_*$  of  
1012  $N_*$  distribution.  $I(D|A)$  refers to the encoding length of all data points in  $D$  based on their  
1013 likelihood under  $N(\mu_*, \sigma_*)$ . Accordingly, we can re-write and expand **Equation 3** to:

$$1014 \quad I(A, D) = I(N_*) + I(D|N_*)$$

$$1015 \quad = I(\mu_*, \sigma_*) + I(D|\mu_*, \sigma_*)$$

1016 On the other hand,  $I(\Phi, D)$  is the total message length of encoding  $\Phi$  and  $D$  jointly, where  
1017  $I(\Phi)$  refers to the sum of the independent encoding lengths of parameters  $\mu_{R(j)}, \sigma_{R(j)}$  of  $N_{R(j)}$   
1018 and  $\mu_{Q(i)}, \sigma_{Q(i)}$  of  $N_{Q(i)}$ .  $I(D|\Phi)$  refers to the sum of the independent encoding lengths of

1019 all data points in  $D_{R(j)}$  and all data points in  $D_{Q(i)}$  based on their likelihood under their  
 1020 respective Gaussian distributions:  $N(\mu_{R(j)}, \sigma_{R(j)})$  and  $N(\mu_{Q(i)}, \sigma_{Q(i)})$ . Accordingly, we can  
 1021 re-write and expand **Equation 4** to:

$$1022 \quad I(\Phi, D) = I(N_{R(j)}) + I(N_{Q(i)}) + I(D|N_{R(j)}, N_{Q(i)})$$

$$1023 \quad = I(\mu_{R(j)}, \sigma_{R(j)}) + I(\mu_{Q(i)}, \sigma_{Q(i)}) + I(D_{R(j)}|\mu_{R(j)}, \sigma_{R(j)}) + I(D_{Q(i)}|\mu_{Q(i)}, \sigma_{Q(i)})$$

1024 Note: See the next section for the equations used to compute each term in **Equation 3** and  
 1025 **Equation 4**.

1026  
 1027 Next, we normalize each total message length to compute a per datum message length (i.e.  
 1028 entropy), by dividing them by the total number of datapoints (single-cells) in  $D$ .

$$1029 \quad I(A, D)_{entropy} = \frac{I(A, D)}{|D_{R(j)}| + |D_{Q(i)}|}$$

$$1030 \quad I(\Phi, D)_{entropy} = \frac{I(\Phi, D)}{|D_{R(j)}| + |D_{Q(i)}|}$$

1031 Note: to make the  $I(A, D)_{entropy}$  measure symmetric, we take the average:

$$1032 \quad I(A, D)_{entropy} = \frac{I(N_{R(j), D})_{entropy} + I(N_{Q(i), D})_{entropy}}{2} \text{ nits per datum}$$

1033  
 1034 Afterwards, we compute a compression statistic  $\Delta$ , which is taken as our  $Cost_{match}(i, j)$ :

$$1035 \quad \Delta = I(A, D)_{entropy} - I(\Phi, D)_{entropy}$$

$$1036 \quad Cost_{match}(i, j) = \Delta$$

1037 As in **Equation 2**, this reflects the log odds posterior ratio:

$$1038 \quad I(A, D) - I(\Phi, D) = \log \left[ \frac{Pr(D) \cdot Pr(\Phi|D)}{Pr(D) \cdot Pr(A|D)} \right] = \log \left[ \frac{Pr(\Phi|D)}{Pr(A|D)} \right]$$

1039 When  $R(j)$  and  $Q(i)$  are very dissimilar, the total encoding length under hypothesis A (i.e.  
 1040 the time points match) results in a larger value compared to that of hypothesis  $\Phi$  (i.e. the time  
 1041 points mismatch). Thus,  $Cost_{match}(i, j)$  increases as the distributions deviate from each other  
 1042 (**Extended Data Fig. 1b, Supplementary Fig. 1b,c**).

1043  
 1044 **Computing the total encoding message length for any Gaussian model  $N_*$  and data  $D$  of**  
 1045 **size  $N$**

1046 The above described  $Cost_{match}(i, j)$  distance measure is computed using the standard MML  
 1047 Wallace Freeman approximation<sup>21,54</sup> defined for a Gaussian distribution<sup>22,55,56</sup>. As defined by  
 1048 **Equation 1**, for any dataset  $D$  and a hypothesis  $H$  that describes  $D = [x_1, x_2, \dots, x_N]$  under a  
 1049 Gaussian distribution  $N(\mu, \sigma)$  with parameters  $\vec{\theta} = (\mu, \sigma)$ , the total message length of  
 1050 encoding  $H$  and  $D$  jointly is given by:

$$1051 \quad I(H, D) = I(\vec{\theta}, D) = I(\vec{\theta}) + I(D|\vec{\theta})$$

1052 MML Wallace Freeman approximation expands this to:

$$1053 \quad I(\vec{\theta}, D) = \frac{d}{2} \log(\kappa_d) - \log[h(\vec{\theta})] + \frac{1}{2} \log(\det[Fisher(\vec{\theta})]) + L(\vec{\theta}) + \frac{d}{2}$$

1054 , where  $d$  is the number of free parameters ( $d = 2$  for a Gaussian), and  $\kappa_d$  is the Conway  
 1055 lattice constant<sup>57</sup> ( $\kappa_d$  is  $\frac{5}{36\sqrt{3}}$  for  $d = 2$ ). Here:  $h(\vec{\theta})$  is the prior over the parameters.  $\mu$  is

1056 defined with a uniform prior over a predefined range of length  $R_\mu$ .  $\log(\sigma)$  is defined with a  
1057 uniform prior over a predefined range of length  $R_\sigma$ . Accordingly,

1058 
$$h(\vec{\theta}) = h(\mu) \cdot h(\sigma) = \left(\frac{1}{R_\mu}\right)\left(\frac{1}{\sigma R_\sigma}\right)$$

1059 
$$\Rightarrow I[h(\vec{\theta})] = -\log[h(\vec{\theta})] = \log(\sigma) + \log(R_\mu R_\sigma)$$

1060 We use  $R_\mu=15.0$  and  $R_\sigma=3.0$  as reasonable for log normalized gene expression data.

1061  $L(\vec{\theta})$  is the negative log likelihood:

1062 
$$L(\vec{\theta}) = N \log(\sigma) + \frac{N}{2} \log(2\pi) + \frac{1}{2\sigma^2} \sum_{i=1}^N (x_i - \mu)^2 - \sum_{i=1}^N \log(\epsilon)$$

1063 where,  $\epsilon$  is the precision of measurement for each data point (taken as  $\epsilon=0.001$ ).

1064  $\det[Fisher(\vec{\theta})]$  is the determinant of the expected Fisher matrix (i.e. the matrix of the  
1065 expected second derivatives of the negative log likelihood function). This determinant has the

1066 closed form:  $\frac{2N^2}{\sigma^4}$ .

1067

### 1068 **The cost of alignment state assignment for the reference time point $j$ and query time 1069 point $i$**

1070 The DP scoring scheme also involves computing a cost of assigning a certain alignment state  
1071  $x \in \Omega = [m, w_d, w_i, d, i]$  for the two time points  $j$  and  $i$ . This state assignment cost is  
1072 computed as the amount of Shannon information<sup>54</sup> required to encode state  $x$  given the  
1073 assigned state  $y$  for the preceding time points. As previously said, in information theory,  
1074 Shannon information defines the optimal length of a message that encodes some event  $E$  with  
1075 a probability  $Pr(E)$  as:  $I(E) = -\log_e(Pr(E))$  measured in nits, where  $I$  denotes  
1076 information. Accordingly, the cost of assigning state  $x$  given a previous state  $y$  is:  $I(x|y) =$   
1077  $-\log_e(Pr(x|y))$ . We define a five-state machine (**Extended Data Fig. 1a**) to explain these  
1078 conditional probabilities of state assignments (a.k.a state transitions).

1079

1080 This finite state machine extends the general three-state alignment machine<sup>17,18</sup> which has a  
1081 match (m) state, delete (d) state, and insert (i) state, by adding two new states: compression  
1082 warp ( $w_d$ ) state and expansion warp ( $w_i$ ) state (**Fig. 1b**). The warp states are equivalent to the  
1083 match state but are extensions to accommodate one-to-many and many-to-one matches  
1084 between the two series, respectively. As in the three-state alignment machine<sup>19</sup>, we enforce  
1085 symmetry, while prohibiting an invalid transition from an indel state to a warp state. That is,  
1086 we do not allow  $i \rightarrow w_d$  and  $d \rightarrow w_i$ , as they can be covered by a single m state in the first  
1087 place. On the other hand, we have the choice of allowing  $d \rightarrow w_d$  and  $i \rightarrow w_i$ , as there can be  
1088 a legitimate case of a warp match after an insertion or deletion. Note: all the outgoing  
1089 transitions of each state in this finite state machine add up to a probability of 1. It also treats  
1090  $\langle i$  and  $d \rangle$  and  $\langle w_i$  and  $w_d \rangle$  equivalently. Consequently, there are 23 total number of state  
1091 transitions in this machine, yet there are only three free transition probability  
1092 parameters:  $[Pr(m|m), Pr(i|i), Pr(m|i)]$ , due to the symmetry and characteristics of the  
1093 machine. These probabilities control the expected lengths of a match and a mismatch. In this  
1094 work, we have chosen reasonable values  $[Pr(m|m)=0.99, Pr(i|i)=0.25, Pr(m|i)=0.4]$  based

1095 on manual tuning. However, we note that these parameters can be automatically inferred  
 1096 using an added layer of optimization and time complexity on top of the main DP  
 1097 optimization, which will be an interesting future direction to follow.

1098

1099 Altogether, our G2G DP scoring scheme utilizes the  $Cost_{match}(i, j)$  function, and the above  
 1100 described state assignment costs (i.e. all possible state transition costs evaluated as  $I(x|y)$  for  
 1101 all possible  $y \rightarrow x$  state transitions under the five-state machine), are then used to define the  
 1102 recurrence relations of our DP algorithm.

1103

1104 **Dynamic programming recurrence relations** We formulate the DP problem using five  
 1105 history matrices [ $Hist_m, Hist_{w_d}, Hist_{w_i}, Hist_d, Hist_i$ ], where each matrix corresponds to  
 1106 each alignment state in  $\Omega$ , respectively. Any history matrix,  $Hist_x$  for state  $x \in \Omega$ , has the  
 1107 dimensions  $(|Q| + 1 \times |R| + 1)$ . In other words, the columns correspond to the time points in  
 1108 the reference series  $R$ , while the rows correspond to the time points in the query series  $Q$ .  
 1109 Each cell  $Hist_x(i, j)$  stores the optimal cost of aligning the prefix time series  $R[1..j]$  and  
 1110  $Q[1..i]$  ending in state  $x$ . The DP recurrence relations to compute each matrix cell  $(i, j)$  of  
 1111 each history matrix for  $i > 0, j > 0$  are:

$$\begin{aligned}
 Hist_m(i, j) &= \min \begin{cases} Cost_{match}(i, j) + Hist_m(i-1, j-1) + I(m|m) \\ Cost_{match}(i, j) + Hist_{w_d}(i-1, j-1) + I(m|w_d) \\ Cost_{match}(i, j) + Hist_{w_i}(i-1, j-1) + I(m|w_i) \\ Cost_{match}(i, j) + Hist_d(i-1, j-1) + I(m|d) \\ Cost_{match}(i, j) + Hist_i(i-1, j-1) + I(m|i) \end{cases} \\
 Hist_{w_d}(i, j) &= \min \begin{cases} Cost_{match}(i, j) + Hist_m(i, j-1) + I(w_d|m) \\ Cost_{match}(i, j) + Hist_{w_d}(i, j-1) + I(w_d|w_d) \\ Cost_{match}(i, j) + Hist_{w_i}(i, j-1) + I(w_d|w_i) \\ Cost_{match}(i, j) + Hist_d(i, j-1) + I(w_d|d) \end{cases} \\
 Hist_{w_i}(i, j) &= \min \begin{cases} Cost_{match}(i, j) + Hist_m(i-1, j) + I(w_i|m) \\ Cost_{match}(i, j) + Hist_{w_d}(i-1, j) + I(w_i|w_d) \\ Cost_{match}(i, j) + Hist_{w_i}(i-1, j) + I(w_i|w_i) \\ Cost_{match}(i, j) + Hist_i(i-1, j) + I(w_i|i) \end{cases} \\
 Hist_d(i, j) &= \min \begin{cases} Hist_m(i, j-1) + I(d|m) \\ Hist_{w_d}(i, j-1) + I(d|w_d) \\ Hist_{w_i}(i, j-1) + I(d|w_i) \\ Hist_d(i, j-1) + I(d|d) \\ Hist_i(i, j-1) + I(d|i) \end{cases} \\
 Hist_i(i, j) &= \min \begin{cases} Hist_m(i-1, j) + I(i|m) \\ Hist_{w_d}(i-1, j) + I(i|w_d) \\ Hist_{w_i}(i-1, j) + I(i|w_i) \\ Hist_d(i-1, j) + I(i|d) \\ Hist_i(i-1, j) + I(i|i) \end{cases}
 \end{aligned}$$

1112

1113

1114 As previously described,  $Cost_{match}(i, j)$  measures the distance between the two interpolated  
 1115 gene expression distributions corresponding to the reference time point  $j$  and query time point  
 1116  $i$ . The cost term  $I(x|y) \forall x, y \in \Omega$  refers to the Shannon information of a state transition  $y \rightarrow$   
 1117  $x$  (e.g.  $I(i|m)$  is the cost of  $m \rightarrow i$ , computed as  $-\log_e[Pr(i|m)]$ ), based on the five-state

1118 alignment machine as explained before. Prior to computing the above relations, the history  
1119 matrices are initialized as:

$$\text{Hist}_x(i, j)_{x \in \{m, w_d, w_i\}} = \begin{cases} 0 & \text{for } i > 0, j > 0 \\ \infty & \text{otherwise} \end{cases}$$

$$\text{Hist}_i(i, j) = \text{Hist}_i(i - 1, 0) + I(i|i)$$

$$\text{Hist}_d(i, j) = \text{Hist}_d(0, j - 1) + I(d|d)$$

1120

1121 Note: For the cases of  $\langle i = 1 \text{ and } j = 1 \rangle$  (i.e. before the first state transition), we assign a  
1122 uniform transition cost:  $I(m) = I(i) = I(d) = -\log_e(1/3)$ . All the five history matrices are  
1123 computed by running the aforementioned DP algorithm. We then generate the optimal  
1124 alignment  $Y^*$  as a five-state string by backtracking, starting from the cell:

$$\min \begin{cases} \text{Hist}_m(|Q|, |R|) \\ \text{Hist}_{w_d}(|Q|, |R|) \\ \text{Hist}_{w_i}(|Q|, |R|) \\ \text{Hist}_d(|Q|, |R|) \\ \text{Hist}_i(|Q|, |R|) \end{cases}$$

1125

1126 Note: The optimal alignment cost landscape matrix  $L$  can be visualized by constructing:

1127

$$L(i, j) = \min_{x \in \Omega} \{ \text{Hist}_x(i, j) \}$$

1128

1129  $Y^*$  is the optimal alignment between  $R$  and  $Q$  time series that minimizes the total DP  
1130 alignment cost under our DP scoring scheme and recurrence relations. In other words,  
1131  $Y^*$  describes the optimal set of reference time point and query time point pairs that are  
1132 matched, as well as the optimal set of reference time points and query time points that are  
1133 mismatched. The  $k$ th character in  $Y^*$ , i.e.,  $Y^*[k]$ , gives the alignment state for the  
1134 corresponding reference and query time points ( $Y^*[k] \in \Omega = \{m, w_d, w_i, i, d\}$ ). Let the set of  
1135 matched time point pairs  $(i, j)$  in  $Y^*$  be denoted by  $T_{matched}$ . Then, the total alignment cost of  
1136  $Y^*$  is the sum of the total match cost ( $C_{match}$ ) and the total state assignment cost ( $C_{state}$ ),  
1137 where:

1138

$$C_{match}(Y^*) = \sum_{\forall (i, j) \in T_{matched}} \text{Cost}_{match}(i, j)$$

1139

$$C_{state}(Y^*) = \sum_{k=1}^{|Y^*|} I(Y^*[k]|Y^*[k-1])$$

1140 under our scoring scheme.

1141 Overall, the optimal alignment  $Y^*$  is generated by optimizing the following objective  
1142 function:

1143

$$Y^* = \text{argmin}_{\forall Y \in \mathbf{Y}} \{ C_{match}(Y) + C_{state}(Y) \}$$

1144 where  $\mathbf{Y}$  is the space of all possible five-state alignment hypotheses.

1145

1146 **Note on using a custom  $\text{Cost}_{match}(i, j)$  function:** Our MML-based  $\text{Cost}_{match}(i, j)$  function  
1147 defines a distribution-based distance measure to compute the cost of matching the reference  
1148 time point  $j$  and query time point  $i$  based on their gene expression distributions (as explained



1149 in the previous sections). Considering expression distributions rather than just the mean  
1150 expression values allows us to make technical/batch variations implicit. However, we note  
1151 that this can be any cost function (e.g. KL-divergence) which can measure the distance  
1152 between two Gaussian distributions. However, our MML-based compression statistic  $\Delta$   
1153 enables us to define a complete description of each hypothesis, which considers both model-  
1154 complexity and data-fit. On the other hand, KL-divergence is equivalent to the expected log-  
1155 likelihood ratio, which does not take the complexity of model parameters into account.

1156

## 1157 **Reporting alignment statistics over gene-level alignments**

1158

1159 G2G generates individual alignments for all genes of interest by running the DP alignment  
1160 algorithm (detailed in the previous section) independently for each gene between the  
1161 reference and query. Each optimal alignment output is a five-state alignment string describing  
1162 the matches and mismatches. These gene-level alignments are further analyzed to generate  
1163 useful statistics and insights as below.

1164

1165 ***Distribution of Alignment similarities*** The percentage of total matching (i.e. one-to-one  
1166 matches and warps) (termed as ‘alignment similarity’ percentage) in each five-state gene-  
1167 alignment string, as well as its average across all genes, provide quantitative measures of the  
1168 degree of concordance between the reference and query. We also generate a single aggregate  
1169 alignment across all genes using each of their optimal alignment landscapes. Recall that any  
1170 matrix cell  $(i, j)$  in the optimal alignment landscape (i.e.  $L(i, j) = \min_{x \in \Omega} \{Hist_x(i, j)\}$ )  
1171 refers to the optimal ending alignment state of the prefix time series  $R_{1..j}$  and  $Q_{1..i}$ . Thus,  
1172 across such matrices of all genes, there is a five-state frequency distribution for each  $(i, j)$ . To  
1173 generate an average alignment, we start a traversal from the right-most bottom cell  $(|Q| +$   
1174  $1, |R| + 1)$ , and choose the most probable alignment state  $x \in \Omega$  for  $R_{|R|}$  and  $Q_{|Q|}$  time points  
1175 as the most frequent state across all genes. According to this state, we traverse to the next  
1176 matrix cell (i.e. if it is  $m$ , we go to  $(i - 1, j - 1)$ ; if it is  $d$ , we go to  $(i, j - 1)$  and so on). By  
1177 the time we reach the cell  $(0, 0)$ , we have a representative five-state alignment string.

1178

1179 ***Clustering five-state alignment strings*** Given a set of five-state alignment strings (i.e. gene-  
1180 specific alignments), we employ a string clustering approach to identify groups of genes that  
1181 show similar temporal matching and mismatching patterns. This requires the definition of a  
1182 distance measure between two alignment paths. While the polygonal area based distance  
1183 measure<sup>58</sup> is ideal for three-state alignment strings, it is unable to distinguish between warps  
1184 and indels. Thus, we use a binary encoding scheme that transforms each five-state alignment  
1185 string into a binary vector of size  $|R| + |Q|$ . This is done by traversing through the alignment  
1186 path, recording for each trajectory, the match/mismatch state of their respective pseudotime  
1187 points (i.e. a match state  $x \in [m, w_d, w_i]$  is encoded by 1; a mismatch state  $x \in [i, d]$  is  
1188 encoded by 0). The resultant binary strings of  $R$  and  $Q$  are then concatenated to numerically  
1189 represent their alignment path. Next, the binary representation of each gene-specific  
1190 alignment is used to compute a pairwise Hamming distance matrix between all pairs of  
1191 alignments, which is then input to standard agglomerative hierarchical clustering (under the

1192 average linkage method; using the Python *sklearn.cluster* package). The threshold parameter  
1193 for linkage distance controls the level at which the cluster merge stops, allowing inspection of  
1194 the clusters at different levels of a clustering hierarchy.

1195

1196 **Pathway overrepresentation analysis** The alignment similarity percentage of each gene-  
1197 specific alignment allows us to rank all the genes, from which we select the top  $k$   
1198 mismatching genes to analyze their pathway overrepresentation. The identified clusters of  
1199 genes are also analyzed. We use the GSEapy Enrichr<sup>58-60</sup> wrapper against the  
1200 *MSigDB\_Hallmark\_2020*<sup>61</sup> and *KEGG\_2021\_Human* pathway genesets<sup>61,62</sup>. For all analyses,  
1201 a 0.05 significance threshold of the adjusted P-value (with the default FDR correction method  
1202 used by GSEapy) was applied.

1203

## 1204 **Datasets**

1205

### 1206 **Datasets for simulated experiments**

1207

#### 1208 **Simulating pairwise datasets with different alignment patterns using Gaussian** 1209 **Processes**

1210 We modeled log-normalized expression of a gene  $x$  as a function  $f$  of time  $t$  using a  
1211 Gaussian Process (GP), a stochastic process where any finite instantiation of it follows a  
1212 multivariate Gaussian distribution. In other words, it is a distribution of functions, from  
1213 which we can sample an  $f(t)$ :

$$1214 f(t) \sim GP(\vec{\mu}(t), K(t, t'))$$

1215

1216 where,  $\mu$  is the mean vector, and  $K(t, t')$  is a kernel function which evaluates a covariance  
1217 matrix covering every pair of finite time points where the  $f(t)$  is evaluated. The  
1218 characteristics of this function are controlled by the class of the kernel being used (e.g. a  
1219 Radial Basis Function (RBF) kernel for generating smooth, non branching functions; a  
1220 change point kernel for generating branching functions). Therefore, a GP with an appropriate  
1221 kernel is ideal to simulate different trajectory patterns in single-cell gene expression across  
1222 pseudotime. Following the standard textbook and kernels discussed in literature<sup>24,25</sup>, we  
1223 implemented a simulator for three different types of pairwise trajectory patterns: (1)  
1224 *Matching*, (2) *Divergence*, and (3) *Convergence*, across a pseudotime range  $[0,1]$  with 300  
1225 total number of simulated cells for each trajectory.

1226

1227 **Generating a Matching pair of reference and query gene trajectories** We used a GP with  
1228 a constant  $c$  mean vector  $\vec{\mu}_c$  ( $c \in [0.5,9.0]$  uniform random sampled) and RBF kernel  $K$   
1229 to first sample a function  $\mu(t)$  that describes an average expression value for each time point.  
1230 Next, we sampled two gene expression trajectories:  $GEX_{ref}(t)$  and  $GEX_{query}(t)$ , from a GP  
1231 where the mean is  $\mu(t)$  and the covariance matrix is  $\sigma^2 I$  ( $\sigma \in [0.05,1.0]$  uniform random  
1232 sampled, and  $I$ = identity matrix).

1233

$$1234 \begin{aligned} \mu(t) &\sim N(\vec{\mu}_c, K) \\ GEX_{ref}(t) &\sim N(\mu(t), \sigma^2 I) \end{aligned}$$

1235  $GEX_{query}(t) \sim N(\mu(t), \sigma^2 I)$

1236

1237 **Generating a Divergence pair of reference and query gene trajectories** Here we use a  
 1238 Change Point (CP) kernel which imposes a bifurcation in the trajectory as it reaches an  
 1239 approximate time point  $t_{CP}$  (a.k.a. change point). The idea is to activate one covariance  
 1240 function before  $t_{CP}$  and another covariance function after  $t_{CP}$ . We used the below CP  
 1241 kernel<sup>24,25</sup>  $K_{CP}$ :

1242 
$$K_{CP}(t, t') = aK_1(t, t') + a'K_2(t, t')$$

1243 where,

1244 
$$a = \sigma(t)\sigma(t')$$

1245 
$$a' = [1 - \sigma(t)][1 - \sigma(t')]$$

1246 
$$\sigma(x) = \frac{1}{1 + \exp(-s(x - t_{CP}))}$$
 (sigmoid function)

1247 with  $s$  acting as a steepness parameter, deciding how steep the change point is. Penfold et al  
 1248 (2018)<sup>24</sup> defines a branching process by enforcing a zero kernel ( $K_1$ ) imposed before  $t_{CP}$  and  
 1249 another suitable kernel ( $K_2$ ) afterwards. We used an RBF for  $K_2$ . Following is the generative  
 1250 process starting with a base mean function  $\mu(t)$  sampled from a separate GP with a constant  
 1251  $c$  mean vector  $\vec{\mu}_c$  ( $c \in [0.5, 9.0]$  uniform randomly sampled), and an RBF kernel  $K$ .

1252 
$$\mu(t) \sim N(\vec{\mu}_c, K)$$

1253 
$$f_1(t) \sim N(\mu(t), K_{CP})$$

1254 
$$f_2(t) \sim N(\mu(t), K_{CP})$$

1255 
$$GEX_{ref}(t) \sim N(f_1(t), \sigma^2 I)$$

1256 
$$GEX_{query}(t) \sim N(f_2(t), \sigma^2 I)$$

1257

1258 Next, two functions were sampled from a GP with base  $\mu(t)$  and  $CP(t, t')$ , which were then  
 1259 used as mean vectors to generate  $GEX_{ref}(t)$  and  $GEX_{query}(t)$  with covariance matrix  $\sigma^2 I$   
 1260 ( $\sigma=0.3$ ). This was run for [ $t_{CP}=0.25, t_{CP}=0.5, t_{CP}=0.75$ ] to obtain 3 different groups of  
 1261 Divergence with varying bifurcation points. We use a constant  $\sigma$  which is not too low and not  
 1262 too high, and also apply a filtering criteria to ensure that the final dataset includes pairs of  
 1263 simple and clear divergence (a stable ground truth with no complex patterns). Pairs are  
 1264 filtered through basic heuristics such as the difference between mean expression before  
 1265 divergence and at the end terminals of reference and query.

1266

1267 **Extended Data Fig. 2** shows that the branching effect may start approximately before the  
 1268 change point. Therefore, we expect the early non-divergent segment to continue at least until  
 1269 time point  $i < t_{CP}$  where we begin to see  $> 0.01$  covariance in the change point kernel.

1270 Accordingly, given our approx\_bifurcation\_start\_point =  $i$ , we expect the range of match  
 1271 lengths to fall between a lower limit =  $n\_total\_pseudotime\_points \times i$

1272 and upper limit =  $n\_total\_pseudotime\_points \times change\_point$ .

1273 Equivalently, we expect mismatch lengths to fall between  $n\_total\_pseudotime\_points \times$   
 1274  $(1 - i)$

1275 and upper limit =  $n\_total\_pseudotime\_points \times (1 - change\_point)$ .

1276

1277 **Generating a *Convergence* pair of reference and query gene trajectories** For  
1278 *Convergence*, we simply inverted the above generated divergent trajectory pairs, as the  
1279 *Convergence* and *Divergence* patterns are complementary to each other.

1280

### 1281 **Simulating mismatches on real scRNA-seq data**

1282 We downloaded the mouse pancreas development dataset<sup>26</sup> from the CellRank python  
1283 package<sup>63</sup>. We subset the dataset to include only cells in the beta-cell lineage, using the  
1284 annotations from the original authors (selecting cells labeled as “Ngn3 low EP”, “Ngn3 high  
1285 EP”, “Fev+”, “Beta”), retaining 1845 cells. To select genes varying along beta-cell  
1286 differentiation, we ran the CellRank pipeline (v1.5.1) to compute lineage drivers, following  
1287 the package tutorials  
1288 ([https://cellrank.readthedocs.io/en/stable/auto\\_examples/estimators/compute\\_lineage\\_drivers.html](https://cellrank.readthedocs.io/en/stable/auto_examples/estimators/compute_lineage_drivers.html)) and selected genes  
1289 significantly associated with differentiation potential to beta-cells (at 1% FDR we selected  
1290 769/2000 highly variable genes). For the pseudotime axis, we used the diffusion pseudotime  
1291 estimated by the CellRank authors. To simulate trajectories for alignment, we divided the  
1292 diffusion pseudotime (between 0 and 1) equally into 50 bins, assigned cells to the bins based  
1293 on their estimated pseudotime and randomly split cells into query and reference datasets in  
1294 each bin. To simulate deletions of  $n$  bins, we excluded query cells from the first  $n$  pseudotime  
1295 bins (i.e. cells where the pseudotime value was less or equal to the upper margin of the  $n$ th  
1296 bin). To simulate mismatches of  $n$  bins, we found the pseudotime bin with highest mean  
1297 expression for the gene of interest in the query cells, and calculated mean ( $max\_mean$ ) and  
1298 standard deviation ( $max\_std$ ) of expression of query cells for this bin; then, for each of the  
1299 first  $n$  pseudotime bins, we substitute expression values of the query cells with a sample from  
1300 a normal distribution with mean =  $max\_mean + max\_std$  and standard deviation =  $max\_std$  .  
1301 Pseudotime values for the query cells were min-max normalized to [0,1] after perturbation.  
1302 We then ran the G2G alignment on each tested gene and calculated their alignment similarity  
1303 (match calling) percentages.

1304

### 1305 **Datasets for benchmarking G2G**

1306

#### 1307 **Dendritic cell stimulation dataset**

1308 The normalized single-cell expression datasets of PAM/LPS stimulation and their pseudotime  
1309 estimates were downloaded from the CellAlign<sup>5</sup> github repository and converted into  
1310 *Anndata* objects. These contain two gene sets: ‘core antiviral module’ (99 genes) and ‘peaked  
1311 inflammatory module’ (89 genes), pre-selected from the original publication<sup>23</sup> and referred to  
1312 as global and local modules, respectively by Alpert et al (2018)<sup>5</sup>. The datasets include 179  
1313 PAM-stimulated cells and 290 LPS-stimulated cells for which the pseudotime has been  
1314 estimated by CellAlign authors using Diffusion-maps.

1315

#### 1316 **Simulated dataset containing trajectories with no shared process**

1317 This is a simulated, negative control dataset which was generated using the published script  
1318 by Laidlaw et al (2023) (in the TrAGEDY<sup>11</sup> Git repository). Their script uses DynGen<sup>64</sup>, a  
1319 single-cell data simulator for dynamic processes. The resulting negative dataset contains two

1320 trajectories simulated under two different gene regulatory networks and TF activity, ensuring  
1321 that there is no shared process between them. The reference and query trajectories have 619  
1322 genes across 2000 and 1940 cells, respectively.

1323

1324 We reproduced the high-dimensional alignments from CellAlign and TrAGEDy over the 619  
1325 genes in this dataset by re-running the scripts provided by Laidlaw et al (2023). Here,  
1326 CellAlign uses Euclidean distance, whereas TrAGEDy uses Spearman correlation. Note: For  
1327 gene-level alignment, TrAGEDy was run using the Euclidean distance as in CellAlign; this is  
1328 because Spearman correlation is mathematically undefined for a single gene dimension. We  
1329 input log normalized, scaled gene expression data to CellAlign, following its documentation.

1330

### 1331 **Dataset preparation for *in vivo in vitro* T cell development comparison**

1332

#### 1333 **Cell cultures for artificial thymic organoid (ATO) and single-cell RNA sequencing 1334 experiment**

1335 MS5 line transduced with human DLL4 was obtained from G. Crooks (UCLA) as a gift. The  
1336 MS5-hDLL4 cells were cultured in DMEM (Gibco) with 10% FBS. Two iPSC lines were  
1337 used in this study. Cell lines HPSI0114i-kolf\_2 (Kolf) and HPSI0514i-fiaj\_1 (Fiaj) were  
1338 obtained from the Human Induced Pluripotent Stem Cell initiative (HipSci: [www.hipsci.org](http://www.hipsci.org))  
1339 collection. All iPSC lines were cultured on vitronectin (diluted 1:25 in PBS; Gibco) coated  
1340 plates, in TeSR-E8 media (Stemcell Technologies).

1341

1342 We followed the PSC-ATO protocol as previously described<sup>31</sup>. iPSC cells were harvested as  
1343 a single-cell suspension and seeded ( $3 \times 10^6$  cells per well) in GFR reduced Matrigel (Corning)  
1344 - coated 6-well plates in X-VIVO 15 media (Lonza), supplemented with rhActivin A,  
1345 rhBMP4, rhVEGF, rhFGF (all from R&D Systems), and ROCK inhibitor (Y27632; LKT  
1346 Labs) on day -17, and only rhBMP4, rhVEGF and rhFGF on days -16 and -15. Cells were  
1347 harvested 3.5 days later (day-14), and isolated by FACS for CD326<sup>-</sup>CD56<sup>+</sup> (PE anti-human  
1348 CD326 antibody, Biolegend, 324205; APC anti-human CD56 antibody, Biolegend, 318309)  
1349 human embryonic mesodermal progenitors (hEMPs).

1350

1351 Isolated hEMPs were combined with MS5-hDLL4 at a ratio of 1:50. Two or three cell-dense  
1352 droplets ( $5 \times 10^5$  cells in 6  $\mu$ l hematopoietic induction medium) were deposited on top of an  
1353 insert in each well of a six-well plate. Hematopoietic induction medium composed of EGM2  
1354 (Lonza) supplemented with ROCK inhibitor and SB blocker (TGF- $\beta$  receptor kinase inhibitor  
1355 SB- 431542; Abcam) was added into the wells outside the inserts so that the cells sat at the  
1356 air-liquid interface. The organoids were then cultured in EGM2 with SB blocker for 7 days  
1357 (days -14 to -7), before the addition of cytokines rhSCF, rhFLT3L, rhTPO (all from  
1358 Peprotech) between days -6 to 0. These 2 weeks formed the hematopoietic induction phase.  
1359 On day 1, media was changed again to RB27 (RPMI supplemented with B27 (Gibco),  
1360 ascorbic acid (Sigma-Aldrich), penicillin/streptomycin (Sigma-Aldrich) and glutamax  
1361 (Thermo Fisher Scientific)) with rhSCF, rhFLT3L and rhIL7. The organoids can be  
1362 maintained in culture for 7 more weeks in this medium.

1363

1364 For dissociation of organoids on day -7, they were removed from culture insert and  
1365 incubated in digestion buffer, which consisted of collagenase type IV solution (StemCell  
1366 Technologies) supplemented with 0.88mg/ml collagenase/dispase (Roche) and 50U DNase I  
1367 (Sigma), for 20 minutes at 37°C. Vigorous pipetting was performed in the middle of the  
1368 incubation and at the end. After complete disaggregation, single cell suspension was prepared  
1369 by passing through a 50-µm strainer.

1370

1371 For dissociation of organoids from day 0 onwards, a cell scraper was used to detach ATOs  
1372 from cell culture insert membranes and detached ATOs were then submerged in cold flow  
1373 buffer (PBS (Gibco) containing 2% (v/v) fetal bovine serum (FBS; Gibco) and 2 mM EDTA  
1374 (Invitrogen)). Culture inserts were washed and detached ATOs were pipetted up and down to  
1375 form single-cell suspension before passing through a 50-µm strainer.

1376

1377 Cells were then stained with designed panels of antibodies and analyzed by flow cytometry.  
1378 FACS was performed at the same time and live human DAPI<sup>-</sup> anti-mouse CD29<sup>-</sup> (APC/Cy7  
1379 anti-mouse CD29 antibody, Biolegend, 102225) cells were sorted for day -7, day 0 and week  
1380 3 samples, and live (DAPI<sup>-</sup>) cells were sorted for week 5 and week 7 samples before loading  
1381 onto each channel of the Chromium chip from Chromium single cell V(D)J kit (10X  
1382 Genomics). The metadata for all the ATO samples can be found in **Supplementary Table**  
1383 **50**. For the day -14 sample, some sorted (both hEMP and the rest of DAPI<sup>-</sup> fraction) and  
1384 unsorted cells were stained with hashtag antibodies (TotalSeq-C antibodies from Biolegend,  
1385 see **Supplementary Table 51**, following 10X cell surface protein labeling protocol) before  
1386 being mixed together with some mouse stromal cells (MS5-hDLL4) for 10X loading. For  
1387 week 1 sample, hashtag antibodies were added in at the same time as the FACS antibodies  
1388 i.e., before sorting.

1389

1390 Single-cell cDNA synthesis, amplification and gene expression (GEX) and cell surface  
1391 protein (CITE-seq) libraries were generated following the manufacturer's instructions.  
1392 Sequencing was performed on the Illumina Novaseq 6000 system. The gene expression  
1393 libraries were sequenced at a target depth of 50,000 reads per cell using the following  
1394 parameters: Read1: 26 cycles, i7: 8 cycles, i5: 0 cycles; Read2: 91 cycles to generate 75-bp  
1395 paired-end reads.

1396

### 1397 **ATO data preprocessing and annotation**

1398 Raw scRNA-seq reads were mapped with cellranger 3.0.2 with combined human reference of  
1399 GRCh38.93 and mouse reference of mm10-3.1.0. Low quality cells were filtered out  
1400 (minimum number of reads = 2000, minimum number of genes = 500, maximum number of  
1401 genes = 7000, Scrublet<sup>65</sup> (v0.2.3) doublet detection score < 0.15, mitochondrial reads fraction  
1402 < 0.2). Cells where the percentage of counts from human genes was < 90% were considered  
1403 as mouse cells and excluded from downstream analysis. Cells were assigned to different cell  
1404 lines (Kolf, Fiaj) using genotype prediction with Souporecell (v2.4.0)<sup>66</sup>. The mapping outputs  
1405 of the eight samples were merged, with the sample ID prepended to the barcode IDs in both  
1406 the BAM and barcodes.tsv to prevent erroneous cross-sample barcode overlap. Souporecell

1407 was run with `--skip_remap True --K 2` and the common variants file based on common  
1408 ( $\geq 2\%$  population allele frequency) SNPs from 1000 genomes data, as distributed in the  
1409 tool's repository. We selected 2 clusters due to the already known 2 cell lines. Next the data  
1410 went through the standard pipeline of filtering out genes (cell cycle<sup>67</sup> genes, genes detected in  
1411 less than 3 cells), and normalizing the per cell total count to 10,000 followed by log<sub>1p</sub>  
1412 transformation and scaling to zero mean and unit variance (with `max_value = 10` to clip after  
1413 scaling), using SCANPY<sup>68</sup>. The final dataset had 31,483 ATO cells with 23,526 genes which  
1414 were input to CellTypist<sup>6</sup> (for prediction using pre-trained logistic regression classifier –  
1415 *Pan\_Fetal\_Human* model under majority voting). We then obtained a Uniform Manifold  
1416 Approximation and Projection (UMAP) embedding for this dataset based on its scVI<sup>33</sup> batch  
1417 corrected embedding (v0.14.5 with 10 latent dimensions (default), 2 hidden layers, 128 nodes  
1418 per hidden layer (default), and 0.2 dropout rate for the neural network), and subsetted cells to  
1419 non-hematopoietic lineage, T/ILC/NK lineage, and other hematopoietic lineage cells  
1420 (**Extended data Fig. 8**) using their Leiden clustering. By default, scVI models gene counts  
1421 with zero-inflated negative binomial distribution, defines a normal latent distribution, and  
1422 handles batch effects. For each lineage, scVI latent dimensions and UMAP embedding were  
1423 re-computed and cell types were annotated by inspecting both the CellTypist results and  
1424 marker gene expression.

1425

#### 1426 **Joint Embedding of reference and organoid in preparation for pseudotime estimation**

1427 We downloaded the annotated human fetal atlas dataset from  
1428 <https://developmental.cellatlas.io/fetal-immune> and extracted the cell types (79,535 cells in  
1429 total) representing the T cell developmental trajectory starting from progenitor cells towards  
1430 Type 1 Innate T cells (T1 dataset), including Cycling MPP, HSC\_MPP, LMPP\_MLP,  
1431 DN(early) T, DN(P) T, DN(Q) T, DP(P) T, DP(Q) T, ABT(entry) and Type 1 innate T cells.  
1432 We then compiled a reduced representation (20,384 cells) that preserve their underlying cell  
1433 type composition. This was done by random subsampling from each cell type (with minimum  
1434 sample size = 500 cells, aiming ~20,000 total number of cells) based on their originally  
1435 published annotations. Such stratified-sampling approach is practical for dealing with  
1436 massive single-cell datasets to reduce computational resource requirements. Separately, we  
1437 extracted the cell types from the ATO dataset (19,013 cells) representing the trajectory  
1438 starting from iPSCs towards SP T cells, including iPSC, primitive streak, mesodermal  
1439 progenitor, endothelium, HSC\_MPP, HSC\_MPP/LMPP\_MLP/DC2, DN(early) T, DN T,  
1440 DP(P) T, DP(Q) T, ABT(entry), SP T cells.

1441

1442 Then the T1 and ATO datasets were merged and preprocessed together by filtering out cells  
1443 with more than 8% total mitochondrial UMI, cell cycle genes<sup>67</sup> and genes expressed in less  
1444 than 3 cells (`min_cells = 3`). Next, the highly variable genes were selected after per cell  
1445 count normalization to 10,000 reads per cell and log<sub>1p</sub> normalization. The T1 pan fetal  
1446 reference had 33 batches (due to different 10X chemistry 3' *versus* 5' and different donors),  
1447 while the ATO had only 2 batches (due to 2 cell lines, Kolf and Fiaj). This merged dataset  
1448 was then input to constructing a joint latent embedding using the scVI (v0.14.5) variational  
1449 autoencoder implementation<sup>33</sup> (with 10 latent dimensions (default), 2 hidden layers, 128  
1450 nodes per hidden layer (default) and 0.2 dropout rate for the neural network). The joint

1451 embedding was then taken to build the cell neighborhood graph and UMAP embedding using  
1452 SCANPY<sup>68</sup>. The final T1 and ATO datasets comprise 20,327 cells and 17,176 cells  
1453 respectively. 18,436 cells of T1 and 10,089 cells of ATO belong to T cell lineage, i.e., DN T  
1454 onwards.

1455  
1456 We followed a similar preprocessing for the pan fetal reference representing the trajectory  
1457 towards CD8+T (CD8 dataset) (including Cycling MPP, HSC\_MPP, LMPP\_MLP, DN(early)  
1458 T, DN(P) T, DN(Q) T, DP(P) T, DP(Q) T, ABT(entry) and CD8+T cells). The initially  
1459 extracted CD8 subset (83,177 cells) was reduced to 20,412 cells, which was then merged  
1460 with the 19,013 ATO cells and subjected to the same filtering and normalization as for the  
1461 T1+ATO merge prior to scVI integration. The final CD8 dataset comprises 20,324 cells of  
1462 which, 18,490 cells are DN T onwards.

1463

### 1464 **Pseudotime estimation using the Gaussian Process Latent Variable Model**

1465 The differentiation pseudotime was estimated separately for T1 reference, CD8 reference and  
1466 ATO by employing the Gaussian Process Latent Variable Model (GPLVM)<sup>34,37</sup>. GPLVM is a  
1467 probabilistic non-linear dimensionality reduction method which models observed gene  
1468 expression as a function  $f(X)$  of a set of latent covariates  $X$ . It enables us to incorporate  
1469 Gaussian time priors when estimating pseudotime as a latent dimension. We used the Pyro<sup>69</sup>  
1470 GPLVM implementation (Pyro v1.8.0) with Sparse Gaussian Process inference (32 inducing  
1471 points) and Radial Basis Function kernel to obtain a 2D latent embedding, where the first  
1472 latent dimension corresponds to pseudotime and the second latent dimension corresponds to a  
1473 second level of latent effects (e.g. batch). The first dimension was assigned a Gaussian prior  
1474 with cell capture times as the mean. The second latent dimension was zero initialized to allow  
1475 for a second level of latent effects (e.g. batch). The model used Adam optimizer to infer the  
1476 optimal latent embedding with 2000 iterations (where the loss curve reasonably converged).

1477

1478 For the ATO, the GPLVM was initialized with cell capture days as the prior. Since there was  
1479 no temporal data present in the pan fetal reference, we first approximated time prior for each  
1480 reference cell as the weighted average of their k-nearest organoid neighborhood (kNN)  
1481 capture time. A k=3 organoid neighborhood for a reference cell was obtained using the  
1482 cKDTree based search method implemented in BBKNN<sup>70</sup> on their scVI based UMAP  
1483 embedding. Contribution of each organoid neighbor was weighted according to its distance.  
1484 (kNN distance vector was softmax transformed, and the normalized reciprocal of each  
1485 distance was taken as the associated weight, enforcing less contribution from distant  
1486 neighbors towards the weighted average). This approximation may introduce outliers due to  
1487 the spatial arrangement of different cell types in the UMAP. Thus, we leveraged the known  
1488 cell-type annotations to refine the approximation by assigning each reference cell with the  
1489 average approximated capture time of its cell type. These approximated capture times were  
1490 scaled to be in [0,1] range and input as the mean prior to the previously described GPLVM.  
1491 For T1 and CD8 GPLVMs, the input gene space was 2608 genes and 2616 genes respectively  
1492 (same as at scVI integration). To ensure no outliers, the GPLVM estimated pseudotime was  
1493 further refined by correcting outliers of each cell type using the cell-type specific average of  
1494 estimated pseudotime. Outliers were selected based on the Interquartile Range (IQR) rule (i.e.



1495 1.5 times IQR below the first quartile and above the third quartile of the cell-type specific  
1496 pseudotime distribution).

1497

### 1498 **Genes2Genes alignment**

1499 For the complete T1 vs ATO comparison using G2G, the total common gene space of 20,240  
1500 genes was considered upon filtering genes with less than 3 cells expressed, 10,000 total count  
1501 per cell normalization, and log1p normalization. For the DN T onwards comparison, there  
1502 were 17,718 genes for T1 vs. ATO, and 20,183 genes for CD8 vs. ATO. All pseudotime  
1503 estimates were min-max normalized to ensure [0,1] range. These total gene spaces were  
1504 subsetted to include only the transcription factors<sup>40</sup> (1371 TFs) and relevant signaling  
1505 pathways focused in this work. G2G alignment was performed using 15 equispaced  
1506 pseudotime points.

1507

### 1508 **Software packages used in the work**

1509 Genes2Genes framework and all analysis related code (including plot generation) were  
1510 implemented using the standard Python libraries (Numpy, Pandas, Seaborn, scikit-learn),  
1511 GPyTorch, GSEapy. Illustrations were made using Adobe Illustrator 2023 and BioRender.

### 1512 **Code and data availability**

1513 **Genes2Genes** is implemented as an open-source package in Python 3 (v3.8) with tutorial  
1514 available at: <https://github.com/Teichlab/Genes2Genes>. Code and data used to generate  
1515 figures and perform analyses in the manuscript are available at:  
1516 [https://github.com/Teichlab/G2G\\_notebooks](https://github.com/Teichlab/G2G_notebooks) and  
1517 [https://drive.google.com/drive/folders/15LKmo3yRB-](https://drive.google.com/drive/folders/15LKmo3yRB-cR8Aq3aE59Taq2r0KtJSdX?usp=sharing)  
1518 [cR8Aq3aE59Taq2r0KtJSdX?usp=sharing](https://drive.google.com/drive/folders/15LKmo3yRB-cR8Aq3aE59Taq2r0KtJSdX?usp=sharing). Raw sequencing data for newly generated  
1519 sequencing libraries have been deposited in ArrayExpress (accession number E-MTAB-  
1520 12720).

## 1521 **Acknowledgements**

1522 We thank the Crooks lab (A. Montel-Hagen, S. Lopez, and G. Crooks from University of  
1523 California, Los Angeles) for their kind help in setting up the ATO experiments; N Huang, K  
1524 Meyer, AM Cujba, L Dratva, R Lindeboom, R Elmentaite, A Maartens from the Wellcome  
1525 Sanger Institute, CH Ek from University of Cambridge, Z Miao from Guangzhou Laboratory,  
1526 Y Chen and T Wang from London School of Economics and Political Science for their  
1527 helpful discussions; and BioRender.com for graphical illustrations. We gratefully  
1528 acknowledge the Sanger Flow Cytometry Facility and Sanger Core Sequencing pipeline for  
1529 support with sample processing and sequencing library preparation. We acknowledge  
1530 Wellcome Sanger Institute as the source of HPSI0114i-kolf\_2 and HPSI0514i-fiaj\_1 human  
1531 induced pluripotent cell lines which were generated under the Human Induced Pluripotent  
1532 Stem Cell Initiative funded by a grant from the Wellcome Trust and Medical Research  
1533 Council, supported by the Wellcome Trust (WT098051) and the NIHR/Wellcome Trust  
1534 Clinical Research Facility, and acknowledge Life Science Technologies Corporation as the  
1535 provider of Cytotune. This publication is part of the Human Cell Atlas -  
1536 [www.humancellatlas.org/publications](http://www.humancellatlas.org/publications).

## 1537 **Funding**

1538 D.S. is supported by the Marie Curie Individual Fellowship; This project has received  
1539 funding from the European Union's Horizon 2020 research and innovation programme under  
1540 the Marie Skłodowska-Curie grant agreement No: 101026506. C.S. is supported by a  
1541 Wellcome Trust Ph.D. Fellowship for Clinicians. S.A.T. is funded by Wellcome  
1542 (WT206194), the ERC Consolidator Grant ThDEFINE (646794). This work was also  
1543 supported by a grant from the Wellcome Sanger Institute's Translation Committee Fund.

## 1544 **Author contributions**

1545 D.S., C.S. and S.A.T. conceived the initial project. D.S. and C.S. set up and directed the  
1546 study. D.S., C.S., E.D. and K.P. performed bioinformatic analyses. D.S. designed and  
1547 developed the software. C.S. A.S.S. and J.P. performed cell culture experiments. D.M., E.D.,  
1548 B.D. and S.A.T. provided intellectual input. S.A.T. acquired funding. D.S. and C.S. wrote the  
1549 manuscript. All authors read and/or edited the manuscript.

## 1550 **Competing interests**

1551 In the past three years, S.A.T. has received remuneration for Scientific Advisory Board  
1552 Membership from Sanofi, GlaxoSmithKline, Foresite Labs and Qiagen. S.A.T. is a co-  
1553 founder and holds equity in Transition Bio.

## 1554 Extended Data Figures

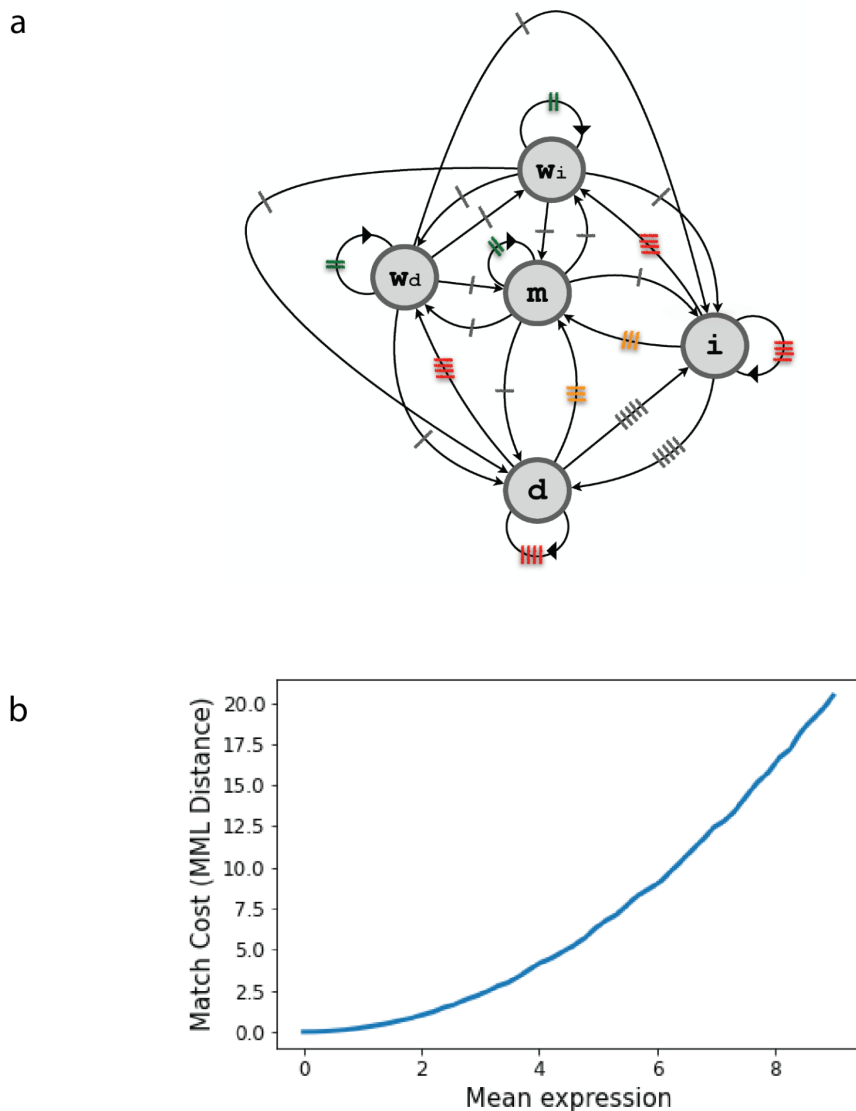

1555  
1556 **Extended Data Fig. 1 | The dynamic programming algorithm in G2G relies on a five-**  
1557 **state machine and a Bayesian information-theoretic match cost function. a,** This is a  
1558 (five-state) finite state machine which can generate a string over the alphabet,  $\Omega = [m, w_d, w_i,$   
1559  $d, i]$  that describes all the 5 possible states of alignment (**Fig. 1b**) between two time points.  
1560 Each arrow represents a state transition. Arrows with the same color tag implies equal  
1561 probability of state transition. **b,** Behavior of the minimum message length (MML) inference  
1562 based match cost function used by G2G. It plots the MML distance (i.e. match cost) between  
1563 the standard Gaussian distribution  $N(0,1)$  and  $N(\mu, 1)$  Gaussian distribution for  $\mu \in [0,9]$  at  
1564 50 equispaced points. 5000 data points have been randomly sampled from each  $N(\mu, 1)$   
1565 distribution to represent itself. More illustrative examples are shown in **Supplementary Fig.**  
1566 **1b,c.**

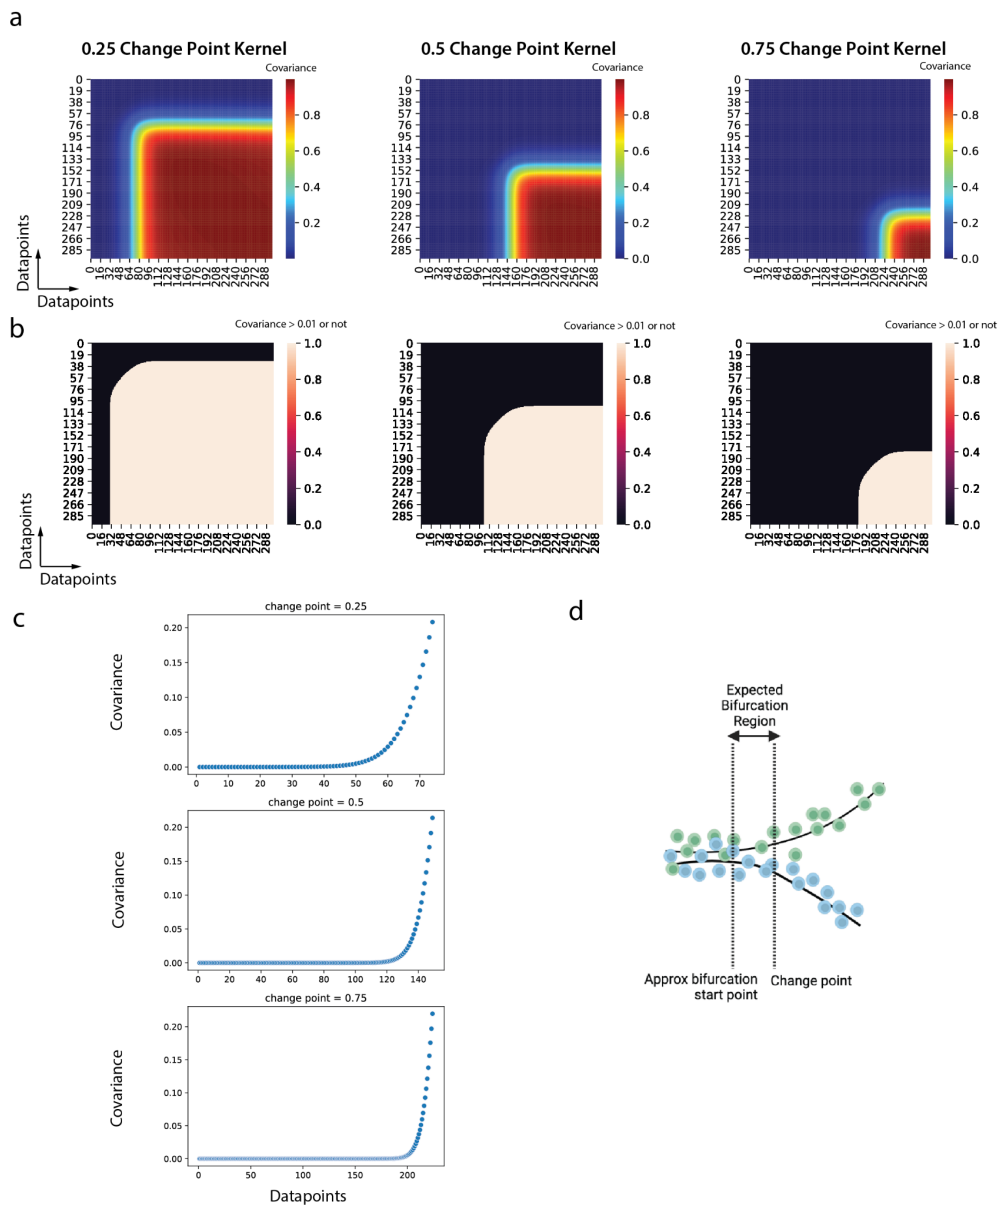

1567

1568

1569

1570

1571

1572

1573

1574

1575

1576

**Extended Data Fig. 2 | Simulating the bifurcation of reference and query trajectories**

**using change point kernels. a**, Change point kernel heatmaps for each approximate bifurcation point (change point)  $\in [0.25, 0.5, 0.75]$ . **b**, The same change point kernels binarized based on the 0.01 covariance threshold (top), **c**, The average covariance plotted for each  $i \times i$  sub square matrix from  $i = 0$  to  $i =$  change point, showing that the branching effect can approximately start before the specified change point. **d**, Expected bifurcation region is taken from the point where we begin to see  $> 0.01$  covariance in the change point kernel, until the particular change point.

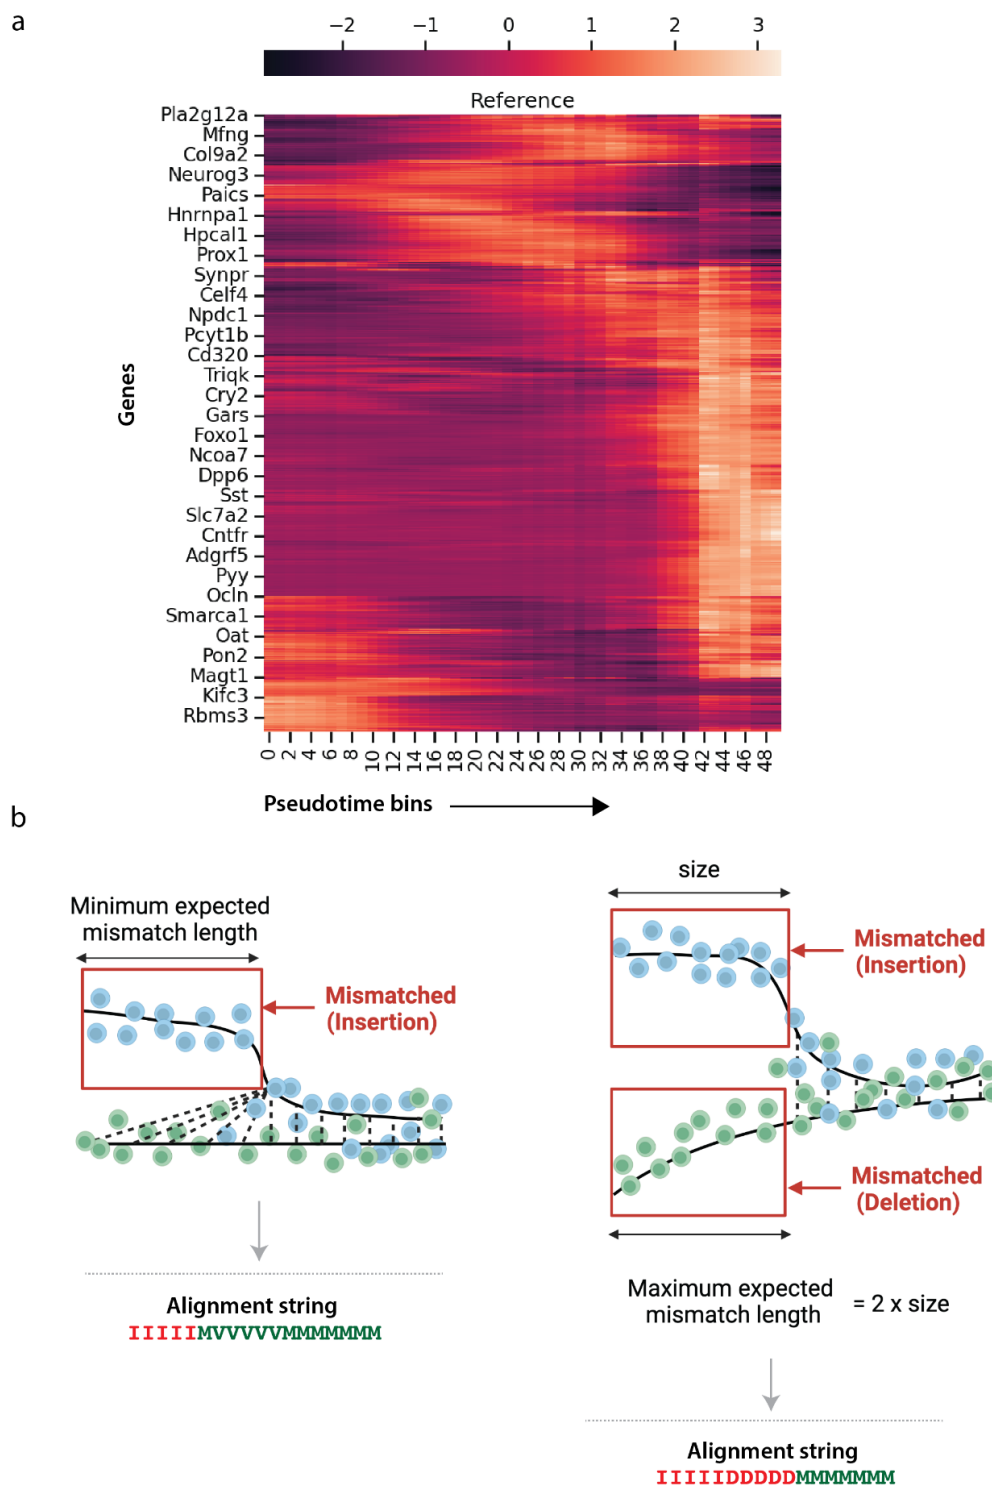

1577  
1578

1579 **Extended Data Fig. 3 | Simulation Experiment 2: simulating perturbations across 769**  
 1580 **genes in the scRNA-seq dataset of E15.5 murine pancreatic development<sup>26</sup>.** **a**, Overall  
 1581 smoothed (interpolated) and z-normalized mean gene expression along the pseudotime  
 1582 (equally divided into 50 bins) for all genes in the dataset. **b**, Example illustrations of the two  
 1583 types of trajectory alignment that gives the minimum expected mismatch length and the  
 1584 maximum expected mismatch under the perturbation scenario 2 (**Fig. 3f,g**), where a start  
 1585 portion of a particular size in the query trajectory (in blue) is changed with respect to the  
 1586 reference trajectory (in green).



1592 their alignment cost landscapes with the optimal alignment path highlighted by the black  
1593 dashed line (right). **b**, Example simulated convergent pairs for approximate bifurcation point  
1594  $\in [0.25, 0.5, 0.75]$  (left) and their alignment cost landscapes with the optimal alignment path  
1595 highlighted by the black dashed line. (right). **c**, Example simulated matching pair (left) and its  
1596 alignment cost landscape with the optimal alignment path highlighted by the black dashed  
1597 line. **d**, Mean percentage of alignment similarity observed in the 7 classes of alignment  
1598 pattern. **e**, On the pairwise total time-point match count matrix between reference and query  
1599 trajectories, the main average alignment path across all the 1500 alignments (left), and the  
1600 individual, cluster-specific average alignment paths for the 7 representative clusters that  
1601 accurately capture the 7 classes of pattern (right). Note: the color codes for the paths follow  
1602 the same in **d**. **f**, The five-state alignment strings of the 7 cluster-specific average alignments  
1603 with their alignment similarity percentages.

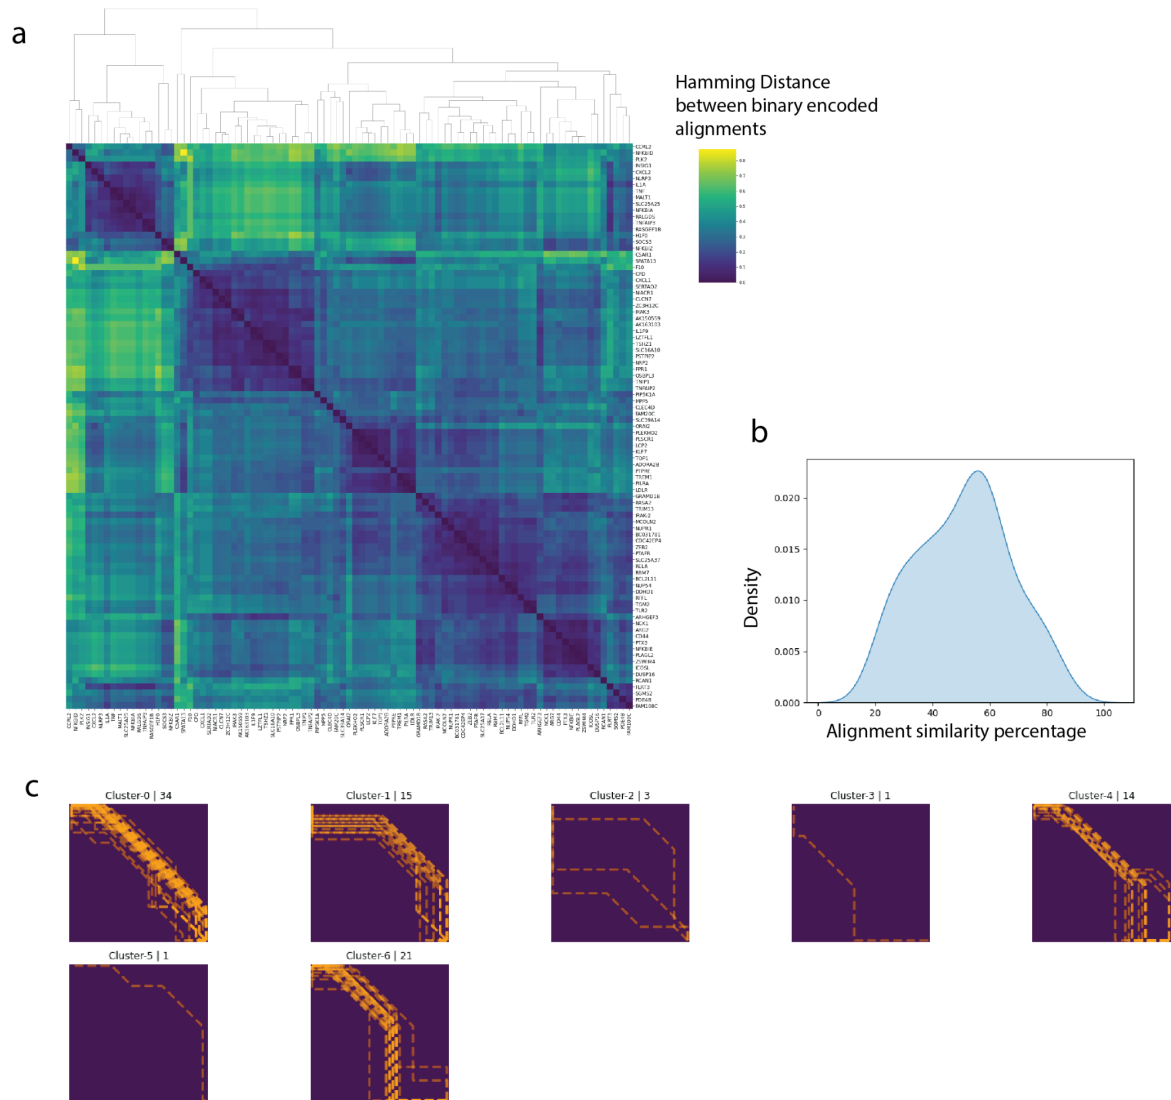

1604

1605 **Extended Data Fig. 5 | The PAM vs. LPS ‘peaked inflammatory module’ alignment**

1606 **clustering outputs. a,** The clustermap of the pairwise Hamming distance matrix of all 89

1607 gene alignments. **b,** Density plot of the alignment similarity distribution (i.e. distribution of

1608 the percentage of matches/warps across all the alignment outputs). **c,** Seven gene alignment

1609 clusters were identified from hierarchical agglomerative clustering at a 0.3 distant threshold.

1610 Each plot titled by “Cluster-x | n” is the pairwise matrix of reference and query time points,

1611 visualizing alignment paths for all the genes (one alignment per gene and a total of n genes in

1612 the cluster) in cluster x. *C5AR1* (Cluster-3) and *RCAN1* (Cluster-5) stand out as single-gene

1613 clusters.



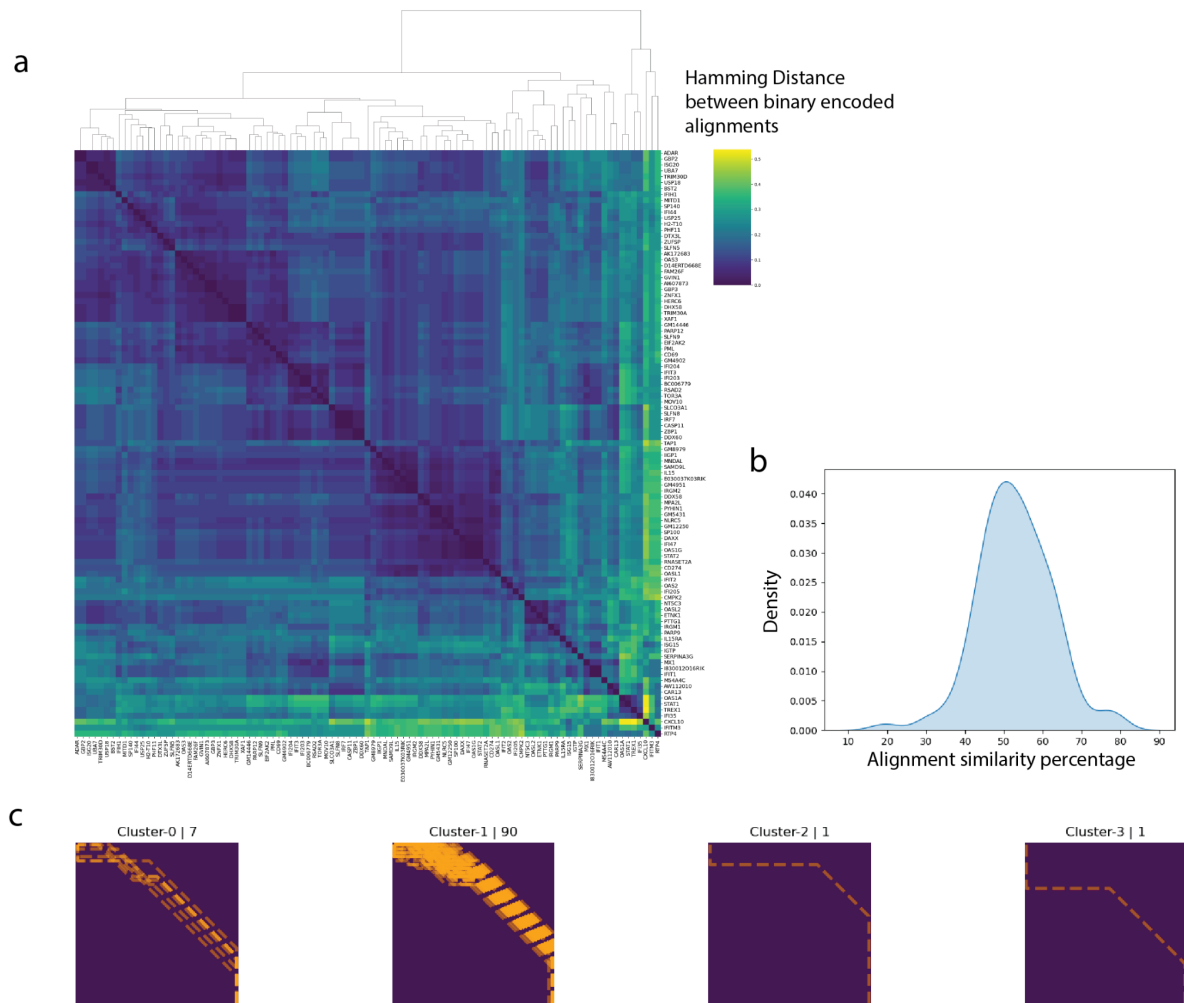

1614

1615

1616 **Extended Data Fig. 6 | The PAM vs. LPS ‘core antiviral module’ alignment clustering**

1617 **outputs. a**, The clustermap of the pairwise Hamming distance matrix of all 99 gene

1618 alignments. **b**, Density plot of the alignment similarity distribution (i.e. distribution of the

1619 percentage of matches/warps across all the alignment outputs). **c**, Four gene alignment

1620 clusters were identified from hierarchical agglomerative clustering at a 0.25 distant threshold.

1621 Each plot titled by “Cluster-x | n” is the pairwise matrix of reference and query time points,

1622 visualizing alignment paths for all the genes (one alignment per gene and a total of n genes in

1623 the cluster). *CXCL10* (Cluster-2) and *IFITM3* (Cluster-3) stand out as single-

1624 gene clusters.

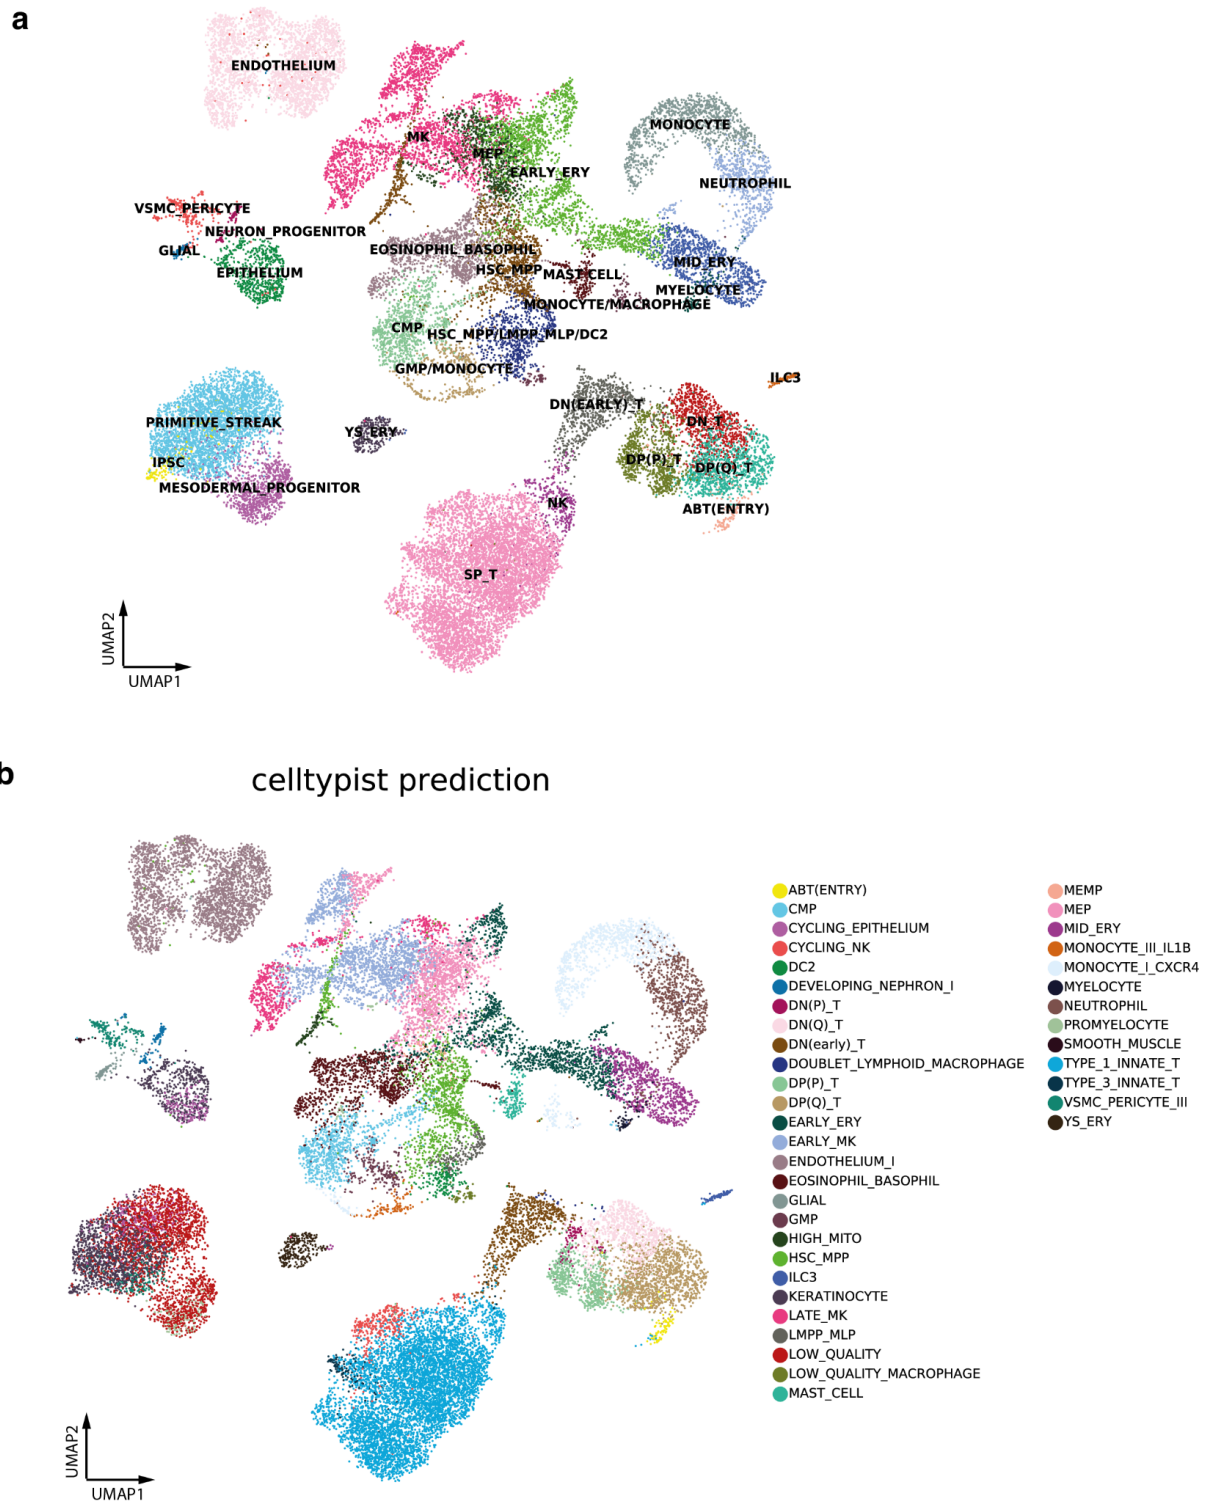

1625  
1626

1627 **Extended Data Fig. 7 | Analysis of artificial thymic organoid scRNA-seq data. a**, UMAP  
1628 visualization of different cell types in the ATO (refined annotation). iPSC: induced  
1629 pluripotent stem cell, HSC\_MPP: hematopoietic stem cell, and multipotent progenitor,  
1630 LMPP\_MLP: lymphoid-primed multipotent progenitor and multi lymphoid progenitor, DC:  
1631 dendritic cell, CMP: common myeloid progenitor, GMP: granulocyte and monocyte  
1632 progenitor, MK: megakaryocyte, MEP: megakaryocyte erythroid progenitor, YS\_ERY: yolk  
1633 sac-like erythrocyte, EARLY\_ERY: early erythrocyte, MID\_ERY: mid-stage erythrocyte,

1634 DN(EARLY) T: early double negative T cell, DN T: double negative T cell, DP(P) T:  
1635 proliferating double positive T cell, DP(Q) T: quiescent double positive T cell, SP T: single  
1636 positive T cell, NK: natural killer cell, ILC: innate lymphoid cell. **b**, Predicted annotations  
1637 from logistic regression model with CellTypist using the developing human immune atlas<sup>30</sup>  
1638 as the training dataset, overlaid on the same UMAP plot as in **a**.

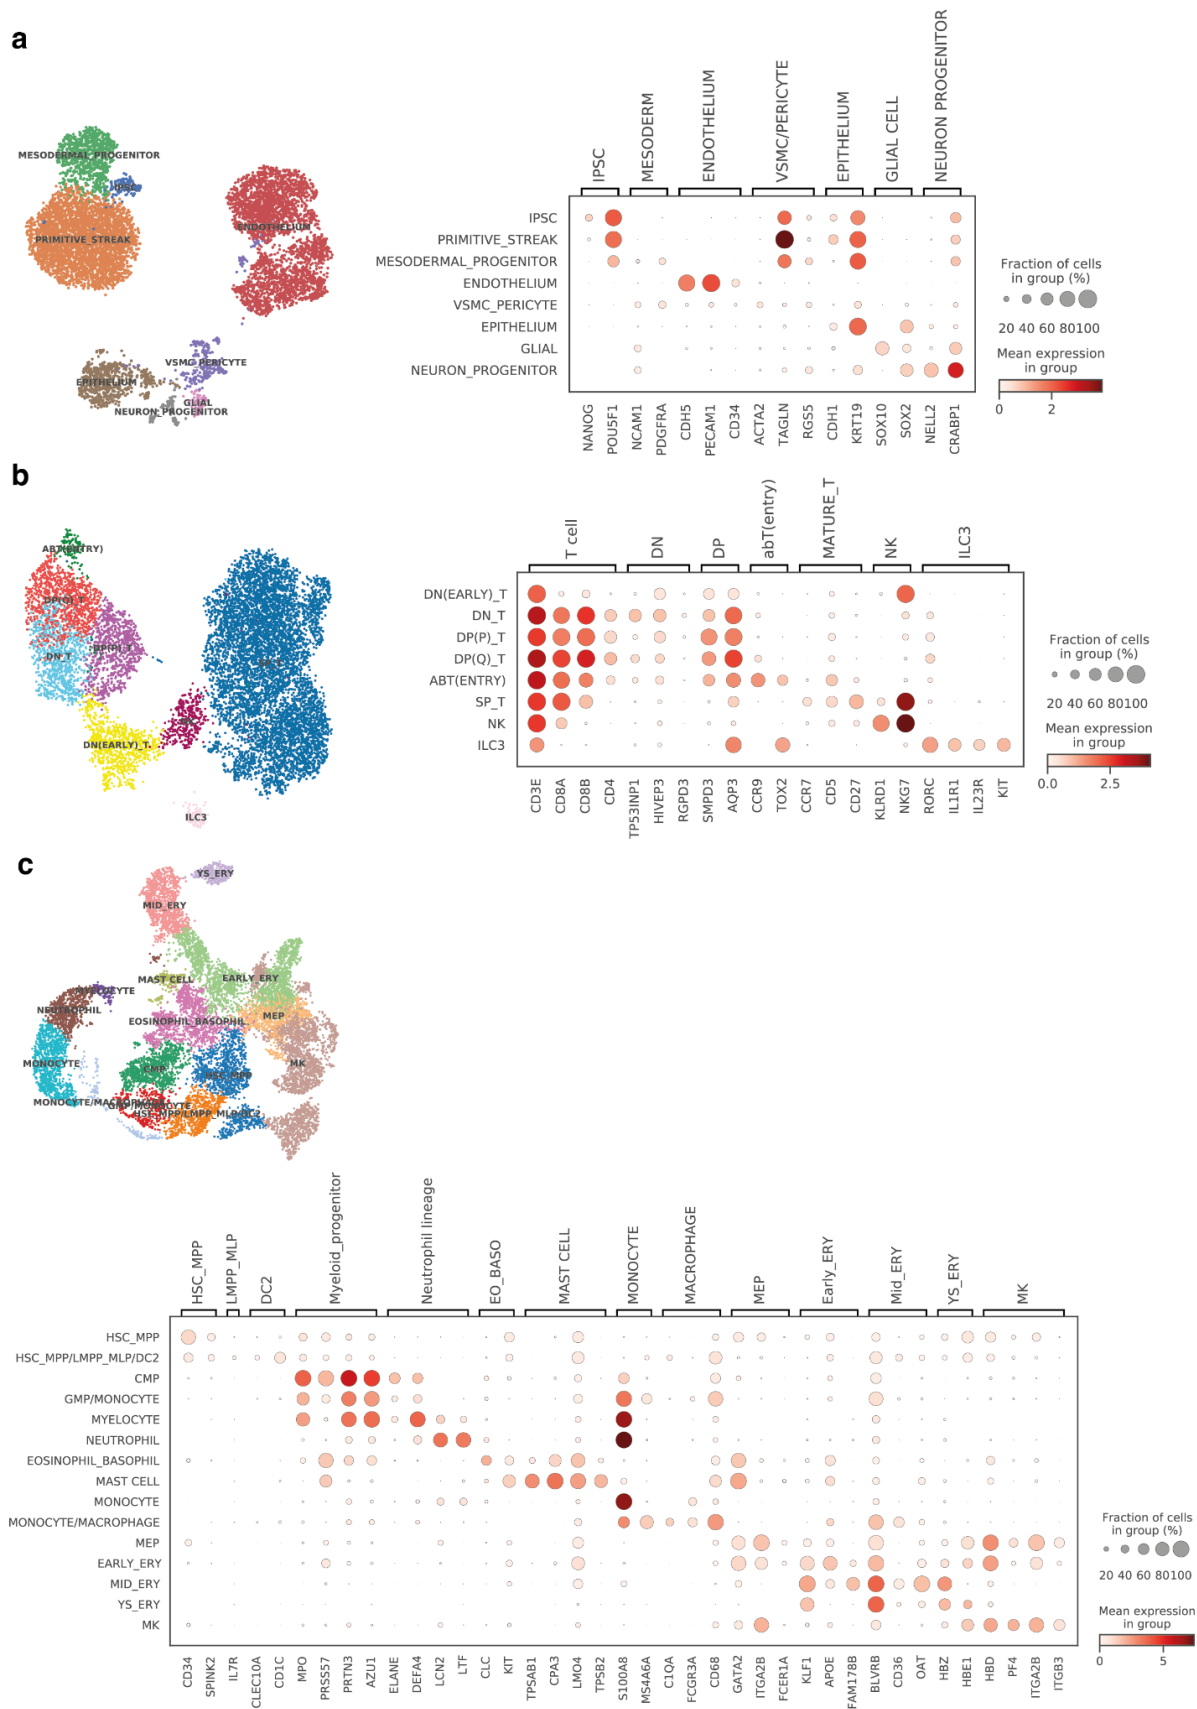

1640 **Extended Data Fig. 8 | Annotation of artificial thymic organoid scRNA-seq data.** For  
1641 each subset lineage embedding generated through scVI, we show UMAP embeddings of cells  
1642 colored by annotated cell populations and dot plots of mean expression (log-normalized  
1643 counts, dot color) and fraction of expressing cells (dot size) of marker genes (columns) used  
1644 for cell population annotation (rows). **a**, Annotation of non-hematopoietic cells. **b**,  
1645 Annotation of T/ILC/NK lineage cells. **c**, Annotation of other hematopoietic cells that are not  
1646 in **b**.

1647

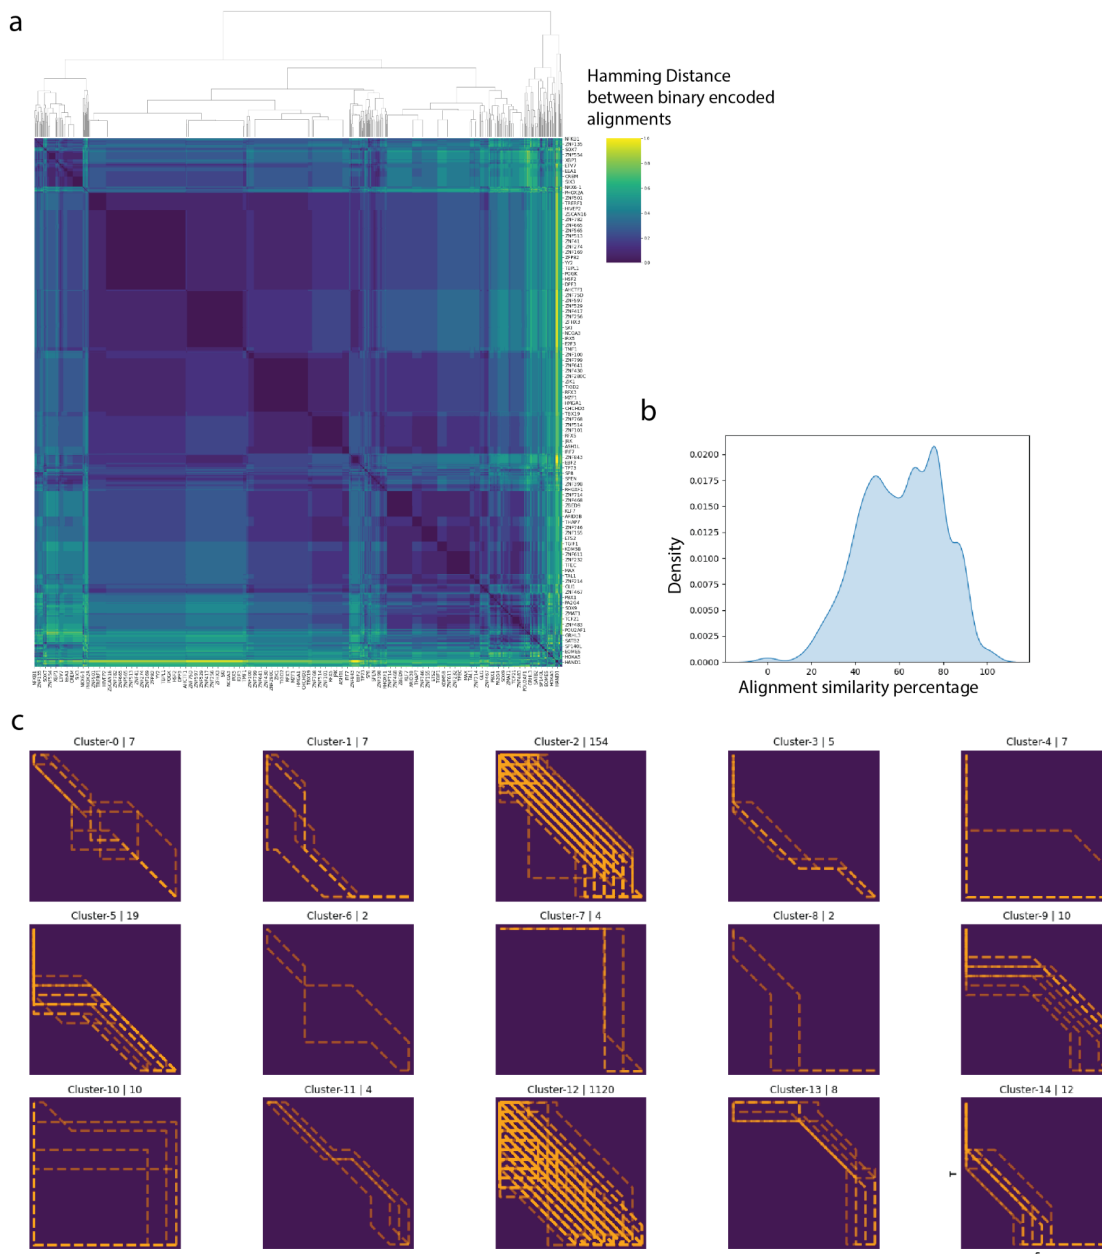

1648

1649

1650 **Extended Data Fig. 9 | Pan fetal reference vs artificial thymic organoid alignment**

1651 **clustering outputs.** **a**, The clustermap of the pairwise Hamming distance matrix of all 1371

1652 transcription factor alignments. **b**, Density plot of the alignment similarity distribution (i.e.

1653 distribution of the percentage of matches/warps across all the alignment outputs). **c**, Fifteen

1654 gene alignment clusters were identified from hierarchical agglomerative clustering at a 0.3

1655 distant threshold. Each plot titled by “Cluster-x | n” is the pairwise matrix of reference and

1656 query time points, visualizing alignment paths for all the genes (one alignment per gene and a

1657 total of n genes in the cluster) in a cluster x.

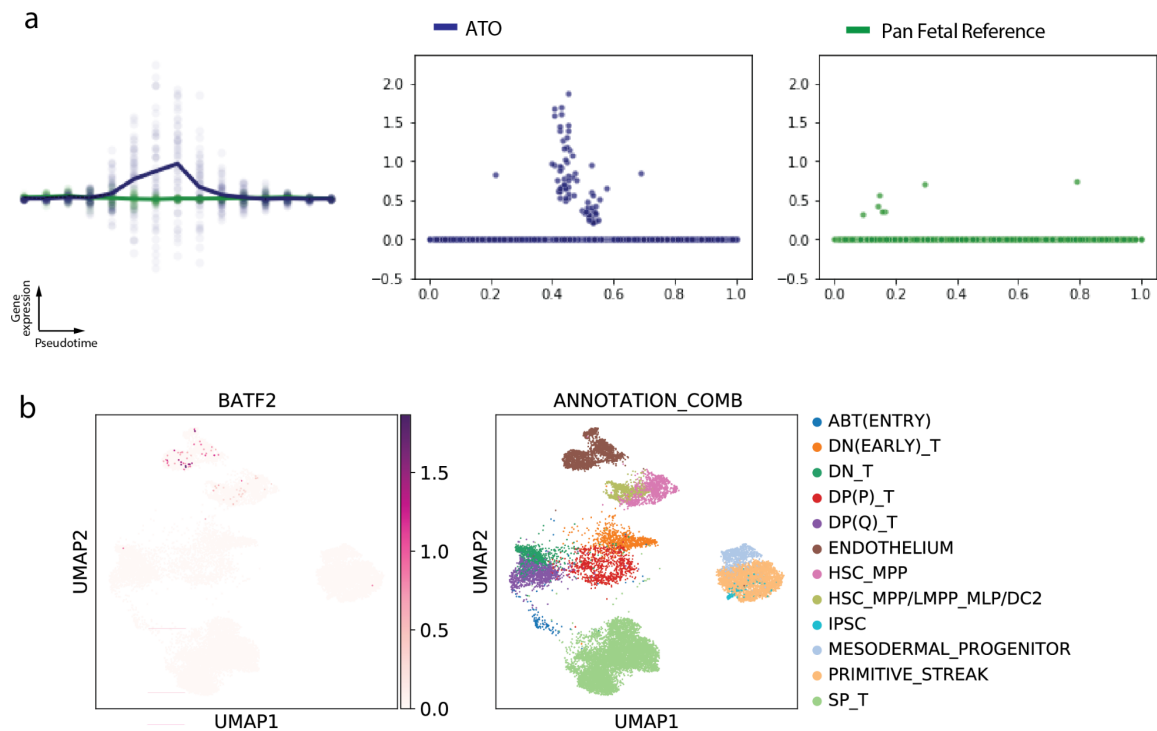

1658

1659

1660

1661

1662

1663

1664

1665

**Extended Data Fig. 10 | *BATF2* expression in *in vitro* ATO and *in vivo* pan fetal**

**reference. a**, Left panel: the interpolated log<sub>1p</sub> normalized expression (*y*-axis) against pseudotime (*x*-axis) for *BATF2*. Right two panels: the actual log<sub>1p</sub> normalized expression (*y*-axis) against pseudotime (*x*-axis). Each point represents a cell. **b**, The same UMAP visualization as in **Fig. 5e**, subsetted to *in vitro* cells from ATO, colored by the *BATF2* gene expression value (left) or the cell types (right).

Type1 Innate T Reference vs. ATO for DN onwards

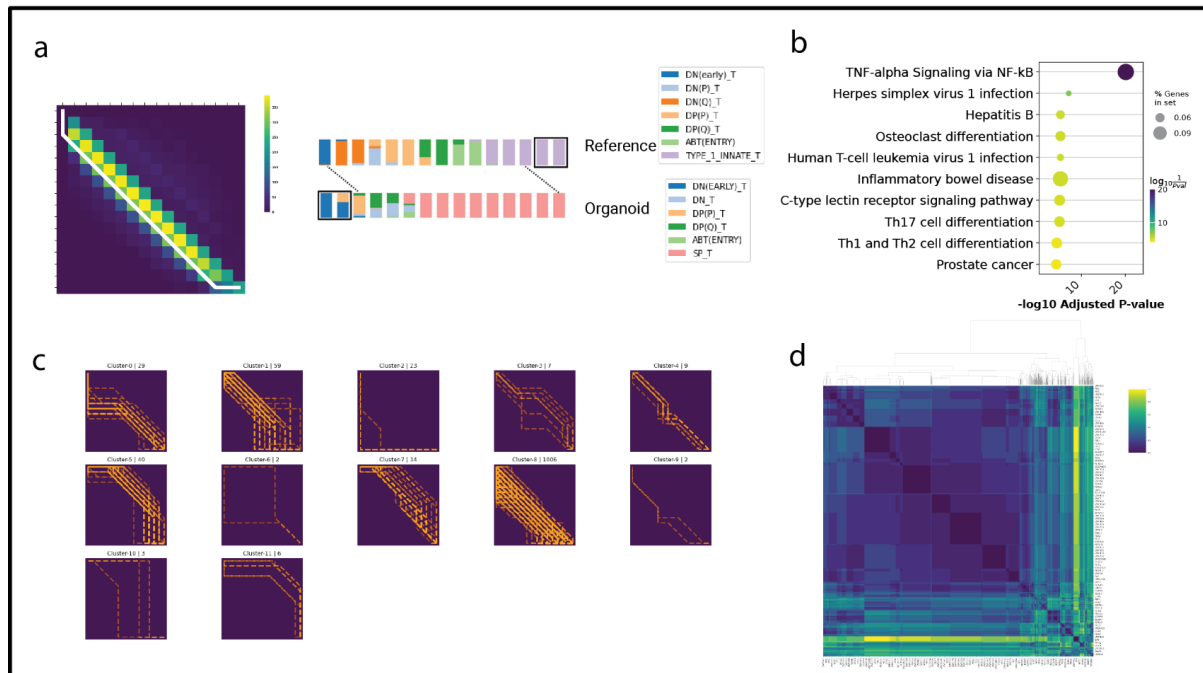

CD8 Reference vs. ATO for DN onwards

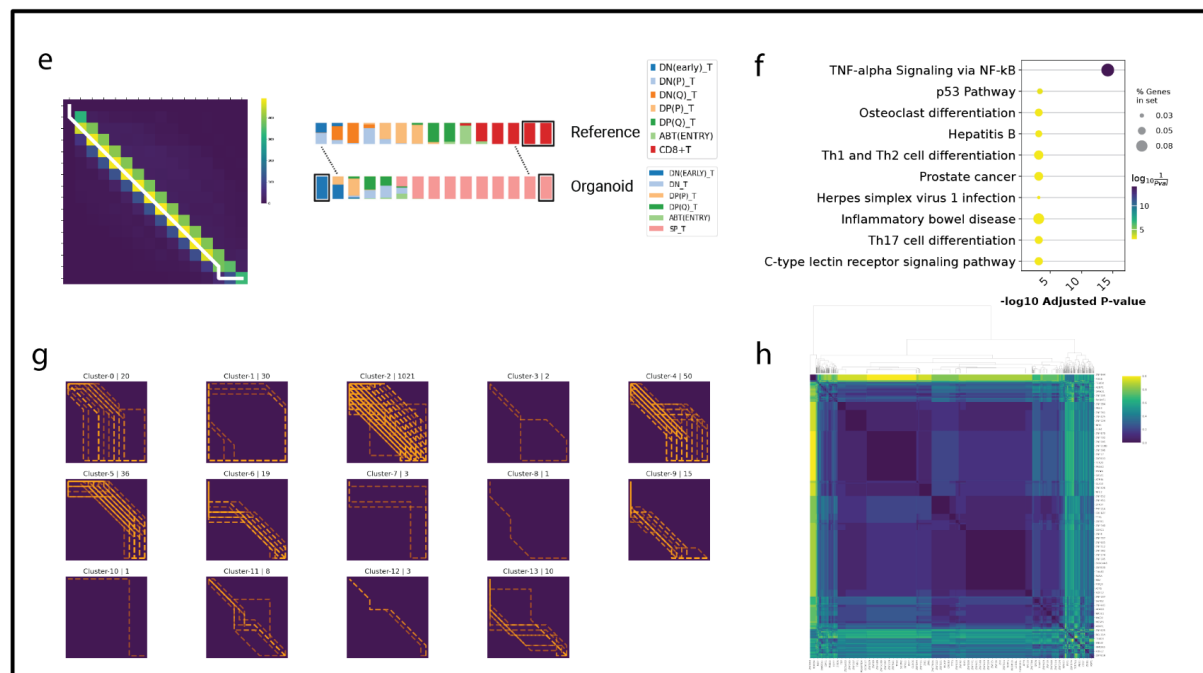

1666  
1667

1668 **Extended Data Fig. 11 | Analysis of the pan fetal reference vs artificial thymic organoid**  
 1669 **(ATO) alignment from DN T cells onwards.** **a**, Aggregate alignment between Type 1  
 1670 Innate T cell reference and ATO across 1220 human transcription factors. **b**, Gene set  
 1671 overrepresentation results of the most mismatched genes from alignment in **a**. **c**, Twelve gene  
 1672 alignment clusters were identified for **a** from hierarchical agglomerative clustering at a 0.3  
 1673 distant threshold. Each plot titled by “Cluster-x | n” is the pairwise matrix of reference and  
 1674 query time points, visualizing alignment paths for all the genes (one alignment per gene and a  
 1675 total of n genes in the cluster) in a cluster x. **d**, The clustermap of the pairwise Hamming



1676 distance matrix of all TF alignments in **a**. **e**, Aggregate alignment between CD8+ Reference  
1677 and ATO across 1219 human transcription factors. **f**, Gene set overrepresentation results of  
1678 the most mismatched genes from alignment in **e**. **g**, Fourteen gene alignment clusters were  
1679 identified for **e** from hierarchical agglomerative clustering at a 0.3 distant threshold. Each  
1680 plot titled by “Cluster-x | n” is the pairwise matrix of reference and query time points,  
1681 visualizing alignment paths for all the genes (one alignment per gene and a total of n genes in  
1682 the cluster) in a cluster x. **h**, The clustermap of the pairwise Hamming distance matrix of all  
1683 TF alignments in **e**.

1684 **Supplementary Figures**

**a** Minimum Message Length Inference Framework

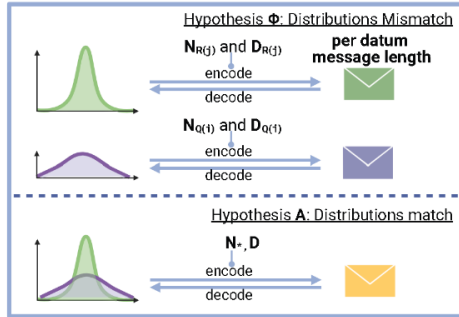

Interpolated trajectory of Gene X

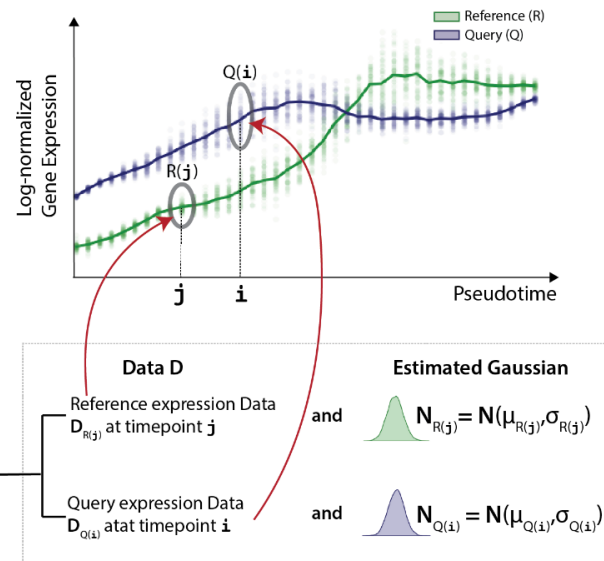

**b**

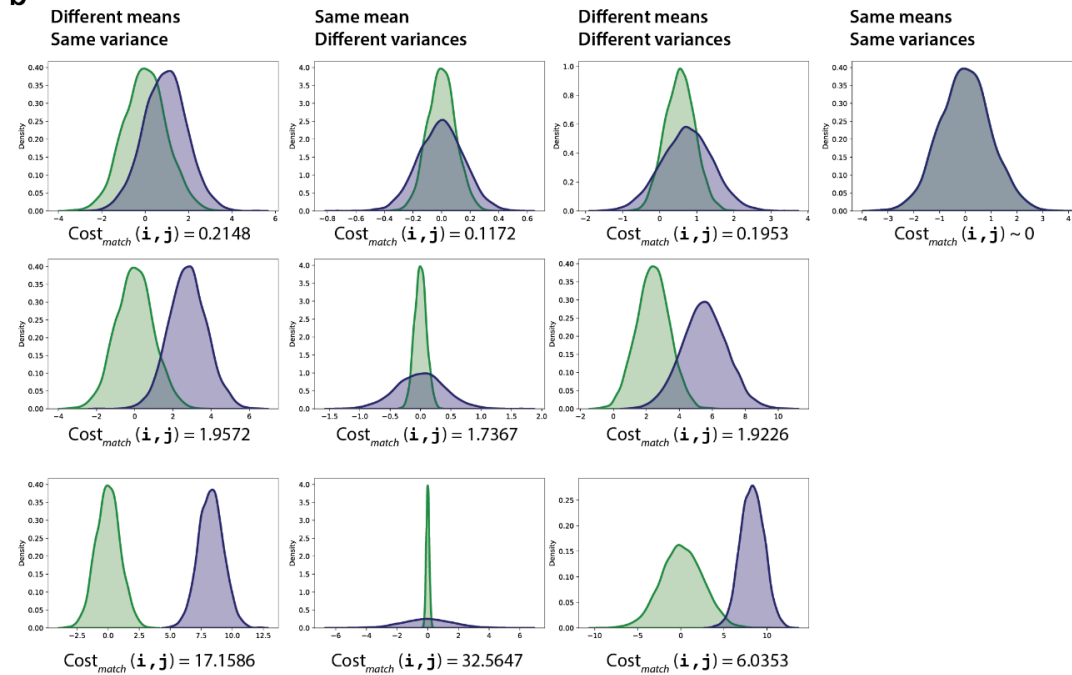

**c**

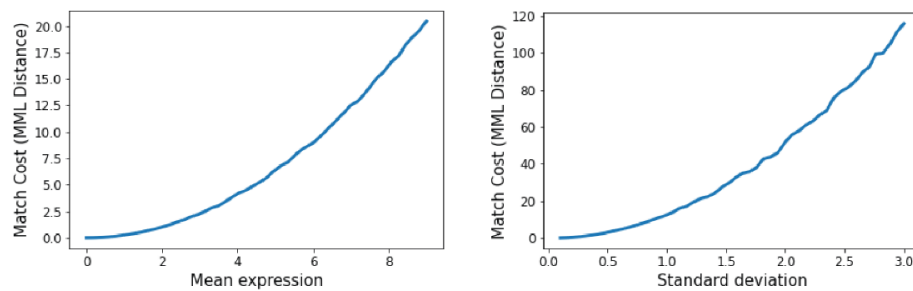

1686 **Supplementary Fig. 1 | Minimum message length (MML) inference based distance**  
1687 **function to compute the cost  $Cost_{match}(i, j)$  of matching a reference time point  $j$  and**  
1688 **query time point  $i$ . a,** The top right plot gives the interpolated log-normalized expression (y-  
1689 axis) of a particular gene X in the observed single-cell data of a reference  $R$  and query  $Q$ ,  
1690 against their pseudotime estimates (x-axis). The bold lines represent mean expression trends.  
1691 The faded data points represent the interpolated data (i.e. 50 random samples from the  
1692 estimated Gaussian distribution at each time point). As detailed in the Methods of the main  
1693 text, the scoring scheme of the G2G DP algorithm computes the cost of matching every pair  
1694 of time points between  $R$  and  $Q$  based on their corresponding interpolated expression  
1695 distributions. Here we consider an example reference time point  $j$  and query time point  $i$ , and  
1696 their respective single-cell expression datasets,  $R(j)$  and  $Q(i)$ , as circled in the plot. Their  
1697 interpolated expression distributions are  $N(\mu_{R(j)}, \sigma_{R(j)})$  and  $N(\mu_{Q(i)}, \sigma_{Q(i)})$ , denoted by  $N_{R(j)}$   
1698 and  $N_{Q(i)}$ , respectively. Their interpolated expression data vectors are  $D_{R(j)}$  and  $D_{Q(i)}$ . The  
1699 top left is the schematic illustration of our MML framework, extending the overview  
1700 schematic **Fig. 2** (top left) in the main text. Under the MML framework, we define two  
1701 hypotheses: Hypothesis **A**: the  $(i, j)$  time points match, and Hypothesis  $\Phi$ : the  $(i, j)$  time  
1702 points mismatch. Next we compute: (1) the total (per datum) message length of encoding **A**  
1703 and  $D$  jointly, and (2) the total (per-datum) message length of encoding  $\Phi$  and  $D$  jointly.  
1704 Then we define  $Cost_{match}(i, j)$  to be the difference between those two message lengths,  
1705 measured in nits (a unit of information). **b,** Example cases of distributional differences  
1706 (caused by the difference in means, the difference in variance, the difference in both mean  
1707 and variance) between  $R(j)$  and  $Q(i)$ , and their  $Cost_{match}(i, j)$  values measured in nits.  
1708 When the mean and variance is the same,  $Cost_{match}(i, j) \sim 0$ . **c,** Behavior of  $Cost_{match}(i, j)$   
1709 as the difference between the distributions increases. Left plot:  $Cost_{match}(i, j)$  between the  
1710 standard Gaussian distribution  $N(0, 1)$  and  $N(\mu, 1)$  Gaussian distribution for  $\mu \in [0, 9]$  at 50  
1711 equispaced points. 5000 data points have been randomly sampled from each  $N(\mu, 1)$   
1712 distribution to represent itself. Right plot:  $Cost_{match}(i, j)$  between the standard Gaussian  
1713 distribution  $N(0, 1)$  and  $N(0, \sigma)$  Gaussian distribution for  $\sigma \in [0.1, 3]$  at 50 equispaced  
1714 points. 5000 data points have been randomly sampled from each  $N(0, \sigma)$  distribution to  
1715 represent itself.

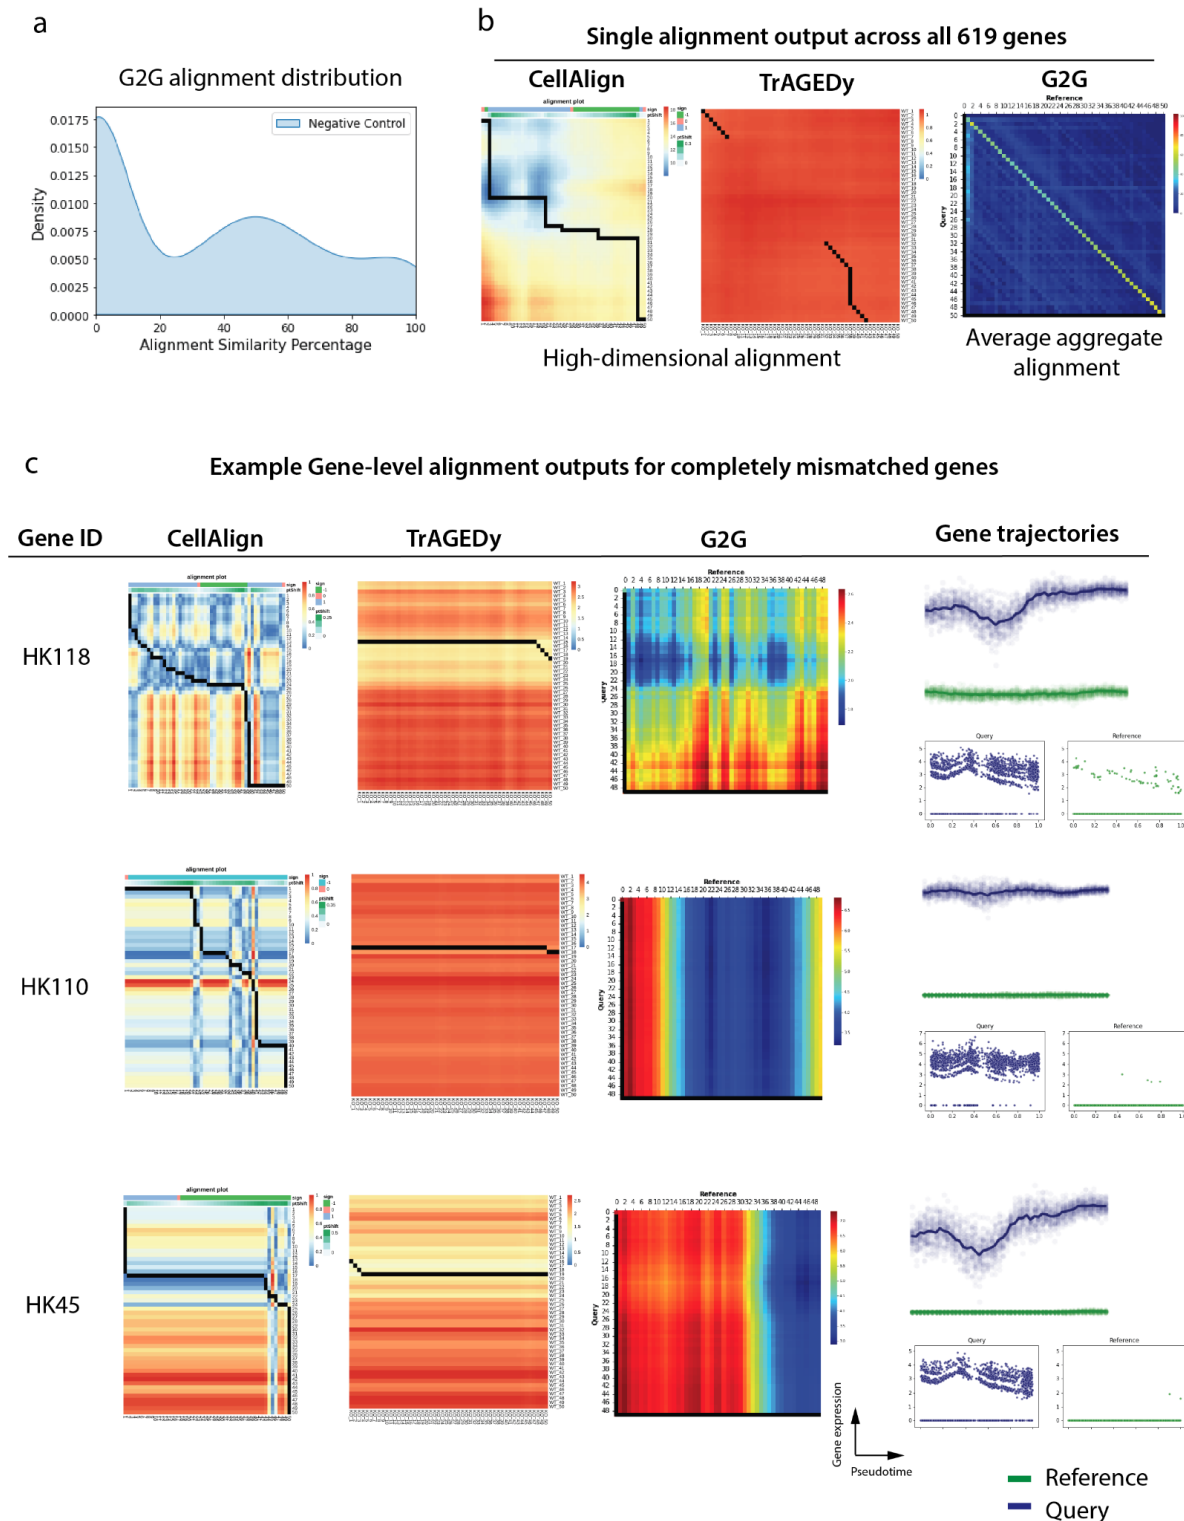

1716

1717

1718

1719

1720

1721

1722

1723

1724

**Supplementary Fig. 2 | Benchmarking G2G against the DTW based approach: CellAlign<sup>5</sup> and its most recent extension, TrAGEDy<sup>11</sup>, over a simulated negative control dataset from literature<sup>11</sup>.** **a**, Density plot of the G2G alignment similarity distribution (i.e. distribution of the percentage of matches/warps across all the G2G gene-level alignment outputs inferred for the 619 genes in the negative control dataset). **b**, The single alignments produced by CellAlign, TrAGEDy and G2G for all the 619 simulated genes. CellAlign and TrAGEDy generate a high dimensional alignment, whereas G2G generates an average alignment across all the gene-specific alignments. The alignment paths are drawn (in black)

1725 on the pairwise time point matrix between the reference and query trajectories. The color of  
1726 the CellAlign and TrAGEDy matrices represent their cost of aligning the corresponding pair  
1727 of reference and query time points. In the G2G matrix, the color represents the number of  
1728 genes showing match or warp for the corresponding pair of time points. In CellAlign and  
1729 TrAGEDy alignment plots, the vertical and horizontal lines represent warps, whereas  
1730 diagonal lines represent one-to-one matches. In the G2G alignment plots here, the full  
1731 vertical line joined by the full horizontal line denotes an alignment path with all insertions  
1732 followed by all deletions. **c**, CellAlign, TrAGEDy, and G2G outputs for three simulated  
1733 genes (with IDs: *HK118*, *HK110*, *HK45*) that have completely mismatched trajectories. Each  
1734 row gives the gene-specific alignment paths (highlighted in black) on the pairwise time point  
1735 matrices produced by each method for the corresponding gene. The matrix color represents  
1736 each methods' cost of aligning the corresponding pair of reference and query time points. For  
1737 G2G, this is the  $\log_{10}$  normalized nits compression (i.e. the difference between the match cost  
1738 and the mismatch cost as described in the Methods and **Supplementary Fig. 1**). The right-  
1739 most column ("Gene trajectories") shows the reference and query trajectories of the  
1740 corresponding gene in each row. For each gene row, the top panel shows the interpolated  
1741  $\log_{1p}$  normalized expression ( $y$ -axis) against pseudotime ( $x$ -axis). The bold lines represent  
1742 mean expression trends, while the faded data points are 50 random samples from the  
1743 estimated expression distribution at each time point. The bottom panels show the actual  $\log_{1p}$   
1744 normalized expression ( $y$ -axis) against pseudotime ( $x$ -axis) for reference (right) and query  
1745 (left). Each point represents a cell.

1746 **Supplementary Tables**

| <b>Framework component</b>                                         | <b>CellAlign<sup>5</sup></b>                                                                                                                                | <b>TrAGEDy<sup>11</sup></b>                                                                                                                                                                                                                         | <b>Genes2Genes</b>                                                                                                                                                                                     |
|--------------------------------------------------------------------|-------------------------------------------------------------------------------------------------------------------------------------------------------------|-----------------------------------------------------------------------------------------------------------------------------------------------------------------------------------------------------------------------------------------------------|--------------------------------------------------------------------------------------------------------------------------------------------------------------------------------------------------------|
| Input                                                              | (1) Log-normalized single-cell gene expression data<br>(2) Pseudotime estimates of the cells inferred using any available method of choice                  |                                                                                                                                                                                                                                                     |                                                                                                                                                                                                        |
| Algorithm                                                          | Uses Dynamic Time Warping (DTW) algorithm.                                                                                                                  | Builds on top of CellAlign, and performs post-hoc changes to the DTW alignment to capture mismatches.                                                                                                                                               | Combines DTW and Gotoh's biological sequence alignment <sup>15</sup> through a new dynamic programming algorithm.                                                                                      |
| Alignment states                                                   | Handles matches and warps only, subjected to a weight scheme with constant weight for warp open/extension                                                   | Identifies optimal start and end time points of the trajectories for DTW alignment to exclude regions of mismatch at the beginning and end. It further filters the DTW aligned regions based on alignment cost thresholding to identify mismatches. | Handles matches, warps and mismatches jointly, subjected to a five-state machine with state transition probabilities, handling gap/warp open/extension.                                                |
| Trajectory Interpolation                                           | Interpolates data using a Gaussian kernel-based weighted mean expression.                                                                                   | Extends CellAlign interpolation to use a cell density weighted window size.                                                                                                                                                                         | Extends CellAlign interpolation to distributional interpolation using weighted variance.                                                                                                               |
| Distance measure between a pair of reference and query time points | Uses min-max normalized, mean gene expression based Euclidean distance measure, to identify similar trends of expression dynamics across two conditions.    | Uses Spearman correlation, which does not require gene expression scaling as done in CellAlign, but does not support gene-level alignment.                                                                                                          | Uses a minimum message length inference based distributional distance measure, aiming to compare the gene expression distributions between two conditions.                                             |
| Alignment output                                                   | Outputs only a single, high-dimensional alignment (across a given gene list). A single, gene-level alignment can be obtained by giving a single gene input. | Modified, high-dimensional DTW alignment after pruning the matches.                                                                                                                                                                                 | Outputs gene-specific alignments with an explicit alignment state description via a five-state alignment string for all the given genes. Can output an aggregate alignment for any given set of genes. |
| Alignment clustering                                               | Can cluster genes only based on the pseudotime shifts in their                                                                                              | Does not explicitly discuss clustering.                                                                                                                                                                                                             | Can cluster genes based on their five-state alignment strings,                                                                                                                                         |

|                                 | alignments.                                                                                                                                       |                                                                                         | covering both matches and mismatches.                                                                                                                                                                      |
|---------------------------------|---------------------------------------------------------------------------------------------------------------------------------------------------|-----------------------------------------------------------------------------------------|------------------------------------------------------------------------------------------------------------------------------------------------------------------------------------------------------------|
| Differential expression capture | Requires additional downstream tasks to extract differential genes and regions (e.g. local DTW alignment with user-defined similarity threshold). | Sliding window soft clustering approach to extract DE using t-test/Mann-Whitney U test. | A gene-specific alignment output itself is a direct description of the differential expression status along the time axis. Provides a ranked list of genes based on their alignment similarity percentage. |

1747

1748 **Supplementary Table 1 | List of features included in trajectory alignment frameworks.**

1749 A table outlining and comparing the features of CellAlign<sup>5</sup>, TrAGEDy<sup>11</sup> and G2G.

1750

1751 **Supplementary Table 2**

1752 Gaussian Process based simulated gene alignments

1753 *GP\_based\_simulations\_gene\_alignments.csv*

1754

1755 **Supplementary Table 3**

1756 Gaussian Process based simulated gene alignment cluster statistics

1757 *GP\_based\_simulations\_cluster\_statistics.csv*

1758

1759 **Supplementary Table 4-17**

1760 Real data based simulations alignment statistics

1761 *pancreas\_simulations\_<perturbation\_type>\_size<perturbation\_size>gene\_alignments.csv*

1762

1763 **Supplementary Table 18**

1764 PAM vs. LPS ‘core antiviral module’ alignments

1765 *PAM\_LPS\_global\_gene\_alignments.csv*

1766

1767 **Supplementary Table 19-22**

1768 Overrepresentation analysis results of PAM vs. LPS ‘core antiviral module’ alignment clusters

1769 *PAM\_LPS\_global\_cluster\_<CLUSTER\_ID>\_pathways.csv*

1770

1771 **Supplementary Table 23**

1772 PAM vs. LPS ‘peaked inflammatory module’ alignments

1773 *PAM\_LPS\_local\_gene\_alignments.csv*

1774

1775 **Supplementary Table 24-30**

1776 Overrepresentation analysis results of PAM vs. LPS ‘peaked inflammatory module’ alignment clusters

1778 *PAM\_LPS\_local\_cluster\_<CLUSTER\_ID>\_pathways.csv*

1779

1780 **Supplementary Table 31**

1781 T1 vs. ATO all alignments

1782 *SPT\_all\_gene\_alignments.csv*

1783  
1784 **Supplementary Table 32**  
1785 Overrepresentation analysis results of T1 vs. ATO top 165 genes (under <40% alignment similarity  
1786 threshold)  
1787 *SPT\_all\_overrep\_results\_top\_k\_DE\_threshold\_0.4sim\_165genes.csv*  
1788  
1789 **Supplementary Table 33-45**  
1790 Overrepresentation analysis results of T1 vs. ATO alignment clusters  
1791 *SPT\_all\_cluster\_<CLUSTER\_ID>\_pathways.csv*  
1792  
1793 **Supplementary Table 46**  
1794 T1 vs. ATO DN onwards all alignments  
1795 *SPT\_DN\_gene\_alignments.csv*  
1796  
1797 **Supplementary Table 47**  
1798 Overrepresentation analysis results of T1 vs. ATO DN onwards top 130 genes (under <40% alignment  
1799 similarity threshold)  
1800 *SPT\_dn\_overrep\_results\_top\_k\_DE\_threshold\_0.4sim\_130genes.csv*  
1801  
1802 **Supplementary Table 48**  
1803 CD8+T vs. ATO DN onwards all alignments  
1804 *CD8\_DN\_gene\_alignments.csv*  
1805  
1806 **Supplementary Table 49**  
1807 Overrepresentation analysis results of CD8+T vs. ATO DN onwards top 120 genes (under <40%  
1808 alignment similarity threshold)  
1809 *CD8\_dn\_overrep\_results\_top\_k\_DE\_threshold\_0.4sim\_120genes.csv*  
1810  
1811 **Supplementary Table 50**  
1812 ATO metadata  
1813 *ATO\_WT\_manifest.csv*  
1814  
1815 **Supplementary Table 51**  
1816 ATO CITE-seq metadata  
1817 *ATO\_hashtagging.csv*  
1818  
1819 **Supplementary Table 52**  
1820 Negative control alignments  
1821 *negative\_control\_gene\_alignments.csv*
